# Supplementary material for: Genomic Insights of Cryobacterium Isolated From Ice Core Reveal Genome Dynamics for Adaptation in Glacier
Source: Front Microbiol. 2020 Jul 14;11:1530. doi: 10.3389/fmicb.2020.01530 (PMC7381226; doi:10.3389/fmicb.2020.01530)
Supplement: Supplementary file 6 [file Table_5.xlsx]

## Sheet: gainlosscount
Table S5 Detailed information of gene gain and loss in the COUNT analysis
Node	Category	variable	absent	present	gain	loss
1	Amino Acids and Derivatives	Cryobacterium_flavum_CGMCC_1	222	170	0	17
2	Amino Acids and Derivatives	Cryobacterium_sp_N19	224	176	0	9
3	Amino Acids and Derivatives	Cryobacterium_sp_N21	224	174	0	11
4	Amino Acids and Derivatives	Cryobacterium_luteum_CGMCC_1	213	153	0	43
5	Amino Acids and Derivatives	Cryobacterium_sp_Y29	257	145	0	7
6	Amino Acids and Derivatives	Cryobacterium_sp_M15	257	136	0	16
7	Amino Acids and Derivatives	Cryobacterium_sp_Y57	248	145	0	16
8	Amino Acids and Derivatives	Cryobacterium_sp_Y82	234	155	0	20
9	Amino Acids and Derivatives	Cryobacterium_levicorallinum_CGMCC_1	240	162	0	7
10	Amino Acids and Derivatives	Cryobacterium_sp_M91	240	164	0	5
11	Amino Acids and Derivatives	Cryobacterium_sp_Y62	231	169	0	9
12	Amino Acids and Derivatives	Cryobacterium_sp_Y50	231	178	0	0
13	Amino Acids and Derivatives	Cryobacterium_sp_Y11	189	155	2	63
14	Amino Acids and Derivatives	Cryobacterium_sp_MLB-32	251	141	0	17
15	Amino Acids and Derivatives	Cryobacterium_roopkundense_RuG17	251	143	0	15
16	Amino Acids and Derivatives	Cryobacterium_sp_M96	277	130	0	2
17	Amino Acids and Derivatives	Cryobacterium_sp_M23	271	137	0	1
18	Amino Acids and Derivatives	Cryobacterium_sp_M25	271	133	0	5
19	Amino Acids and Derivatives	Cryobacterium_sp_N22	262	140	0	7
20	Amino Acids and Derivatives	Cryobacterium_arcticum_PAMC_27867	261	134	1	13
21	Amino Acids and Derivatives	Cryobacterium_psychrotolerans_CGMCC_1	227	141	0	41
22	Amino Acids and Derivatives	Cryobacterium_mesophilum_CGMCC_1	214	108	0	87
23	Amino Acids and Derivatives	Agromyces_italicus_DSM_16388	254	143	0	12
24	Amino Acids and Derivatives	Agromyces_subbeticus_DSM_16689	254	142	0	13
25	Amino Acids and Derivatives	Humibacter_albus_DSM_18994	218	111	1	79
26	Amino Acids and Derivatives	Microbacterium_indicum_DSM_19969	288	106	1	14
27	Amino Acids and Derivatives	Microbacterium_gubbeenense_DSM_15944	289	94	0	26
28	Amino Acids and Derivatives	Microbacterium_luticocti_DSM_19459	263	110	0	36
29	Amino Acids and Derivatives	Leucobacter_chironomi_DSM_19883	252	115	1	41
30	Amino Acids and Derivatives	Agrococcus_lahaulensis_DSM_17612	275	105	0	29
31	Amino Acids and Derivatives	Gulosibacter_molinativorax_DSM_13485	310	97	2	0
32	Amino Acids and Derivatives	1	222	185	0	2
33	Amino Acids and Derivatives	2	211	185	2	11
34	Amino Acids and Derivatives	3	194	194	2	19
35	Amino Acids and Derivatives	4	248	152	0	9
36	Amino Acids and Derivatives	5	230	157	4	18
37	Amino Acids and Derivatives	6	196	175	0	38
38	Amino Acids and Derivatives	7	177	206	7	19
39	Amino Acids and Derivatives	8	218	166	3	22
40	Amino Acids and Derivatives	9	214	171	7	17
41	Amino Acids and Derivatives	10	184	188	0	37
42	Amino Acids and Derivatives	11	181	215	10	3
43	Amino Acids and Derivatives	12	186	210	8	5
44	Amino Acids and Derivatives	13	192	156	2	59
45	Amino Acids and Derivatives	14	181	199	16	13
46	Amino Acids and Derivatives	15	271	132	6	0
47	Amino Acids and Derivatives	16	242	130	2	35
48	Amino Acids and Derivatives	17	241	144	3	21
49	Amino Acids and Derivatives	18	227	165	0	17
50	Amino Acids and Derivatives	19	196	181	1	31
51	Amino Acids and Derivatives	20	188	186	26	9
52	Amino Acids and Derivatives	21	204	188	7	10
53	Amino Acids and Derivatives	22	204	148	7	50
54	Amino Acids and Derivatives	23	205	184	14	6
55	Amino Acids and Derivatives	24	212	184	6	7
56	Amino Acids and Derivatives	25	263	120	0	26
57	Amino Acids and Derivatives	26	216	144	2	47
58	Amino Acids and Derivatives	27	215	153	38	3
59	Amino Acids and Derivatives	28	253	134	22	0
60	Amino Acids and Derivatives	29	275	97	37	0
61	Carbohydrates	Cryobacterium_flavum_CGMCC_1	360	181	0	16
62	Carbohydrates	Cryobacterium_sp_N19	363	187	0	7
63	Carbohydrates	Cryobacterium_sp_N21	363	184	0	10
64	Carbohydrates	Cryobacterium_luteum_CGMCC_1	357	121	0	79
65	Carbohydrates	Cryobacterium_sp_Y29	394	140	0	23
66	Carbohydrates	Cryobacterium_sp_M15	394	153	0	10
67	Carbohydrates	Cryobacterium_sp_Y57	374	159	0	24
68	Carbohydrates	Cryobacterium_sp_Y82	352	143	0	62
69	Carbohydrates	Cryobacterium_levicorallinum_CGMCC_1	361	165	0	31
70	Carbohydrates	Cryobacterium_sp_M91	361	181	0	15
71	Carbohydrates	Cryobacterium_sp_Y62	337	212	0	8
72	Carbohydrates	Cryobacterium_sp_Y50	337	218	0	2
73	Carbohydrates	Cryobacterium_sp_Y11	253	163	1	140
74	Carbohydrates	Cryobacterium_sp_MLB-32	338	178	0	41
75	Carbohydrates	Cryobacterium_roopkundense_RuG17	338	186	0	33
76	Carbohydrates	Cryobacterium_sp_M96	381	162	0	14
77	Carbohydrates	Cryobacterium_sp_M23	384	167	0	6
78	Carbohydrates	Cryobacterium_sp_M25	384	160	0	13
79	Carbohydrates	Cryobacterium_sp_N22	362	177	0	18
80	Carbohydrates	Cryobacterium_arcticum_PAMC_27867	362	175	0	20
81	Carbohydrates	Cryobacterium_psychrotolerans_CGMCC_1	310	136	0	111
82	Carbohydrates	Cryobacterium_mesophilum_CGMCC_1	314	103	1	139
83	Carbohydrates	Agromyces_italicus_DSM_16388	387	127	0	43
84	Carbohydrates	Agromyces_subbeticus_DSM_16689	387	163	0	7
85	Carbohydrates	Humibacter_albus_DSM_18994	319	135	5	98
86	Carbohydrates	Microbacterium_indicum_DSM_19969	402	106	0	49
87	Carbohydrates	Microbacterium_gubbeenense_DSM_15944	402	122	0	33
88	Carbohydrates	Microbacterium_luticocti_DSM_19459	373	110	0	74
89	Carbohydrates	Leucobacter_chironomi_DSM_19883	433	73	0	51
90	Carbohydrates	Agrococcus_lahaulensis_DSM_17612	453	91	1	12
91	Carbohydrates	Gulosibacter_molinativorax_DSM_13485	494	63	0	0
92	Carbohydrates	1	360	194	0	3
93	Carbohydrates	2	347	187	10	13
94	Carbohydrates	3	299	199	1	58
95	Carbohydrates	4	373	162	1	21
96	Carbohydrates	5	350	181	2	24
97	Carbohydrates	6	300	205	0	52
98	Carbohydrates	7	243	255	2	57
99	Carbohydrates	8	309	195	1	52
100	Carbohydrates	9	300	210	10	37
101	Carbohydrates	10	238	240	7	72
102	Carbohydrates	11	235	293	19	10
103	Carbohydrates	12	233	282	21	21
104	Carbohydrates	13	249	214	5	89
105	Carbohydrates	14	223	267	36	31
106	Carbohydrates	15	380	172	1	4
107	Carbohydrates	16	325	171	5	56
108	Carbohydrates	17	323	188	7	39
109	Carbohydrates	18	301	218	9	29
110	Carbohydrates	19	259	247	0	51
111	Carbohydrates	20	256	239	59	3
112	Carbohydrates	21	302	227	15	13
113	Carbohydrates	22	311	164	6	76
114	Carbohydrates	23	303	219	21	14
115	Carbohydrates	24	315	210	23	9
116	Carbohydrates	25	365	147	8	37
117	Carbohydrates	26	337	183	1	36
118	Carbohydrates	27	338	124	95	0
119	Carbohydrates	28	433	103	21	0
120	Carbohydrates	29	454	63	40	0
121	Cell Division and Cell Cycle	Cryobacterium_flavum_CGMCC_1	21	9	0	3
122	Cell Division and Cell Cycle	Cryobacterium_sp_N19	22	8	0	3
123	Cell Division and Cell Cycle	Cryobacterium_sp_N21	22	10	0	1
124	Cell Division and Cell Cycle	Cryobacterium_luteum_CGMCC_1	20	8	0	5
125	Cell Division and Cell Cycle	Cryobacterium_sp_Y29	26	7	0	0
126	Cell Division and Cell Cycle	Cryobacterium_sp_M15	26	5	0	2
127	Cell Division and Cell Cycle	Cryobacterium_sp_Y57	24	8	0	1
128	Cell Division and Cell Cycle	Cryobacterium_sp_Y82	23	7	0	3
129	Cell Division and Cell Cycle	Cryobacterium_levicorallinum_CGMCC_1	22	9	0	2
130	Cell Division and Cell Cycle	Cryobacterium_sp_M91	22	8	0	3
131	Cell Division and Cell Cycle	Cryobacterium_sp_Y62	22	9	0	2
132	Cell Division and Cell Cycle	Cryobacterium_sp_Y50	22	8	0	3
133	Cell Division and Cell Cycle	Cryobacterium_sp_Y11	19	11	0	3
134	Cell Division and Cell Cycle	Cryobacterium_sp_MLB-32	23	6	0	4
135	Cell Division and Cell Cycle	Cryobacterium_roopkundense_RuG17	23	9	0	1
136	Cell Division and Cell Cycle	Cryobacterium_sp_M96	26	6	0	1
137	Cell Division and Cell Cycle	Cryobacterium_sp_M23	26	7	0	0
138	Cell Division and Cell Cycle	Cryobacterium_sp_M25	26	6	0	1
139	Cell Division and Cell Cycle	Cryobacterium_sp_N22	21	8	0	4
140	Cell Division and Cell Cycle	Cryobacterium_arcticum_PAMC_27867	21	10	0	2
141	Cell Division and Cell Cycle	Cryobacterium_psychrotolerans_CGMCC_1	20	5	0	8
142	Cell Division and Cell Cycle	Cryobacterium_mesophilum_CGMCC_1	24	5	0	4
143	Cell Division and Cell Cycle	Agromyces_italicus_DSM_16388	26	7	0	0
144	Cell Division and Cell Cycle	Agromyces_subbeticus_DSM_16689	26	6	0	1
145	Cell Division and Cell Cycle	Humibacter_albus_DSM_18994	25	4	0	4
146	Cell Division and Cell Cycle	Microbacterium_indicum_DSM_19969	27	6	0	0
147	Cell Division and Cell Cycle	Microbacterium_gubbeenense_DSM_15944	27	6	0	0
148	Cell Division and Cell Cycle	Microbacterium_luticocti_DSM_19459	25	7	0	1
149	Cell Division and Cell Cycle	Leucobacter_chironomi_DSM_19883	28	3	0	2
150	Cell Division and Cell Cycle	Agrococcus_lahaulensis_DSM_17612	28	2	0	3
151	Cell Division and Cell Cycle	Gulosibacter_molinativorax_DSM_13485	28	5	0	0
152	Cell Division and Cell Cycle	1	21	11	0	1
153	Cell Division and Cell Cycle	2	20	12	0	1
154	Cell Division and Cell Cycle	3	19	13	0	1
155	Cell Division and Cell Cycle	4	24	7	0	2
156	Cell Division and Cell Cycle	5	23	9	0	1
157	Cell Division and Cell Cycle	6	19	10	0	4
158	Cell Division and Cell Cycle	7	18	14	0	1
159	Cell Division and Cell Cycle	8	20	11	0	2
160	Cell Division and Cell Cycle	9	20	11	0	2
161	Cell Division and Cell Cycle	10	17	12	1	3
162	Cell Division and Cell Cycle	11	18	14	1	0
163	Cell Division and Cell Cycle	12	18	14	0	1
164	Cell Division and Cell Cycle	13	18	10	0	5
165	Cell Division and Cell Cycle	14	17	13	2	1
166	Cell Division and Cell Cycle	15	26	7	0	0
167	Cell Division and Cell Cycle	16	20	7	0	6
168	Cell Division and Cell Cycle	17	20	12	0	1
169	Cell Division and Cell Cycle	18	20	13	0	0
170	Cell Division and Cell Cycle	19	19	13	0	1
171	Cell Division and Cell Cycle	20	19	9	5	0
172	Cell Division and Cell Cycle	21	24	9	0	0
173	Cell Division and Cell Cycle	22	24	7	0	2
174	Cell Division and Cell Cycle	23	24	8	1	0
175	Cell Division and Cell Cycle	24	25	7	1	0
176	Cell Division and Cell Cycle	25	24	5	1	3
177	Cell Division and Cell Cycle	26	24	6	2	1
178	Cell Division and Cell Cycle	27	26	5	2	0
179	Cell Division and Cell Cycle	28	28	5	0	0
180	Cell Division and Cell Cycle	29	28	5	0	0
181	Cell Wall and Capsule	Cryobacterium_flavum_CGMCC_1	194	90	0	7
182	Cell Wall and Capsule	Cryobacterium_sp_N19	200	87	0	4
183	Cell Wall and Capsule	Cryobacterium_sp_N21	199	83	1	8
184	Cell Wall and Capsule	Cryobacterium_luteum_CGMCC_1	192	75	0	24
185	Cell Wall and Capsule	Cryobacterium_sp_Y29	206	78	0	7
186	Cell Wall and Capsule	Cryobacterium_sp_M15	206	72	0	13
187	Cell Wall and Capsule	Cryobacterium_sp_Y57	201	70	0	20
188	Cell Wall and Capsule	Cryobacterium_sp_Y82	194	78	0	19
189	Cell Wall and Capsule	Cryobacterium_levicorallinum_CGMCC_1	211	72	0	8
190	Cell Wall and Capsule	Cryobacterium_sp_M91	211	74	0	6
191	Cell Wall and Capsule	Cryobacterium_sp_Y62	197	88	0	6
192	Cell Wall and Capsule	Cryobacterium_sp_Y50	196	85	1	9
193	Cell Wall and Capsule	Cryobacterium_sp_Y11	181	80	0	30
194	Cell Wall and Capsule	Cryobacterium_sp_MLB-32	204	82	0	5
195	Cell Wall and Capsule	Cryobacterium_roopkundense_RuG17	204	74	0	13
196	Cell Wall and Capsule	Cryobacterium_sp_M96	209	73	0	9
197	Cell Wall and Capsule	Cryobacterium_sp_M23	208	82	0	1
198	Cell Wall and Capsule	Cryobacterium_sp_M25	208	77	0	6
199	Cell Wall and Capsule	Cryobacterium_sp_N22	209	78	0	4
200	Cell Wall and Capsule	Cryobacterium_arcticum_PAMC_27867	209	71	0	11
201	Cell Wall and Capsule	Cryobacterium_psychrotolerans_CGMCC_1	197	65	0	29
202	Cell Wall and Capsule	Cryobacterium_mesophilum_CGMCC_1	207	48	0	36
203	Cell Wall and Capsule	Agromyces_italicus_DSM_16388	212	64	0	15
204	Cell Wall and Capsule	Agromyces_subbeticus_DSM_16689	211	73	1	6
205	Cell Wall and Capsule	Humibacter_albus_DSM_18994	203	57	4	27
206	Cell Wall and Capsule	Microbacterium_indicum_DSM_19969	235	52	0	4
207	Cell Wall and Capsule	Microbacterium_gubbeenense_DSM_15944	235	47	0	9
208	Cell Wall and Capsule	Microbacterium_luticocti_DSM_19459	229	54	0	8
209	Cell Wall and Capsule	Leucobacter_chironomi_DSM_19883	237	38	0	16
210	Cell Wall and Capsule	Agrococcus_lahaulensis_DSM_17612	247	29	0	15
211	Cell Wall and Capsule	Gulosibacter_molinativorax_DSM_13485	254	36	1	0
212	Cell Wall and Capsule	1	194	91	0	6
213	Cell Wall and Capsule	2	185	90	7	9
214	Cell Wall and Capsule	3	175	97	2	17
215	Cell Wall and Capsule	4	201	85	0	5
216	Cell Wall and Capsule	5	190	86	4	11
217	Cell Wall and Capsule	6	176	96	1	18
218	Cell Wall and Capsule	7	170	108	6	7
219	Cell Wall and Capsule	8	192	78	2	19
220	Cell Wall and Capsule	9	190	90	4	7
221	Cell Wall and Capsule	10	172	93	4	22
222	Cell Wall and Capsule	11	171	105	10	5
223	Cell Wall and Capsule	12	175	102	8	6
224	Cell Wall and Capsule	13	176	80	7	28
225	Cell Wall and Capsule	14	181	101	7	2
226	Cell Wall and Capsule	15	207	81	2	1
227	Cell Wall and Capsule	16	194	75	7	15
228	Cell Wall and Capsule	17	200	81	1	9
229	Cell Wall and Capsule	18	190	83	7	11
230	Cell Wall and Capsule	19	188	94	0	9
231	Cell Wall and Capsule	20	185	81	22	3
232	Cell Wall and Capsule	21	197	80	4	10
233	Cell Wall and Capsule	22	195	73	6	17
234	Cell Wall and Capsule	23	196	79	11	5
235	Cell Wall and Capsule	24	205	68	16	2
236	Cell Wall and Capsule	25	224	51	5	11
237	Cell Wall and Capsule	26	215	56	6	14
238	Cell Wall and Capsule	27	219	52	18	2
239	Cell Wall and Capsule	28	236	43	11	1
240	Cell Wall and Capsule	29	247	36	8	0
241	Cofactors, Vitamins, Prosthetic Groups, Pigments	Cryobacterium_flavum_CGMCC_1	608	300	2	40
242	Cofactors, Vitamins, Prosthetic Groups, Pigments	Cryobacterium_sp_N19	619	305	0	26
243	Cofactors, Vitamins, Prosthetic Groups, Pigments	Cryobacterium_sp_N21	618	307	1	24
244	Cofactors, Vitamins, Prosthetic Groups, Pigments	Cryobacterium_luteum_CGMCC_1	594	281	1	74
245	Cofactors, Vitamins, Prosthetic Groups, Pigments	Cryobacterium_sp_Y29	639	269	0	42
246	Cofactors, Vitamins, Prosthetic Groups, Pigments	Cryobacterium_sp_M15	639	280	0	31
247	Cofactors, Vitamins, Prosthetic Groups, Pigments	Cryobacterium_sp_Y57	605	288	0	57
248	Cofactors, Vitamins, Prosthetic Groups, Pigments	Cryobacterium_sp_Y82	582	274	1	93
249	Cofactors, Vitamins, Prosthetic Groups, Pigments	Cryobacterium_levicorallinum_CGMCC_1	648	272	0	30
250	Cofactors, Vitamins, Prosthetic Groups, Pigments	Cryobacterium_sp_M91	647	284	1	18
251	Cofactors, Vitamins, Prosthetic Groups, Pigments	Cryobacterium_sp_Y62	627	297	0	26
252	Cofactors, Vitamins, Prosthetic Groups, Pigments	Cryobacterium_sp_Y50	626	315	1	8
253	Cofactors, Vitamins, Prosthetic Groups, Pigments	Cryobacterium_sp_Y11	566	271	0	113
254	Cofactors, Vitamins, Prosthetic Groups, Pigments	Cryobacterium_sp_MLB-32	656	258	0	36
255	Cofactors, Vitamins, Prosthetic Groups, Pigments	Cryobacterium_roopkundense_RuG17	656	262	0	32
256	Cofactors, Vitamins, Prosthetic Groups, Pigments	Cryobacterium_sp_M96	686	247	0	17
257	Cofactors, Vitamins, Prosthetic Groups, Pigments	Cryobacterium_sp_M23	687	261	0	2
258	Cofactors, Vitamins, Prosthetic Groups, Pigments	Cryobacterium_sp_M25	687	246	0	17
259	Cofactors, Vitamins, Prosthetic Groups, Pigments	Cryobacterium_sp_N22	670	253	0	27
260	Cofactors, Vitamins, Prosthetic Groups, Pigments	Cryobacterium_arcticum_PAMC_27867	670	264	0	16
261	Cofactors, Vitamins, Prosthetic Groups, Pigments	Cryobacterium_psychrotolerans_CGMCC_1	611	238	0	101
262	Cofactors, Vitamins, Prosthetic Groups, Pigments	Cryobacterium_mesophilum_CGMCC_1	626	154	1	169
263	Cofactors, Vitamins, Prosthetic Groups, Pigments	Agromyces_italicus_DSM_16388	687	237	0	26
264	Cofactors, Vitamins, Prosthetic Groups, Pigments	Agromyces_subbeticus_DSM_16689	687	245	0	18
265	Cofactors, Vitamins, Prosthetic Groups, Pigments	Humibacter_albus_DSM_18994	636	187	5	122
266	Cofactors, Vitamins, Prosthetic Groups, Pigments	Microbacterium_indicum_DSM_19969	725	197	0	28
267	Cofactors, Vitamins, Prosthetic Groups, Pigments	Microbacterium_gubbeenense_DSM_15944	724	187	1	38
268	Cofactors, Vitamins, Prosthetic Groups, Pigments	Microbacterium_luticocti_DSM_19459	694	192	0	64
269	Cofactors, Vitamins, Prosthetic Groups, Pigments	Leucobacter_chironomi_DSM_19883	726	136	2	86
270	Cofactors, Vitamins, Prosthetic Groups, Pigments	Agrococcus_lahaulensis_DSM_17612	748	135	2	65
271	Cofactors, Vitamins, Prosthetic Groups, Pigments	Gulosibacter_molinativorax_DSM_13485	782	162	6	0
272	Cofactors, Vitamins, Prosthetic Groups, Pigments	1	610	331	0	9
273	Cofactors, Vitamins, Prosthetic Groups, Pigments	2	575	320	20	35
274	Cofactors, Vitamins, Prosthetic Groups, Pigments	3	528	348	7	67
275	Cofactors, Vitamins, Prosthetic Groups, Pigments	4	603	309	2	36
276	Cofactors, Vitamins, Prosthetic Groups, Pigments	5	576	338	7	29
277	Cofactors, Vitamins, Prosthetic Groups, Pigments	6	531	363	4	52
278	Cofactors, Vitamins, Prosthetic Groups, Pigments	7	503	381	34	32
279	Cofactors, Vitamins, Prosthetic Groups, Pigments	8	589	298	4	59
280	Cofactors, Vitamins, Prosthetic Groups, Pigments	9	574	304	19	53
281	Cofactors, Vitamins, Prosthetic Groups, Pigments	10	531	351	6	62
282	Cofactors, Vitamins, Prosthetic Groups, Pigments	11	527	374	39	10
283	Cofactors, Vitamins, Prosthetic Groups, Pigments	12	544	355	29	22
284	Cofactors, Vitamins, Prosthetic Groups, Pigments	13	570	291	3	86
285	Cofactors, Vitamins, Prosthetic Groups, Pigments	14	531	343	34	42
286	Cofactors, Vitamins, Prosthetic Groups, Pigments	15	683	260	3	4
287	Cofactors, Vitamins, Prosthetic Groups, Pigments	16	628	249	15	58
288	Cofactors, Vitamins, Prosthetic Groups, Pigments	17	629	266	14	41
289	Cofactors, Vitamins, Prosthetic Groups, Pigments	18	607	303	4	36
290	Cofactors, Vitamins, Prosthetic Groups, Pigments	19	564	338	1	47
291	Cofactors, Vitamins, Prosthetic Groups, Pigments	20	559	317	68	6
292	Cofactors, Vitamins, Prosthetic Groups, Pigments	21	614	320	3	13
293	Cofactors, Vitamins, Prosthetic Groups, Pigments	22	602	248	15	85
294	Cofactors, Vitamins, Prosthetic Groups, Pigments	23	601	293	40	16
295	Cofactors, Vitamins, Prosthetic Groups, Pigments	24	630	291	18	11
296	Cofactors, Vitamins, Prosthetic Groups, Pigments	25	680	211	14	45
297	Cofactors, Vitamins, Prosthetic Groups, Pigments	26	639	247	9	55
298	Cofactors, Vitamins, Prosthetic Groups, Pigments	27	646	220	82	2
299	Cofactors, Vitamins, Prosthetic Groups, Pigments	28	727	199	23	1
300	Cofactors, Vitamins, Prosthetic Groups, Pigments	29	750	162	38	0
301	DNA Metabolism	Cryobacterium_flavum_CGMCC_1	107	63	0	7
302	DNA Metabolism	Cryobacterium_sp_N19	108	65	0	4
303	DNA Metabolism	Cryobacterium_sp_N21	108	66	0	3
304	DNA Metabolism	Cryobacterium_luteum_CGMCC_1	103	66	0	8
305	DNA Metabolism	Cryobacterium_sp_Y29	113	61	1	2
306	DNA Metabolism	Cryobacterium_sp_M15	113	57	1	6
307	DNA Metabolism	Cryobacterium_sp_Y57	109	61	0	7
308	DNA Metabolism	Cryobacterium_sp_Y82	105	56	0	16
309	DNA Metabolism	Cryobacterium_levicorallinum_CGMCC_1	114	56	0	7
310	DNA Metabolism	Cryobacterium_sp_M91	114	60	0	3
311	DNA Metabolism	Cryobacterium_sp_Y62	110	61	0	6
312	DNA Metabolism	Cryobacterium_sp_Y50	110	64	0	3
313	DNA Metabolism	Cryobacterium_sp_Y11	92	58	0	27
314	DNA Metabolism	Cryobacterium_sp_MLB-32	106	59	0	12
315	DNA Metabolism	Cryobacterium_roopkundense_RuG17	106	63	0	8
316	DNA Metabolism	Cryobacterium_sp_M96	120	50	0	7
317	DNA Metabolism	Cryobacterium_sp_M23	120	53	0	4
318	DNA Metabolism	Cryobacterium_sp_M25	120	54	0	3
319	DNA Metabolism	Cryobacterium_sp_N22	115	60	0	2
320	DNA Metabolism	Cryobacterium_arcticum_PAMC_27867	115	59	0	3
321	DNA Metabolism	Cryobacterium_psychrotolerans_CGMCC_1	108	51	0	18
322	DNA Metabolism	Cryobacterium_mesophilum_CGMCC_1	100	47	0	30
323	DNA Metabolism	Agromyces_italicus_DSM_16388	115	57	1	4
324	DNA Metabolism	Agromyces_subbeticus_DSM_16689	116	57	0	4
325	DNA Metabolism	Humibacter_albus_DSM_18994	97	51	0	29
326	DNA Metabolism	Microbacterium_indicum_DSM_19969	117	47	1	12
327	DNA Metabolism	Microbacterium_gubbeenense_DSM_15944	118	56	0	3
328	DNA Metabolism	Microbacterium_luticocti_DSM_19459	104	58	2	13
329	DNA Metabolism	Leucobacter_chironomi_DSM_19883	116	44	1	16
330	DNA Metabolism	Agrococcus_lahaulensis_DSM_17612	125	39	0	13
331	DNA Metabolism	Gulosibacter_molinativorax_DSM_13485	132	45	0	0
332	DNA Metabolism	1	107	69	0	1
333	DNA Metabolism	2	103	70	0	4
334	DNA Metabolism	3	93	72	2	10
335	DNA Metabolism	4	109	63	0	5
336	DNA Metabolism	5	105	68	0	4
337	DNA Metabolism	6	94	71	1	11
338	DNA Metabolism	7	91	81	1	4
339	DNA Metabolism	8	107	62	1	7
340	DNA Metabolism	9	105	64	3	5
341	DNA Metabolism	10	90	67	2	18
342	DNA Metabolism	11	90	83	2	2
343	DNA Metabolism	12	89	80	5	3
344	DNA Metabolism	13	93	70	1	13
345	DNA Metabolism	14	89	76	7	5
346	DNA Metabolism	15	120	57	0	0
347	DNA Metabolism	16	109	56	1	11
348	DNA Metabolism	17	108	60	2	7
349	DNA Metabolism	18	108	67	0	2
350	DNA Metabolism	19	96	69	0	12
351	DNA Metabolism	20	92	73	8	4
352	DNA Metabolism	21	95	75	2	5
353	DNA Metabolism	22	94	58	3	22
354	DNA Metabolism	23	95	78	2	2
355	DNA Metabolism	24	94	75	5	3
356	DNA Metabolism	25	103	56	3	15
357	DNA Metabolism	26	94	66	5	12
358	DNA Metabolism	27	96	57	21	3
359	DNA Metabolism	28	117	52	8	0
360	DNA Metabolism	29	125	45	7	0
361	Dormancy and Sporulation	Cryobacterium_flavum_CGMCC_1	6	3	0	0
362	Dormancy and Sporulation	Cryobacterium_sp_N19	6	3	0	0
363	Dormancy and Sporulation	Cryobacterium_sp_N21	6	3	0	0
364	Dormancy and Sporulation	Cryobacterium_luteum_CGMCC_1	5	3	0	1
365	Dormancy and Sporulation	Cryobacterium_sp_Y29	8	1	0	0
366	Dormancy and Sporulation	Cryobacterium_sp_M15	8	1	0	0
367	Dormancy and Sporulation	Cryobacterium_sp_Y57	7	2	0	0
368	Dormancy and Sporulation	Cryobacterium_sp_Y82	7	2	0	0
369	Dormancy and Sporulation	Cryobacterium_levicorallinum_CGMCC_1	4	4	0	1
370	Dormancy and Sporulation	Cryobacterium_sp_M91	4	5	0	0
371	Dormancy and Sporulation	Cryobacterium_sp_Y62	5	4	0	0
372	Dormancy and Sporulation	Cryobacterium_sp_Y50	5	4	0	0
373	Dormancy and Sporulation	Cryobacterium_sp_Y11	4	2	0	3
374	Dormancy and Sporulation	Cryobacterium_sp_MLB-32	6	2	0	1
375	Dormancy and Sporulation	Cryobacterium_roopkundense_RuG17	6	3	0	0
376	Dormancy and Sporulation	Cryobacterium_sp_M96	6	3	0	0
377	Dormancy and Sporulation	Cryobacterium_sp_M23	6	3	0	0
378	Dormancy and Sporulation	Cryobacterium_sp_M25	6	3	0	0
379	Dormancy and Sporulation	Cryobacterium_sp_N22	7	2	0	0
380	Dormancy and Sporulation	Cryobacterium_arcticum_PAMC_27867	7	2	0	0
381	Dormancy and Sporulation	Cryobacterium_psychrotolerans_CGMCC_1	4	3	0	2
382	Dormancy and Sporulation	Cryobacterium_mesophilum_CGMCC_1	5	1	0	3
383	Dormancy and Sporulation	Agromyces_italicus_DSM_16388	7	1	0	1
384	Dormancy and Sporulation	Agromyces_subbeticus_DSM_16689	7	2	0	0
385	Dormancy and Sporulation	Humibacter_albus_DSM_18994	5	1	0	3
386	Dormancy and Sporulation	Microbacterium_indicum_DSM_19969	7	1	0	1
387	Dormancy and Sporulation	Microbacterium_gubbeenense_DSM_15944	7	1	0	1
388	Dormancy and Sporulation	Microbacterium_luticocti_DSM_19459	5	3	0	1
389	Dormancy and Sporulation	Leucobacter_chironomi_DSM_19883	8	1	0	0
390	Dormancy and Sporulation	Agrococcus_lahaulensis_DSM_17612	8	0	0	1
391	Dormancy and Sporulation	Gulosibacter_molinativorax_DSM_13485	8	1	0	0
392	Dormancy and Sporulation	1	6	3	0	0
393	Dormancy and Sporulation	2	5	3	0	1
394	Dormancy and Sporulation	3	4	4	0	1
395	Dormancy and Sporulation	4	7	1	0	1
396	Dormancy and Sporulation	5	7	2	0	0
397	Dormancy and Sporulation	6	4	2	0	3
398	Dormancy and Sporulation	7	3	5	0	1
399	Dormancy and Sporulation	8	2	3	2	2
400	Dormancy and Sporulation	9	4	4	0	1
401	Dormancy and Sporulation	10	3	5	0	1
402	Dormancy and Sporulation	11	3	5	1	0
403	Dormancy and Sporulation	12	4	5	0	0
404	Dormancy and Sporulation	13	4	3	0	2
405	Dormancy and Sporulation	14	4	5	0	0
406	Dormancy and Sporulation	15	6	3	0	0
407	Dormancy and Sporulation	16	5	3	0	1
408	Dormancy and Sporulation	17	5	2	0	2
409	Dormancy and Sporulation	18	4	4	0	1
410	Dormancy and Sporulation	19	4	5	0	0
411	Dormancy and Sporulation	20	4	4	1	0
412	Dormancy and Sporulation	21	5	4	0	0
413	Dormancy and Sporulation	22	5	2	0	2
414	Dormancy and Sporulation	23	5	4	0	0
415	Dormancy and Sporulation	24	5	4	0	0
416	Dormancy and Sporulation	25	5	2	0	2
417	Dormancy and Sporulation	26	5	4	0	0
418	Dormancy and Sporulation	27	5	1	3	0
419	Dormancy and Sporulation	28	8	1	0	0
420	Dormancy and Sporulation	29	8	1	0	0
421	Fatty Acids, Lipids, and Isoprenoids	Cryobacterium_flavum_CGMCC_1	158	67	0	3
422	Fatty Acids, Lipids, and Isoprenoids	Cryobacterium_sp_N19	157	70	0	1
423	Fatty Acids, Lipids, and Isoprenoids	Cryobacterium_sp_N21	157	70	0	1
424	Fatty Acids, Lipids, and Isoprenoids	Cryobacterium_luteum_CGMCC_1	157	49	0	22
425	Fatty Acids, Lipids, and Isoprenoids	Cryobacterium_sp_Y29	166	53	0	9
426	Fatty Acids, Lipids, and Isoprenoids	Cryobacterium_sp_M15	166	56	0	6
427	Fatty Acids, Lipids, and Isoprenoids	Cryobacterium_sp_Y57	161	58	0	9
428	Fatty Acids, Lipids, and Isoprenoids	Cryobacterium_sp_Y82	154	59	0	15
429	Fatty Acids, Lipids, and Isoprenoids	Cryobacterium_levicorallinum_CGMCC_1	153	69	0	6
430	Fatty Acids, Lipids, and Isoprenoids	Cryobacterium_sp_M91	153	67	0	8
431	Fatty Acids, Lipids, and Isoprenoids	Cryobacterium_sp_Y62	151	73	0	4
432	Fatty Acids, Lipids, and Isoprenoids	Cryobacterium_sp_Y50	150	76	1	1
433	Fatty Acids, Lipids, and Isoprenoids	Cryobacterium_sp_Y11	130	56	1	41
434	Fatty Acids, Lipids, and Isoprenoids	Cryobacterium_sp_MLB-32	155	58	0	15
435	Fatty Acids, Lipids, and Isoprenoids	Cryobacterium_roopkundense_RuG17	155	61	0	12
436	Fatty Acids, Lipids, and Isoprenoids	Cryobacterium_sp_M96	174	52	0	2
437	Fatty Acids, Lipids, and Isoprenoids	Cryobacterium_sp_M23	173	54	0	1
438	Fatty Acids, Lipids, and Isoprenoids	Cryobacterium_sp_M25	173	53	0	2
439	Fatty Acids, Lipids, and Isoprenoids	Cryobacterium_sp_N22	182	42	0	4
440	Fatty Acids, Lipids, and Isoprenoids	Cryobacterium_arcticum_PAMC_27867	182	42	0	4
441	Fatty Acids, Lipids, and Isoprenoids	Cryobacterium_psychrotolerans_CGMCC_1	155	56	1	16
442	Fatty Acids, Lipids, and Isoprenoids	Cryobacterium_mesophilum_CGMCC_1	155	33	0	40
443	Fatty Acids, Lipids, and Isoprenoids	Agromyces_italicus_DSM_16388	180	43	0	5
444	Fatty Acids, Lipids, and Isoprenoids	Agromyces_subbeticus_DSM_16689	179	42	1	6
445	Fatty Acids, Lipids, and Isoprenoids	Humibacter_albus_DSM_18994	161	32	0	35
446	Fatty Acids, Lipids, and Isoprenoids	Microbacterium_indicum_DSM_19969	192	28	0	8
447	Fatty Acids, Lipids, and Isoprenoids	Microbacterium_gubbeenense_DSM_15944	192	27	0	9
448	Fatty Acids, Lipids, and Isoprenoids	Microbacterium_luticocti_DSM_19459	179	40	0	9
449	Fatty Acids, Lipids, and Isoprenoids	Leucobacter_chironomi_DSM_19883	172	33	0	23
450	Fatty Acids, Lipids, and Isoprenoids	Agrococcus_lahaulensis_DSM_17612	182	29	0	17
451	Fatty Acids, Lipids, and Isoprenoids	Gulosibacter_molinativorax_DSM_13485	193	34	1	0
452	Fatty Acids, Lipids, and Isoprenoids	1	157	70	1	0
453	Fatty Acids, Lipids, and Isoprenoids	2	154	67	3	4
454	Fatty Acids, Lipids, and Isoprenoids	3	141	70	1	16
455	Fatty Acids, Lipids, and Isoprenoids	4	160	61	1	6
456	Fatty Acids, Lipids, and Isoprenoids	5	151	64	3	10
457	Fatty Acids, Lipids, and Isoprenoids	6	141	73	1	13
458	Fatty Acids, Lipids, and Isoprenoids	7	127	85	1	15
459	Fatty Acids, Lipids, and Isoprenoids	8	137	67	8	16
460	Fatty Acids, Lipids, and Isoprenoids	9	137	69	8	14
461	Fatty Acids, Lipids, and Isoprenoids	10	128	83	0	17
462	Fatty Acids, Lipids, and Isoprenoids	11	126	95	5	2
463	Fatty Acids, Lipids, and Isoprenoids	12	128	86	11	3
464	Fatty Acids, Lipids, and Isoprenoids	13	138	72	1	17
465	Fatty Acids, Lipids, and Isoprenoids	14	129	76	13	10
466	Fatty Acids, Lipids, and Isoprenoids	15	172	53	2	1
467	Fatty Acids, Lipids, and Isoprenoids	16	162	49	5	12
468	Fatty Acids, Lipids, and Isoprenoids	17	166	45	1	16
469	Fatty Acids, Lipids, and Isoprenoids	18	156	61	0	11
470	Fatty Acids, Lipids, and Isoprenoids	19	142	72	0	14
471	Fatty Acids, Lipids, and Isoprenoids	20	142	73	13	0
472	Fatty Acids, Lipids, and Isoprenoids	21	151	66	7	4
473	Fatty Acids, Lipids, and Isoprenoids	22	155	45	3	25
474	Fatty Acids, Lipids, and Isoprenoids	23	155	64	6	3
475	Fatty Acids, Lipids, and Isoprenoids	24	155	62	5	6
476	Fatty Acids, Lipids, and Isoprenoids	25	179	36	0	13
477	Fatty Acids, Lipids, and Isoprenoids	26	160	49	0	19
478	Fatty Acids, Lipids, and Isoprenoids	27	160	56	12	0
479	Fatty Acids, Lipids, and Isoprenoids	28	170	44	12	2
480	Fatty Acids, Lipids, and Isoprenoids	29	182	34	12	0
481	Iron acquisition and metabolism	Cryobacterium_flavum_CGMCC_1	23	7	0	1
482	Iron acquisition and metabolism	Cryobacterium_sp_N19	23	7	0	1
483	Iron acquisition and metabolism	Cryobacterium_sp_N21	23	8	0	0
484	Iron acquisition and metabolism	Cryobacterium_luteum_CGMCC_1	20	10	0	1
485	Iron acquisition and metabolism	Cryobacterium_sp_Y29	21	7	0	3
486	Iron acquisition and metabolism	Cryobacterium_sp_M15	21	10	0	0
487	Iron acquisition and metabolism	Cryobacterium_sp_Y57	21	7	0	3
488	Iron acquisition and metabolism	Cryobacterium_sp_Y82	20	9	0	2
489	Iron acquisition and metabolism	Cryobacterium_levicorallinum_CGMCC_1	20	9	0	2
490	Iron acquisition and metabolism	Cryobacterium_sp_M91	20	11	0	0
491	Iron acquisition and metabolism	Cryobacterium_sp_Y62	22	9	0	0
492	Iron acquisition and metabolism	Cryobacterium_sp_Y50	22	9	0	0
493	Iron acquisition and metabolism	Cryobacterium_sp_Y11	19	8	0	4
494	Iron acquisition and metabolism	Cryobacterium_sp_MLB-32	20	9	0	2
495	Iron acquisition and metabolism	Cryobacterium_roopkundense_RuG17	20	10	0	1
496	Iron acquisition and metabolism	Cryobacterium_sp_M96	21	9	0	1
497	Iron acquisition and metabolism	Cryobacterium_sp_M23	21	10	0	0
498	Iron acquisition and metabolism	Cryobacterium_sp_M25	21	10	0	0
499	Iron acquisition and metabolism	Cryobacterium_sp_N22	18	11	0	2
500	Iron acquisition and metabolism	Cryobacterium_arcticum_PAMC_27867	18	12	0	1
501	Iron acquisition and metabolism	Cryobacterium_psychrotolerans_CGMCC_1	16	10	0	5
502	Iron acquisition and metabolism	Cryobacterium_mesophilum_CGMCC_1	16	6	0	9
503	Iron acquisition and metabolism	Agromyces_italicus_DSM_16388	20	8	0	3
504	Iron acquisition and metabolism	Agromyces_subbeticus_DSM_16689	20	9	0	2
505	Iron acquisition and metabolism	Humibacter_albus_DSM_18994	14	7	0	10
506	Iron acquisition and metabolism	Microbacterium_indicum_DSM_19969	20	11	0	0
507	Iron acquisition and metabolism	Microbacterium_gubbeenense_DSM_15944	20	6	0	5
508	Iron acquisition and metabolism	Microbacterium_luticocti_DSM_19459	17	6	0	8
509	Iron acquisition and metabolism	Leucobacter_chironomi_DSM_19883	20	10	0	1
510	Iron acquisition and metabolism	Agrococcus_lahaulensis_DSM_17612	26	2	0	3
511	Iron acquisition and metabolism	Gulosibacter_molinativorax_DSM_13485	28	3	0	0
512	Iron acquisition and metabolism	1	23	8	0	0
513	Iron acquisition and metabolism	2	20	8	0	3
514	Iron acquisition and metabolism	3	19	11	0	1
515	Iron acquisition and metabolism	4	21	10	0	0
516	Iron acquisition and metabolism	5	20	10	0	1
517	Iron acquisition and metabolism	6	19	11	0	1
518	Iron acquisition and metabolism	7	18	11	1	1
519	Iron acquisition and metabolism	8	20	11	0	0
520	Iron acquisition and metabolism	9	20	9	0	2
521	Iron acquisition and metabolism	10	19	11	0	1
522	Iron acquisition and metabolism	11	19	12	0	0
523	Iron acquisition and metabolism	12	19	12	0	0
524	Iron acquisition and metabolism	13	19	11	0	1
525	Iron acquisition and metabolism	14	14	11	1	5
526	Iron acquisition and metabolism	15	21	10	0	0
527	Iron acquisition and metabolism	16	17	10	0	4
528	Iron acquisition and metabolism	17	17	13	0	1
529	Iron acquisition and metabolism	18	16	14	0	1
530	Iron acquisition and metabolism	19	15	15	0	1
531	Iron acquisition and metabolism	20	14	14	2	1
532	Iron acquisition and metabolism	21	12	14	1	4
533	Iron acquisition and metabolism	22	13	11	0	7
534	Iron acquisition and metabolism	23	10	14	4	3
535	Iron acquisition and metabolism	24	13	16	1	1
536	Iron acquisition and metabolism	25	16	10	1	4
537	Iron acquisition and metabolism	26	14	14	0	3
538	Iron acquisition and metabolism	27	14	11	6	0
539	Iron acquisition and metabolism	28	20	5	6	0
540	Iron acquisition and metabolism	29	26	3	2	0
541	Membrane Transport	Cryobacterium_flavum_CGMCC_1	242	131	0	18
542	Membrane Transport	Cryobacterium_sp_N19	243	135	0	13
543	Membrane Transport	Cryobacterium_sp_N21	243	129	0	19
544	Membrane Transport	Cryobacterium_luteum_CGMCC_1	238	105	0	48
545	Membrane Transport	Cryobacterium_sp_Y29	269	106	0	16
546	Membrane Transport	Cryobacterium_sp_M15	268	106	1	16
547	Membrane Transport	Cryobacterium_sp_Y57	251	118	0	22
548	Membrane Transport	Cryobacterium_sp_Y82	241	105	0	45
549	Membrane Transport	Cryobacterium_levicorallinum_CGMCC_1	265	117	0	9
550	Membrane Transport	Cryobacterium_sp_M91	264	117	1	9
551	Membrane Transport	Cryobacterium_sp_Y62	254	125	0	12
552	Membrane Transport	Cryobacterium_sp_Y50	253	134	1	3
553	Membrane Transport	Cryobacterium_sp_Y11	194	123	0	74
554	Membrane Transport	Cryobacterium_sp_MLB-32	253	109	1	28
555	Membrane Transport	Cryobacterium_roopkundense_RuG17	254	123	0	14
556	Membrane Transport	Cryobacterium_sp_M96	289	97	0	5
557	Membrane Transport	Cryobacterium_sp_M23	293	96	0	2
558	Membrane Transport	Cryobacterium_sp_M25	293	97	0	1
559	Membrane Transport	Cryobacterium_sp_N22	278	92	0	21
560	Membrane Transport	Cryobacterium_arcticum_PAMC_27867	278	100	0	13
561	Membrane Transport	Cryobacterium_psychrotolerans_CGMCC_1	242	88	1	60
562	Membrane Transport	Cryobacterium_mesophilum_CGMCC_1	228	71	0	92
563	Membrane Transport	Agromyces_italicus_DSM_16388	271	88	0	32
564	Membrane Transport	Agromyces_subbeticus_DSM_16689	271	110	0	10
565	Membrane Transport	Humibacter_albus_DSM_18994	231	57	0	103
566	Membrane Transport	Microbacterium_indicum_DSM_19969	280	84	1	26
567	Membrane Transport	Microbacterium_gubbeenense_DSM_15944	281	86	0	24
568	Membrane Transport	Microbacterium_luticocti_DSM_19459	255	90	1	45
569	Membrane Transport	Leucobacter_chironomi_DSM_19883	283	63	0	45
570	Membrane Transport	Agrococcus_lahaulensis_DSM_17612	310	57	0	24
571	Membrane Transport	Gulosibacter_molinativorax_DSM_13485	339	52	0	0
572	Membrane Transport	1	241	147	1	2
573	Membrane Transport	2	230	141	8	12
574	Membrane Transport	3	207	151	2	31
575	Membrane Transport	4	251	122	0	18
576	Membrane Transport	5	238	137	3	13
577	Membrane Transport	6	208	149	1	33
578	Membrane Transport	7	183	176	6	26
579	Membrane Transport	8	228	120	6	37
580	Membrane Transport	9	228	131	6	26
581	Membrane Transport	10	186	154	3	48
582	Membrane Transport	11	175	183	19	14
583	Membrane Transport	12	187	183	14	7
584	Membrane Transport	13	196	132	5	58
585	Membrane Transport	14	178	168	22	23
586	Membrane Transport	15	288	97	1	5
587	Membrane Transport	16	250	97	5	39
588	Membrane Transport	17	252	110	3	26
589	Membrane Transport	18	243	136	0	12
590	Membrane Transport	19	197	145	3	46
591	Membrane Transport	20	195	158	33	5
592	Membrane Transport	21	212	163	0	16
593	Membrane Transport	22	208	116	4	63
594	Membrane Transport	23	209	157	22	3
595	Membrane Transport	24	225	152	8	6
596	Membrane Transport	25	252	106	4	29
597	Membrane Transport	26	226	128	7	30
598	Membrane Transport	27	230	105	53	3
599	Membrane Transport	28	282	80	28	1
600	Membrane Transport	29	310	52	29	0
601	Metabolism of Aromatic Compounds	Cryobacterium_flavum_CGMCC_1	27	21	0	0
602	Metabolism of Aromatic Compounds	Cryobacterium_sp_N19	27	21	0	0
603	Metabolism of Aromatic Compounds	Cryobacterium_sp_N21	27	21	0	0
604	Metabolism of Aromatic Compounds	Cryobacterium_luteum_CGMCC_1	27	19	0	2
605	Metabolism of Aromatic Compounds	Cryobacterium_sp_Y29	35	13	0	0
606	Metabolism of Aromatic Compounds	Cryobacterium_sp_M15	35	11	0	2
607	Metabolism of Aromatic Compounds	Cryobacterium_sp_Y57	32	15	0	1
608	Metabolism of Aromatic Compounds	Cryobacterium_sp_Y82	25	18	0	5
609	Metabolism of Aromatic Compounds	Cryobacterium_levicorallinum_CGMCC_1	24	23	0	1
610	Metabolism of Aromatic Compounds	Cryobacterium_sp_M91	24	20	0	4
611	Metabolism of Aromatic Compounds	Cryobacterium_sp_Y62	22	25	0	1
612	Metabolism of Aromatic Compounds	Cryobacterium_sp_Y50	22	25	0	1
613	Metabolism of Aromatic Compounds	Cryobacterium_sp_Y11	20	14	0	14
614	Metabolism of Aromatic Compounds	Cryobacterium_sp_MLB-32	28	18	0	2
615	Metabolism of Aromatic Compounds	Cryobacterium_roopkundense_RuG17	28	19	0	1
616	Metabolism of Aromatic Compounds	Cryobacterium_sp_M96	34	14	0	0
617	Metabolism of Aromatic Compounds	Cryobacterium_sp_M23	35	13	0	0
618	Metabolism of Aromatic Compounds	Cryobacterium_sp_M25	35	13	0	0
619	Metabolism of Aromatic Compounds	Cryobacterium_sp_N22	41	4	0	3
620	Metabolism of Aromatic Compounds	Cryobacterium_arcticum_PAMC_27867	41	7	0	0
621	Metabolism of Aromatic Compounds	Cryobacterium_psychrotolerans_CGMCC_1	31	10	0	7
622	Metabolism of Aromatic Compounds	Cryobacterium_mesophilum_CGMCC_1	30	12	0	6
623	Metabolism of Aromatic Compounds	Agromyces_italicus_DSM_16388	31	14	0	3
624	Metabolism of Aromatic Compounds	Agromyces_subbeticus_DSM_16689	31	15	0	2
625	Metabolism of Aromatic Compounds	Humibacter_albus_DSM_18994	30	10	0	8
626	Metabolism of Aromatic Compounds	Microbacterium_indicum_DSM_19969	44	4	0	0
627	Metabolism of Aromatic Compounds	Microbacterium_gubbeenense_DSM_15944	44	1	0	3
628	Metabolism of Aromatic Compounds	Microbacterium_luticocti_DSM_19459	34	12	0	2
629	Metabolism of Aromatic Compounds	Leucobacter_chironomi_DSM_19883	35	7	0	6
630	Metabolism of Aromatic Compounds	Agrococcus_lahaulensis_DSM_17612	36	9	0	3
631	Metabolism of Aromatic Compounds	Gulosibacter_molinativorax_DSM_13485	38	10	0	0
632	Metabolism of Aromatic Compounds	1	27	21	0	0
633	Metabolism of Aromatic Compounds	2	27	21	0	0
634	Metabolism of Aromatic Compounds	3	23	21	0	4
635	Metabolism of Aromatic Compounds	4	32	13	0	3
636	Metabolism of Aromatic Compounds	5	25	16	0	7
637	Metabolism of Aromatic Compounds	6	23	23	0	2
638	Metabolism of Aromatic Compounds	7	19	25	0	4
639	Metabolism of Aromatic Compounds	8	22	24	0	2
640	Metabolism of Aromatic Compounds	9	20	24	2	2
641	Metabolism of Aromatic Compounds	10	18	25	1	4
642	Metabolism of Aromatic Compounds	11	19	28	1	0
643	Metabolism of Aromatic Compounds	12	20	25	3	0
644	Metabolism of Aromatic Compounds	13	22	19	1	6
645	Metabolism of Aromatic Compounds	14	21	20	5	2
646	Metabolism of Aromatic Compounds	15	34	13	0	1
647	Metabolism of Aromatic Compounds	16	31	14	0	3
648	Metabolism of Aromatic Compounds	17	31	7	0	10
649	Metabolism of Aromatic Compounds	18	31	17	0	0
650	Metabolism of Aromatic Compounds	19	26	17	0	5
651	Metabolism of Aromatic Compounds	20	25	17	5	1
652	Metabolism of Aromatic Compounds	21	28	18	0	2
653	Metabolism of Aromatic Compounds	22	26	15	2	5
654	Metabolism of Aromatic Compounds	23	28	18	2	0
655	Metabolism of Aromatic Compounds	24	30	17	1	0
656	Metabolism of Aromatic Compounds	25	34	4	0	10
657	Metabolism of Aromatic Compounds	26	31	14	0	3
658	Metabolism of Aromatic Compounds	27	31	13	4	0
659	Metabolism of Aromatic Compounds	28	35	12	1	0
660	Metabolism of Aromatic Compounds	29	36	10	2	0
661	Miscellaneous	Cryobacterium_flavum_CGMCC_1	76	59	0	2
662	Miscellaneous	Cryobacterium_sp_N19	77	60	0	0
663	Miscellaneous	Cryobacterium_sp_N21	77	60	0	0
664	Miscellaneous	Cryobacterium_luteum_CGMCC_1	73	44	0	20
665	Miscellaneous	Cryobacterium_sp_Y29	79	48	0	10
666	Miscellaneous	Cryobacterium_sp_M15	79	49	0	9
667	Miscellaneous	Cryobacterium_sp_Y57	69	50	0	18
668	Miscellaneous	Cryobacterium_sp_Y82	65	45	0	27
669	Miscellaneous	Cryobacterium_levicorallinum_CGMCC_1	75	60	0	2
670	Miscellaneous	Cryobacterium_sp_M91	75	57	0	5
671	Miscellaneous	Cryobacterium_sp_Y62	80	56	0	1
672	Miscellaneous	Cryobacterium_sp_Y50	80	54	0	3
673	Miscellaneous	Cryobacterium_sp_Y11	62	47	0	28
674	Miscellaneous	Cryobacterium_sp_MLB-32	67	62	0	8
675	Miscellaneous	Cryobacterium_roopkundense_RuG17	67	54	0	16
676	Miscellaneous	Cryobacterium_sp_M96	93	40	0	4
677	Miscellaneous	Cryobacterium_sp_M23	93	41	0	3
678	Miscellaneous	Cryobacterium_sp_M25	93	43	0	1
679	Miscellaneous	Cryobacterium_sp_N22	84	46	0	7
680	Miscellaneous	Cryobacterium_arcticum_PAMC_27867	84	51	0	2
681	Miscellaneous	Cryobacterium_psychrotolerans_CGMCC_1	82	38	0	17
682	Miscellaneous	Cryobacterium_mesophilum_CGMCC_1	86	27	0	24
683	Miscellaneous	Agromyces_italicus_DSM_16388	100	35	0	2
684	Miscellaneous	Agromyces_subbeticus_DSM_16689	100	36	0	1
685	Miscellaneous	Humibacter_albus_DSM_18994	90	33	0	14
686	Miscellaneous	Microbacterium_indicum_DSM_19969	111	21	0	5
687	Miscellaneous	Microbacterium_gubbeenense_DSM_15944	111	24	0	2
688	Miscellaneous	Microbacterium_luticocti_DSM_19459	103	26	0	8
689	Miscellaneous	Leucobacter_chironomi_DSM_19883	100	26	0	11
690	Miscellaneous	Agrococcus_lahaulensis_DSM_17612	106	23	0	8
691	Miscellaneous	Gulosibacter_molinativorax_DSM_13485	112	24	1	0
692	Miscellaneous	1	76	60	0	1
693	Miscellaneous	2	72	60	1	4
694	Miscellaneous	3	57	64	0	16
695	Miscellaneous	4	69	58	0	10
696	Miscellaneous	5	65	68	0	4
697	Miscellaneous	6	57	72	0	8
698	Miscellaneous	7	56	77	3	1
699	Miscellaneous	8	71	60	2	4
700	Miscellaneous	9	71	55	2	9
701	Miscellaneous	10	58	63	1	15
702	Miscellaneous	11	58	74	4	1
703	Miscellaneous	12	58	71	4	4
704	Miscellaneous	13	59	67	3	8
705	Miscellaneous	14	57	54	21	5
706	Miscellaneous	15	92	43	1	1
707	Miscellaneous	16	83	43	1	10
708	Miscellaneous	17	80	49	4	4
709	Miscellaneous	18	81	52	1	3
710	Miscellaneous	19	78	55	0	4
711	Miscellaneous	20	77	50	9	1
712	Miscellaneous	21	86	49	2	0
713	Miscellaneous	22	85	34	3	15
714	Miscellaneous	23	86	45	4	2
715	Miscellaneous	24	90	43	4	0
716	Miscellaneous	25	103	26	0	8
717	Miscellaneous	26	94	34	0	9
718	Miscellaneous	27	92	35	8	2
719	Miscellaneous	28	100	31	6	0
720	Miscellaneous	29	106	24	7	0
721	Motility and Chemotaxis	Cryobacterium_flavum_CGMCC_1	15	27	0	1
722	Motility and Chemotaxis	Cryobacterium_sp_N19	15	28	0	0
723	Motility and Chemotaxis	Cryobacterium_sp_N21	15	27	0	1
724	Motility and Chemotaxis	Cryobacterium_luteum_CGMCC_1	15	27	0	1
725	Motility and Chemotaxis	Cryobacterium_sp_Y29	14	28	0	1
726	Motility and Chemotaxis	Cryobacterium_sp_M15	14	27	0	2
727	Motility and Chemotaxis	Cryobacterium_sp_Y57	13	28	0	2
728	Motility and Chemotaxis	Cryobacterium_sp_Y82	12	29	0	2
729	Motility and Chemotaxis	Cryobacterium_levicorallinum_CGMCC_1	16	27	0	0
730	Motility and Chemotaxis	Cryobacterium_sp_M91	16	27	0	0
731	Motility and Chemotaxis	Cryobacterium_sp_Y62	15	28	0	0
732	Motility and Chemotaxis	Cryobacterium_sp_Y50	15	28	0	0
733	Motility and Chemotaxis	Cryobacterium_sp_Y11	15	26	0	2
734	Motility and Chemotaxis	Cryobacterium_sp_MLB-32	14	29	0	0
735	Motility and Chemotaxis	Cryobacterium_roopkundense_RuG17	14	27	0	2
736	Motility and Chemotaxis	Cryobacterium_sp_M96	15	25	0	3
737	Motility and Chemotaxis	Cryobacterium_sp_M23	15	28	0	0
738	Motility and Chemotaxis	Cryobacterium_sp_M25	15	24	0	4
739	Motility and Chemotaxis	Cryobacterium_sp_N22	16	27	0	0
740	Motility and Chemotaxis	Cryobacterium_arcticum_PAMC_27867	15	27	1	0
741	Motility and Chemotaxis	Cryobacterium_psychrotolerans_CGMCC_1	13	27	0	3
742	Motility and Chemotaxis	Cryobacterium_mesophilum_CGMCC_1	41	0	0	2
743	Motility and Chemotaxis	Agromyces_italicus_DSM_16388	40	1	0	2
744	Motility and Chemotaxis	Agromyces_subbeticus_DSM_16689	40	3	0	0
745	Motility and Chemotaxis	Humibacter_albus_DSM_18994	39	3	0	1
746	Motility and Chemotaxis	Microbacterium_indicum_DSM_19969	41	2	0	0
747	Motility and Chemotaxis	Microbacterium_gubbeenense_DSM_15944	41	2	0	0
748	Motility and Chemotaxis	Microbacterium_luticocti_DSM_19459	41	0	0	2
749	Motility and Chemotaxis	Leucobacter_chironomi_DSM_19883	42	1	0	0
750	Motility and Chemotaxis	Agrococcus_lahaulensis_DSM_17612	43	0	0	0
751	Motility and Chemotaxis	Gulosibacter_molinativorax_DSM_13485	43	0	0	0
752	Motility and Chemotaxis	1	15	28	0	0
753	Motility and Chemotaxis	2	15	28	0	0
754	Motility and Chemotaxis	3	12	27	1	3
755	Motility and Chemotaxis	4	13	29	0	1
756	Motility and Chemotaxis	5	12	30	0	1
757	Motility and Chemotaxis	6	12	30	1	0
758	Motility and Chemotaxis	7	13	30	0	0
759	Motility and Chemotaxis	8	15	27	0	1
760	Motility and Chemotaxis	9	15	28	0	0
761	Motility and Chemotaxis	10	13	28	0	2
762	Motility and Chemotaxis	11	13	28	2	0
763	Motility and Chemotaxis	12	13	27	1	2
764	Motility and Chemotaxis	13	12	27	2	2
765	Motility and Chemotaxis	14	13	29	0	1
766	Motility and Chemotaxis	15	15	28	0	0
767	Motility and Chemotaxis	16	15	28	0	0
768	Motility and Chemotaxis	17	15	27	0	1
769	Motility and Chemotaxis	18	12	27	1	3
770	Motility and Chemotaxis	19	13	30	0	0
771	Motility and Chemotaxis	20	13	2	28	0
772	Motility and Chemotaxis	21	39	2	0	2
773	Motility and Chemotaxis	22	39	3	0	1
774	Motility and Chemotaxis	23	39	4	0	0
775	Motility and Chemotaxis	24	39	3	1	0
776	Motility and Chemotaxis	25	41	2	0	0
777	Motility and Chemotaxis	26	40	2	0	1
778	Motility and Chemotaxis	27	40	1	2	0
779	Motility and Chemotaxis	28	42	0	1	0
780	Motility and Chemotaxis	29	43	0	0	0
781	Nitrogen Metabolism	Cryobacterium_flavum_CGMCC_1	28	14	0	2
782	Nitrogen Metabolism	Cryobacterium_sp_N19	29	15	0	0
783	Nitrogen Metabolism	Cryobacterium_sp_N21	29	14	0	1
784	Nitrogen Metabolism	Cryobacterium_luteum_CGMCC_1	24	17	1	2
785	Nitrogen Metabolism	Cryobacterium_sp_Y29	29	14	0	1
786	Nitrogen Metabolism	Cryobacterium_sp_M15	29	14	0	1
787	Nitrogen Metabolism	Cryobacterium_sp_Y57	28	15	0	1
788	Nitrogen Metabolism	Cryobacterium_sp_Y82	24	20	0	0
789	Nitrogen Metabolism	Cryobacterium_levicorallinum_CGMCC_1	25	17	0	2
790	Nitrogen Metabolism	Cryobacterium_sp_M91	25	16	0	3
791	Nitrogen Metabolism	Cryobacterium_sp_Y62	29	15	0	0
792	Nitrogen Metabolism	Cryobacterium_sp_Y50	29	15	0	0
793	Nitrogen Metabolism	Cryobacterium_sp_Y11	23	15	0	6
794	Nitrogen Metabolism	Cryobacterium_sp_MLB-32	29	13	0	2
795	Nitrogen Metabolism	Cryobacterium_roopkundense_RuG17	29	12	0	3
796	Nitrogen Metabolism	Cryobacterium_sp_M96	26	18	0	0
797	Nitrogen Metabolism	Cryobacterium_sp_M23	27	17	0	0
798	Nitrogen Metabolism	Cryobacterium_sp_M25	27	17	0	0
799	Nitrogen Metabolism	Cryobacterium_sp_N22	29	15	0	0
800	Nitrogen Metabolism	Cryobacterium_arcticum_PAMC_27867	29	11	0	4
801	Nitrogen Metabolism	Cryobacterium_psychrotolerans_CGMCC_1	27	10	0	7
802	Nitrogen Metabolism	Cryobacterium_mesophilum_CGMCC_1	30	9	0	5
803	Nitrogen Metabolism	Agromyces_italicus_DSM_16388	32	11	0	1
804	Nitrogen Metabolism	Agromyces_subbeticus_DSM_16689	32	7	0	5
805	Nitrogen Metabolism	Humibacter_albus_DSM_18994	29	12	0	3
806	Nitrogen Metabolism	Microbacterium_indicum_DSM_19969	39	5	0	0
807	Nitrogen Metabolism	Microbacterium_gubbeenense_DSM_15944	39	5	0	0
808	Nitrogen Metabolism	Microbacterium_luticocti_DSM_19459	33	10	0	1
809	Nitrogen Metabolism	Leucobacter_chironomi_DSM_19883	34	6	0	4
810	Nitrogen Metabolism	Agrococcus_lahaulensis_DSM_17612	35	4	0	5
811	Nitrogen Metabolism	Gulosibacter_molinativorax_DSM_13485	35	9	0	0
812	Nitrogen Metabolism	1	28	15	0	1
813	Nitrogen Metabolism	2	23	14	2	5
814	Nitrogen Metabolism	3	21	19	0	4
815	Nitrogen Metabolism	4	28	15	0	1
816	Nitrogen Metabolism	5	24	16	0	4
817	Nitrogen Metabolism	6	21	20	0	3
818	Nitrogen Metabolism	7	21	23	0	0
819	Nitrogen Metabolism	8	24	19	0	1
820	Nitrogen Metabolism	9	22	13	2	7
821	Nitrogen Metabolism	10	20	19	1	4
822	Nitrogen Metabolism	11	21	21	2	0
823	Nitrogen Metabolism	12	23	21	0	0
824	Nitrogen Metabolism	13	23	15	0	6
825	Nitrogen Metabolism	14	23	19	2	0
826	Nitrogen Metabolism	15	26	17	0	1
827	Nitrogen Metabolism	16	25	17	1	1
828	Nitrogen Metabolism	17	26	15	0	3
829	Nitrogen Metabolism	18	26	17	1	0
830	Nitrogen Metabolism	19	25	17	0	2
831	Nitrogen Metabolism	20	25	14	5	0
832	Nitrogen Metabolism	21	29	14	0	1
833	Nitrogen Metabolism	22	29	12	0	3
834	Nitrogen Metabolism	23	29	15	0	0
835	Nitrogen Metabolism	24	29	13	2	0
836	Nitrogen Metabolism	25	33	5	0	6
837	Nitrogen Metabolism	26	31	11	0	2
838	Nitrogen Metabolism	27	30	9	4	1
839	Nitrogen Metabolism	28	34	9	1	0
840	Nitrogen Metabolism	29	35	9	0	0
841	Nucleosides and Nucleotides	Cryobacterium_flavum_CGMCC_1	137	101	0	6
842	Nucleosides and Nucleotides	Cryobacterium_sp_N19	139	100	0	5
843	Nucleosides and Nucleotides	Cryobacterium_sp_N21	139	99	0	6
844	Nucleosides and Nucleotides	Cryobacterium_luteum_CGMCC_1	138	87	1	18
845	Nucleosides and Nucleotides	Cryobacterium_sp_Y29	152	85	0	7
846	Nucleosides and Nucleotides	Cryobacterium_sp_M15	152	86	0	6
847	Nucleosides and Nucleotides	Cryobacterium_sp_Y57	149	85	0	10
848	Nucleosides and Nucleotides	Cryobacterium_sp_Y82	144	82	0	18
849	Nucleosides and Nucleotides	Cryobacterium_levicorallinum_CGMCC_1	152	87	0	5
850	Nucleosides and Nucleotides	Cryobacterium_sp_M91	152	91	0	1
851	Nucleosides and Nucleotides	Cryobacterium_sp_Y62	146	95	0	3
852	Nucleosides and Nucleotides	Cryobacterium_sp_Y50	146	94	0	4
853	Nucleosides and Nucleotides	Cryobacterium_sp_Y11	118	93	1	32
854	Nucleosides and Nucleotides	Cryobacterium_sp_MLB-32	141	86	1	16
855	Nucleosides and Nucleotides	Cryobacterium_roopkundense_RuG17	142	92	0	10
856	Nucleosides and Nucleotides	Cryobacterium_sp_M96	155	87	0	2
857	Nucleosides and Nucleotides	Cryobacterium_sp_M23	156	88	0	0
858	Nucleosides and Nucleotides	Cryobacterium_sp_M25	156	84	0	4
859	Nucleosides and Nucleotides	Cryobacterium_sp_N22	140	99	0	5
860	Nucleosides and Nucleotides	Cryobacterium_arcticum_PAMC_27867	140	99	0	5
861	Nucleosides and Nucleotides	Cryobacterium_psychrotolerans_CGMCC_1	123	85	0	36
862	Nucleosides and Nucleotides	Cryobacterium_mesophilum_CGMCC_1	134	59	0	51
863	Nucleosides and Nucleotides	Agromyces_italicus_DSM_16388	149	81	1	13
864	Nucleosides and Nucleotides	Agromyces_subbeticus_DSM_16689	150	89	0	5
865	Nucleosides and Nucleotides	Humibacter_albus_DSM_18994	147	63	0	34
866	Nucleosides and Nucleotides	Microbacterium_indicum_DSM_19969	169	67	0	8
867	Nucleosides and Nucleotides	Microbacterium_gubbeenense_DSM_15944	169	63	0	12
868	Nucleosides and Nucleotides	Microbacterium_luticocti_DSM_19459	164	60	0	20
869	Nucleosides and Nucleotides	Leucobacter_chironomi_DSM_19883	168	63	0	13
870	Nucleosides and Nucleotides	Agrococcus_lahaulensis_DSM_17612	172	62	0	10
871	Nucleosides and Nucleotides	Gulosibacter_molinativorax_DSM_13485	182	62	0	0
872	Nucleosides and Nucleotides	1	137	105	0	2
873	Nucleosides and Nucleotides	2	132	100	7	5
874	Nucleosides and Nucleotides	3	126	104	1	13
875	Nucleosides and Nucleotides	4	149	92	0	3
876	Nucleosides and Nucleotides	5	143	94	1	6
877	Nucleosides and Nucleotides	6	127	100	0	17
878	Nucleosides and Nucleotides	7	120	115	2	7
879	Nucleosides and Nucleotides	8	140	89	3	12
880	Nucleosides and Nucleotides	9	141	96	2	5
881	Nucleosides and Nucleotides	10	121	100	1	22
882	Nucleosides and Nucleotides	11	117	120	2	5
883	Nucleosides and Nucleotides	12	112	120	5	7
884	Nucleosides and Nucleotides	13	116	101	1	26
885	Nucleosides and Nucleotides	14	104	118	9	13
886	Nucleosides and Nucleotides	15	155	88	0	1
887	Nucleosides and Nucleotides	16	136	89	0	19
888	Nucleosides and Nucleotides	17	132	100	4	8
889	Nucleosides and Nucleotides	18	123	108	0	13
890	Nucleosides and Nucleotides	19	111	119	2	12
891	Nucleosides and Nucleotides	20	109	106	25	4
892	Nucleosides and Nucleotides	21	129	107	3	5
893	Nucleosides and Nucleotides	22	129	91	3	21
894	Nucleosides and Nucleotides	23	130	95	17	2
895	Nucleosides and Nucleotides	24	144	93	4	3
896	Nucleosides and Nucleotides	25	161	72	3	8
897	Nucleosides and Nucleotides	26	147	79	1	17
898	Nucleosides and Nucleotides	27	148	76	20	0
899	Nucleosides and Nucleotides	28	168	72	4	0
900	Nucleosides and Nucleotides	29	172	62	10	0
901	Phages, Prophages, Transposable elements, Plasmids	Cryobacterium_flavum_CGMCC_1	14	0	0	0
902	Phages, Prophages, Transposable elements, Plasmids	Cryobacterium_sp_N19	14	0	0	0
903	Phages, Prophages, Transposable elements, Plasmids	Cryobacterium_sp_N21	14	0	0	0
904	Phages, Prophages, Transposable elements, Plasmids	Cryobacterium_luteum_CGMCC_1	11	3	0	0
905	Phages, Prophages, Transposable elements, Plasmids	Cryobacterium_sp_Y29	13	1	0	0
906	Phages, Prophages, Transposable elements, Plasmids	Cryobacterium_sp_M15	13	1	0	0
907	Phages, Prophages, Transposable elements, Plasmids	Cryobacterium_sp_Y57	6	7	1	0
908	Phages, Prophages, Transposable elements, Plasmids	Cryobacterium_sp_Y82	7	1	0	6
909	Phages, Prophages, Transposable elements, Plasmids	Cryobacterium_levicorallinum_CGMCC_1	9	5	0	0
910	Phages, Prophages, Transposable elements, Plasmids	Cryobacterium_sp_M91	9	1	0	4
911	Phages, Prophages, Transposable elements, Plasmids	Cryobacterium_sp_Y62	10	3	0	1
912	Phages, Prophages, Transposable elements, Plasmids	Cryobacterium_sp_Y50	10	3	0	1
913	Phages, Prophages, Transposable elements, Plasmids	Cryobacterium_sp_Y11	9	1	0	4
914	Phages, Prophages, Transposable elements, Plasmids	Cryobacterium_sp_MLB-32	11	2	0	1
915	Phages, Prophages, Transposable elements, Plasmids	Cryobacterium_roopkundense_RuG17	11	3	0	0
916	Phages, Prophages, Transposable elements, Plasmids	Cryobacterium_sp_M96	12	0	0	2
917	Phages, Prophages, Transposable elements, Plasmids	Cryobacterium_sp_M23	12	2	0	0
918	Phages, Prophages, Transposable elements, Plasmids	Cryobacterium_sp_M25	12	0	0	2
919	Phages, Prophages, Transposable elements, Plasmids	Cryobacterium_sp_N22	13	0	0	1
920	Phages, Prophages, Transposable elements, Plasmids	Cryobacterium_arcticum_PAMC_27867	13	1	0	0
921	Phages, Prophages, Transposable elements, Plasmids	Cryobacterium_psychrotolerans_CGMCC_1	11	0	0	3
922	Phages, Prophages, Transposable elements, Plasmids	Cryobacterium_mesophilum_CGMCC_1	11	0	0	3
923	Phages, Prophages, Transposable elements, Plasmids	Agromyces_italicus_DSM_16388	14	0	0	0
924	Phages, Prophages, Transposable elements, Plasmids	Agromyces_subbeticus_DSM_16689	14	0	0	0
925	Phages, Prophages, Transposable elements, Plasmids	Humibacter_albus_DSM_18994	11	0	0	3
926	Phages, Prophages, Transposable elements, Plasmids	Microbacterium_indicum_DSM_19969	10	2	0	2
927	Phages, Prophages, Transposable elements, Plasmids	Microbacterium_gubbeenense_DSM_15944	10	4	0	0
928	Phages, Prophages, Transposable elements, Plasmids	Microbacterium_luticocti_DSM_19459	12	0	0	2
929	Phages, Prophages, Transposable elements, Plasmids	Leucobacter_chironomi_DSM_19883	13	0	0	1
930	Phages, Prophages, Transposable elements, Plasmids	Agrococcus_lahaulensis_DSM_17612	13	0	0	1
931	Phages, Prophages, Transposable elements, Plasmids	Gulosibacter_molinativorax_DSM_13485	12	1	1	0
932	Phages, Prophages, Transposable elements, Plasmids	1	14	0	0	0
933	Phages, Prophages, Transposable elements, Plasmids	2	11	0	0	3
934	Phages, Prophages, Transposable elements, Plasmids	3	7	3	0	4
935	Phages, Prophages, Transposable elements, Plasmids	4	7	1	0	6
936	Phages, Prophages, Transposable elements, Plasmids	5	7	7	0	0
937	Phages, Prophages, Transposable elements, Plasmids	6	7	7	0	0
938	Phages, Prophages, Transposable elements, Plasmids	7	7	7	0	0
939	Phages, Prophages, Transposable elements, Plasmids	8	7	4	1	2
940	Phages, Prophages, Transposable elements, Plasmids	9	7	3	1	3
941	Phages, Prophages, Transposable elements, Plasmids	10	6	5	1	2
942	Phages, Prophages, Transposable elements, Plasmids	11	7	5	2	0
943	Phages, Prophages, Transposable elements, Plasmids	12	9	4	1	0
944	Phages, Prophages, Transposable elements, Plasmids	13	10	3	0	1
945	Phages, Prophages, Transposable elements, Plasmids	14	10	3	1	0
946	Phages, Prophages, Transposable elements, Plasmids	15	12	2	0	0
947	Phages, Prophages, Transposable elements, Plasmids	16	11	2	0	1
948	Phages, Prophages, Transposable elements, Plasmids	17	11	1	0	2
949	Phages, Prophages, Transposable elements, Plasmids	18	11	3	0	0
950	Phages, Prophages, Transposable elements, Plasmids	19	11	3	0	0
951	Phages, Prophages, Transposable elements, Plasmids	20	11	3	0	0
952	Phages, Prophages, Transposable elements, Plasmids	21	11	3	0	0
953	Phages, Prophages, Transposable elements, Plasmids	22	11	0	0	3
954	Phages, Prophages, Transposable elements, Plasmids	23	11	3	0	0
955	Phages, Prophages, Transposable elements, Plasmids	24	11	3	0	0
956	Phages, Prophages, Transposable elements, Plasmids	25	10	2	2	0
957	Phages, Prophages, Transposable elements, Plasmids	26	11	2	0	1
958	Phages, Prophages, Transposable elements, Plasmids	27	11	1	2	0
959	Phages, Prophages, Transposable elements, Plasmids	28	13	1	0	0
960	Phages, Prophages, Transposable elements, Plasmids	29	13	1	0	0
961	Phosphorus Metabolism	Cryobacterium_flavum_CGMCC_1	43	28	0	0
962	Phosphorus Metabolism	Cryobacterium_sp_N19	45	22	0	4
963	Phosphorus Metabolism	Cryobacterium_sp_N21	45	26	0	0
964	Phosphorus Metabolism	Cryobacterium_luteum_CGMCC_1	43	27	0	1
965	Phosphorus Metabolism	Cryobacterium_sp_Y29	51	19	0	1
966	Phosphorus Metabolism	Cryobacterium_sp_M15	51	19	0	1
967	Phosphorus Metabolism	Cryobacterium_sp_Y57	50	20	0	1
968	Phosphorus Metabolism	Cryobacterium_sp_Y82	37	28	0	6
969	Phosphorus Metabolism	Cryobacterium_levicorallinum_CGMCC_1	44	27	0	0
970	Phosphorus Metabolism	Cryobacterium_sp_M91	44	25	0	2
971	Phosphorus Metabolism	Cryobacterium_sp_Y62	42	28	0	1
972	Phosphorus Metabolism	Cryobacterium_sp_Y50	42	29	0	0
973	Phosphorus Metabolism	Cryobacterium_sp_Y11	30	35	0	6
974	Phosphorus Metabolism	Cryobacterium_sp_MLB-32	41	28	0	2
975	Phosphorus Metabolism	Cryobacterium_roopkundense_RuG17	41	26	0	4
976	Phosphorus Metabolism	Cryobacterium_sp_M96	48	23	0	0
977	Phosphorus Metabolism	Cryobacterium_sp_M23	47	24	0	0
978	Phosphorus Metabolism	Cryobacterium_sp_M25	47	24	0	0
979	Phosphorus Metabolism	Cryobacterium_sp_N22	43	23	0	5
980	Phosphorus Metabolism	Cryobacterium_arcticum_PAMC_27867	43	28	0	0
981	Phosphorus Metabolism	Cryobacterium_psychrotolerans_CGMCC_1	42	20	0	9
982	Phosphorus Metabolism	Cryobacterium_mesophilum_CGMCC_1	38	16	0	17
983	Phosphorus Metabolism	Agromyces_italicus_DSM_16388	43	21	0	7
984	Phosphorus Metabolism	Agromyces_subbeticus_DSM_16689	42	22	1	6
985	Phosphorus Metabolism	Humibacter_albus_DSM_18994	47	14	1	9
986	Phosphorus Metabolism	Microbacterium_indicum_DSM_19969	54	17	0	0
987	Phosphorus Metabolism	Microbacterium_gubbeenense_DSM_15944	54	15	0	2
988	Phosphorus Metabolism	Microbacterium_luticocti_DSM_19459	50	19	0	2
989	Phosphorus Metabolism	Leucobacter_chironomi_DSM_19883	55	14	0	2
990	Phosphorus Metabolism	Agrococcus_lahaulensis_DSM_17612	56	13	0	2
991	Phosphorus Metabolism	Gulosibacter_molinativorax_DSM_13485	58	13	0	0
992	Phosphorus Metabolism	1	43	26	0	2
993	Phosphorus Metabolism	2	43	28	0	0
994	Phosphorus Metabolism	3	32	28	0	11
995	Phosphorus Metabolism	4	50	20	0	1
996	Phosphorus Metabolism	5	37	21	0	13
997	Phosphorus Metabolism	6	32	34	0	5
998	Phosphorus Metabolism	7	28	38	1	4
999	Phosphorus Metabolism	8	39	26	1	5
1000	Phosphorus Metabolism	9	39	28	1	3
1001	Phosphorus Metabolism	10	29	31	0	11
1002	Phosphorus Metabolism	11	29	41	1	0
1003	Phosphorus Metabolism	12	26	30	11	4
1004	Phosphorus Metabolism	13	37	30	0	4
1005	Phosphorus Metabolism	14	35	33	1	2
1006	Phosphorus Metabolism	15	47	23	1	0
1007	Phosphorus Metabolism	16	44	23	0	4
1008	Phosphorus Metabolism	17	42	26	2	1
1009	Phosphorus Metabolism	18	42	27	0	2
1010	Phosphorus Metabolism	19	36	29	0	6
1011	Phosphorus Metabolism	20	36	33	2	0
1012	Phosphorus Metabolism	21	37	33	0	1
1013	Phosphorus Metabolism	22	37	28	0	6
1014	Phosphorus Metabolism	23	37	23	11	0
1015	Phosphorus Metabolism	24	48	22	1	0
1016	Phosphorus Metabolism	25	50	17	0	4
1017	Phosphorus Metabolism	26	48	20	1	2
1018	Phosphorus Metabolism	27	49	16	6	0
1019	Phosphorus Metabolism	28	55	15	1	0
1020	Phosphorus Metabolism	29	56	13	2	0
1021	Photosynthesis	Cryobacterium_flavum_CGMCC_1	4	8	0	1
1022	Photosynthesis	Cryobacterium_sp_N19	4	8	0	1
1023	Photosynthesis	Cryobacterium_sp_N21	4	8	0	1
1024	Photosynthesis	Cryobacterium_luteum_CGMCC_1	5	4	0	4
1025	Photosynthesis	Cryobacterium_sp_Y29	6	5	0	2
1026	Photosynthesis	Cryobacterium_sp_M15	6	6	0	1
1027	Photosynthesis	Cryobacterium_sp_Y57	5	8	0	0
1028	Photosynthesis	Cryobacterium_sp_Y82	4	6	0	3
1029	Photosynthesis	Cryobacterium_levicorallinum_CGMCC_1	4	8	0	1
1030	Photosynthesis	Cryobacterium_sp_M91	4	9	0	0
1031	Photosynthesis	Cryobacterium_sp_Y62	7	6	0	0
1032	Photosynthesis	Cryobacterium_sp_Y50	7	6	0	0
1033	Photosynthesis	Cryobacterium_sp_Y11	4	5	0	4
1034	Photosynthesis	Cryobacterium_sp_MLB-32	6	6	0	1
1035	Photosynthesis	Cryobacterium_roopkundense_RuG17	6	5	0	2
1036	Photosynthesis	Cryobacterium_sp_M96	7	5	0	1
1037	Photosynthesis	Cryobacterium_sp_M23	7	6	0	0
1038	Photosynthesis	Cryobacterium_sp_M25	7	5	0	1
1039	Photosynthesis	Cryobacterium_sp_N22	9	2	0	2
1040	Photosynthesis	Cryobacterium_arcticum_PAMC_27867	9	3	0	1
1041	Photosynthesis	Cryobacterium_psychrotolerans_CGMCC_1	6	1	0	6
1042	Photosynthesis	Cryobacterium_mesophilum_CGMCC_1	11	0	0	2
1043	Photosynthesis	Agromyces_italicus_DSM_16388	13	0	0	0
1044	Photosynthesis	Agromyces_subbeticus_DSM_16689	13	0	0	0
1045	Photosynthesis	Humibacter_albus_DSM_18994	11	1	0	1
1046	Photosynthesis	Microbacterium_indicum_DSM_19969	13	0	0	0
1047	Photosynthesis	Microbacterium_gubbeenense_DSM_15944	13	0	0	0
1048	Photosynthesis	Microbacterium_luticocti_DSM_19459	13	0	0	0
1049	Photosynthesis	Leucobacter_chironomi_DSM_19883	12	0	0	1
1050	Photosynthesis	Agrococcus_lahaulensis_DSM_17612	12	0	0	1
1051	Photosynthesis	Gulosibacter_molinativorax_DSM_13485	12	1	0	0
1052	Photosynthesis	1	4	9	0	0
1053	Photosynthesis	2	4	8	1	0
1054	Photosynthesis	3	4	8	0	1
1055	Photosynthesis	4	5	7	0	1
1056	Photosynthesis	5	4	8	0	1
1057	Photosynthesis	6	4	9	0	0
1058	Photosynthesis	7	3	9	0	1
1059	Photosynthesis	8	3	8	1	1
1060	Photosynthesis	9	4	6	0	3
1061	Photosynthesis	10	3	9	0	1
1062	Photosynthesis	11	3	9	1	0
1063	Photosynthesis	12	4	9	0	0
1064	Photosynthesis	13	4	7	0	2
1065	Photosynthesis	14	4	7	2	0
1066	Photosynthesis	15	7	6	0	0
1067	Photosynthesis	16	5	5	1	2
1068	Photosynthesis	17	6	4	0	3
1069	Photosynthesis	18	6	7	0	0
1070	Photosynthesis	19	6	7	0	0
1071	Photosynthesis	20	6	2	5	0
1072	Photosynthesis	21	11	2	0	0
1073	Photosynthesis	22	11	0	0	2
1074	Photosynthesis	23	11	2	0	0
1075	Photosynthesis	24	11	1	1	0
1076	Photosynthesis	25	13	0	0	0
1077	Photosynthesis	26	12	0	0	1
1078	Photosynthesis	27	12	1	0	0
1079	Photosynthesis	28	12	1	0	0
1080	Photosynthesis	29	12	1	0	0
1081	Potassium metabolism	Cryobacterium_flavum_CGMCC_1	21	10	0	0
1082	Potassium metabolism	Cryobacterium_sp_N19	21	7	0	3
1083	Potassium metabolism	Cryobacterium_sp_N21	21	10	0	0
1084	Potassium metabolism	Cryobacterium_luteum_CGMCC_1	20	8	0	3
1085	Potassium metabolism	Cryobacterium_sp_Y29	24	6	0	1
1086	Potassium metabolism	Cryobacterium_sp_M15	24	6	0	1
1087	Potassium metabolism	Cryobacterium_sp_Y57	23	6	0	2
1088	Potassium metabolism	Cryobacterium_sp_Y82	24	5	0	2
1089	Potassium metabolism	Cryobacterium_levicorallinum_CGMCC_1	26	5	0	0
1090	Potassium metabolism	Cryobacterium_sp_M91	26	5	0	0
1091	Potassium metabolism	Cryobacterium_sp_Y62	26	4	0	1
1092	Potassium metabolism	Cryobacterium_sp_Y50	26	5	0	0
1093	Potassium metabolism	Cryobacterium_sp_Y11	22	6	0	3
1094	Potassium metabolism	Cryobacterium_sp_MLB-32	20	10	0	1
1095	Potassium metabolism	Cryobacterium_roopkundense_RuG17	20	10	0	1
1096	Potassium metabolism	Cryobacterium_sp_M96	26	4	0	1
1097	Potassium metabolism	Cryobacterium_sp_M23	26	5	0	0
1098	Potassium metabolism	Cryobacterium_sp_M25	26	4	0	1
1099	Potassium metabolism	Cryobacterium_sp_N22	21	10	0	0
1100	Potassium metabolism	Cryobacterium_arcticum_PAMC_27867	21	10	0	0
1101	Potassium metabolism	Cryobacterium_psychrotolerans_CGMCC_1	21	5	0	5
1102	Potassium metabolism	Cryobacterium_mesophilum_CGMCC_1	23	3	0	5
1103	Potassium metabolism	Agromyces_italicus_DSM_16388	18	11	0	2
1104	Potassium metabolism	Agromyces_subbeticus_DSM_16689	18	13	0	0
1105	Potassium metabolism	Humibacter_albus_DSM_18994	22	3	0	6
1106	Potassium metabolism	Microbacterium_indicum_DSM_19969	28	3	0	0
1107	Potassium metabolism	Microbacterium_gubbeenense_DSM_15944	28	3	0	0
1108	Potassium metabolism	Microbacterium_luticocti_DSM_19459	27	4	0	0
1109	Potassium metabolism	Leucobacter_chironomi_DSM_19883	22	5	0	4
1110	Potassium metabolism	Agrococcus_lahaulensis_DSM_17612	23	2	0	6
1111	Potassium metabolism	Gulosibacter_molinativorax_DSM_13485	23	8	0	0
1112	Potassium metabolism	1	21	10	0	0
1113	Potassium metabolism	2	20	10	0	1
1114	Potassium metabolism	3	20	9	2	0
1115	Potassium metabolism	4	23	7	0	1
1116	Potassium metabolism	5	23	7	1	0
1117	Potassium metabolism	6	22	7	0	2
1118	Potassium metabolism	7	22	9	0	0
1119	Potassium metabolism	8	26	5	0	0
1120	Potassium metabolism	9	26	5	0	0
1121	Potassium metabolism	10	22	5	0	4
1122	Potassium metabolism	11	22	9	0	0
1123	Potassium metabolism	12	19	8	1	3
1124	Potassium metabolism	13	20	11	0	0
1125	Potassium metabolism	14	20	10	1	0
1126	Potassium metabolism	15	26	5	0	0
1127	Potassium metabolism	16	21	5	0	5
1128	Potassium metabolism	17	20	9	1	1
1129	Potassium metabolism	18	21	10	0	0
1130	Potassium metabolism	19	21	10	0	0
1131	Potassium metabolism	20	21	8	2	0
1132	Potassium metabolism	21	21	8	0	2
1133	Potassium metabolism	22	18	10	3	0
1134	Potassium metabolism	23	21	9	1	0
1135	Potassium metabolism	24	22	9	0	0
1136	Potassium metabolism	25	27	3	0	1
1137	Potassium metabolism	26	21	3	1	6
1138	Potassium metabolism	27	22	9	0	0
1139	Potassium metabolism	28	22	8	1	0
1140	Potassium metabolism	29	23	8	0	0
1141	Protein Metabolism	Cryobacterium_flavum_CGMCC_1	178	140	0	8
1142	Protein Metabolism	Cryobacterium_sp_N19	182	140	0	4
1143	Protein Metabolism	Cryobacterium_sp_N21	182	137	0	7
1144	Protein Metabolism	Cryobacterium_luteum_CGMCC_1	175	130	0	21
1145	Protein Metabolism	Cryobacterium_sp_Y29	184	137	0	5
1146	Protein Metabolism	Cryobacterium_sp_M15	184	133	0	9
1147	Protein Metabolism	Cryobacterium_sp_Y57	180	135	0	11
1148	Protein Metabolism	Cryobacterium_sp_Y82	171	138	0	17
1149	Protein Metabolism	Cryobacterium_levicorallinum_CGMCC_1	182	134	0	10
1150	Protein Metabolism	Cryobacterium_sp_M91	182	139	0	5
1151	Protein Metabolism	Cryobacterium_sp_Y62	187	134	1	4
1152	Protein Metabolism	Cryobacterium_sp_Y50	188	135	0	3
1153	Protein Metabolism	Cryobacterium_sp_Y11	169	131	0	26
1154	Protein Metabolism	Cryobacterium_sp_MLB-32	170	145	0	11
1155	Protein Metabolism	Cryobacterium_roopkundense_RuG17	170	146	0	10
1156	Protein Metabolism	Cryobacterium_sp_M96	193	128	0	5
1157	Protein Metabolism	Cryobacterium_sp_M23	194	130	0	2
1158	Protein Metabolism	Cryobacterium_sp_M25	194	131	0	1
1159	Protein Metabolism	Cryobacterium_sp_N22	189	133	0	4
1160	Protein Metabolism	Cryobacterium_arcticum_PAMC_27867	189	132	0	5
1161	Protein Metabolism	Cryobacterium_psychrotolerans_CGMCC_1	164	138	0	24
1162	Protein Metabolism	Cryobacterium_mesophilum_CGMCC_1	174	113	0	39
1163	Protein Metabolism	Agromyces_italicus_DSM_16388	185	130	0	11
1164	Protein Metabolism	Agromyces_subbeticus_DSM_16689	185	135	0	6
1165	Protein Metabolism	Humibacter_albus_DSM_18994	175	126	0	25
1166	Protein Metabolism	Microbacterium_indicum_DSM_19969	201	114	1	10
1167	Protein Metabolism	Microbacterium_gubbeenense_DSM_15944	202	118	0	6
1168	Protein Metabolism	Microbacterium_luticocti_DSM_19459	191	114	1	20
1169	Protein Metabolism	Leucobacter_chironomi_DSM_19883	199	110	1	16
1170	Protein Metabolism	Agrococcus_lahaulensis_DSM_17612	207	107	0	12
1171	Protein Metabolism	Gulosibacter_molinativorax_DSM_13485	224	102	0	0
1172	Protein Metabolism	1	178	144	0	4
1173	Protein Metabolism	2	174	147	1	4
1174	Protein Metabolism	3	163	150	1	12
1175	Protein Metabolism	4	180	142	0	4
1176	Protein Metabolism	5	169	144	2	11
1177	Protein Metabolism	6	163	154	1	8
1178	Protein Metabolism	7	160	156	6	4
1179	Protein Metabolism	8	179	143	1	3
1180	Protein Metabolism	9	178	136	2	10
1181	Protein Metabolism	10	163	143	3	17
1182	Protein Metabolism	11	164	155	5	2
1183	Protein Metabolism	12	155	149	8	14
1184	Protein Metabolism	13	158	151	5	12
1185	Protein Metabolism	14	152	157	6	11
1186	Protein Metabolism	15	192	131	1	2
1187	Protein Metabolism	16	175	132	1	18
1188	Protein Metabolism	17	175	136	1	14
1189	Protein Metabolism	18	164	150	0	12
1190	Protein Metabolism	19	155	159	3	9
1191	Protein Metabolism	20	155	149	19	3
1192	Protein Metabolism	21	167	151	1	7
1193	Protein Metabolism	22	163	136	5	22
1194	Protein Metabolism	23	166	149	9	2
1195	Protein Metabolism	24	174	145	6	1
1196	Protein Metabolism	25	191	123	1	11
1197	Protein Metabolism	26	176	130	4	16
1198	Protein Metabolism	27	179	125	21	1
1199	Protein Metabolism	28	200	119	7	0
1200	Protein Metabolism	29	207	102	17	0
1201	Regulation and Cell signaling	Cryobacterium_flavum_CGMCC_1	58	26	0	2
1202	Regulation and Cell signaling	Cryobacterium_sp_N19	58	28	0	0
1203	Regulation and Cell signaling	Cryobacterium_sp_N21	58	26	0	2
1204	Regulation and Cell signaling	Cryobacterium_luteum_CGMCC_1	57	22	0	7
1205	Regulation and Cell signaling	Cryobacterium_sp_Y29	64	18	0	4
1206	Regulation and Cell signaling	Cryobacterium_sp_M15	64	18	0	4
1207	Regulation and Cell signaling	Cryobacterium_sp_Y57	56	25	0	5
1208	Regulation and Cell signaling	Cryobacterium_sp_Y82	51	26	0	9
1209	Regulation and Cell signaling	Cryobacterium_levicorallinum_CGMCC_1	57	27	0	2
1210	Regulation and Cell signaling	Cryobacterium_sp_M91	57	28	0	1
1211	Regulation and Cell signaling	Cryobacterium_sp_Y62	56	26	0	4
1212	Regulation and Cell signaling	Cryobacterium_sp_Y50	56	29	0	1
1213	Regulation and Cell signaling	Cryobacterium_sp_Y11	44	22	0	20
1214	Regulation and Cell signaling	Cryobacterium_sp_MLB-32	58	26	0	2
1215	Regulation and Cell signaling	Cryobacterium_roopkundense_RuG17	58	20	0	8
1216	Regulation and Cell signaling	Cryobacterium_sp_M96	70	14	0	2
1217	Regulation and Cell signaling	Cryobacterium_sp_M23	72	13	0	1
1218	Regulation and Cell signaling	Cryobacterium_sp_M25	72	13	0	1
1219	Regulation and Cell signaling	Cryobacterium_sp_N22	70	13	0	3
1220	Regulation and Cell signaling	Cryobacterium_arcticum_PAMC_27867	70	15	0	1
1221	Regulation and Cell signaling	Cryobacterium_psychrotolerans_CGMCC_1	63	16	0	7
1222	Regulation and Cell signaling	Cryobacterium_mesophilum_CGMCC_1	56	12	0	18
1223	Regulation and Cell signaling	Agromyces_italicus_DSM_16388	69	14	0	3
1224	Regulation and Cell signaling	Agromyces_subbeticus_DSM_16689	69	17	0	0
1225	Regulation and Cell signaling	Humibacter_albus_DSM_18994	57	14	3	12
1226	Regulation and Cell signaling	Microbacterium_indicum_DSM_19969	70	16	0	0
1227	Regulation and Cell signaling	Microbacterium_gubbeenense_DSM_15944	70	14	0	2
1228	Regulation and Cell signaling	Microbacterium_luticocti_DSM_19459	69	12	0	5
1229	Regulation and Cell signaling	Leucobacter_chironomi_DSM_19883	65	13	0	8
1230	Regulation and Cell signaling	Agrococcus_lahaulensis_DSM_17612	68	15	0	3
1231	Regulation and Cell signaling	Gulosibacter_molinativorax_DSM_13485	72	13	1	0
1232	Regulation and Cell signaling	1	58	28	0	0
1233	Regulation and Cell signaling	2	55	26	2	3
1234	Regulation and Cell signaling	3	44	28	1	13
1235	Regulation and Cell signaling	4	56	22	0	8
1236	Regulation and Cell signaling	5	49	28	2	7
1237	Regulation and Cell signaling	6	45	35	0	6
1238	Regulation and Cell signaling	7	41	39	2	4
1239	Regulation and Cell signaling	8	48	28	1	9
1240	Regulation and Cell signaling	9	47	28	2	9
1241	Regulation and Cell signaling	10	42	36	1	7
1242	Regulation and Cell signaling	11	42	41	2	1
1243	Regulation and Cell signaling	12	44	40	2	0
1244	Regulation and Cell signaling	13	46	28	0	12
1245	Regulation and Cell signaling	14	43	31	9	3
1246	Regulation and Cell signaling	15	70	14	0	2
1247	Regulation and Cell signaling	16	66	16	0	4
1248	Regulation and Cell signaling	17	65	15	1	5
1249	Regulation and Cell signaling	18	63	20	0	3
1250	Regulation and Cell signaling	19	52	23	0	11
1251	Regulation and Cell signaling	20	49	27	7	3
1252	Regulation and Cell signaling	21	56	30	0	0
1253	Regulation and Cell signaling	22	54	15	2	15
1254	Regulation and Cell signaling	23	54	24	6	2
1255	Regulation and Cell signaling	24	58	24	2	2
1256	Regulation and Cell signaling	25	66	13	3	4
1257	Regulation and Cell signaling	26	60	17	0	9
1258	Regulation and Cell signaling	27	59	20	6	1
1259	Regulation and Cell signaling	28	64	17	4	1
1260	Regulation and Cell signaling	29	68	13	5	0
1261	Respiration	Cryobacterium_flavum_CGMCC_1	103	47	0	3
1262	Respiration	Cryobacterium_sp_N19	102	50	0	1
1263	Respiration	Cryobacterium_sp_N21	102	47	0	4
1264	Respiration	Cryobacterium_luteum_CGMCC_1	101	44	0	8
1265	Respiration	Cryobacterium_sp_Y29	96	42	0	15
1266	Respiration	Cryobacterium_sp_M15	96	54	0	3
1267	Respiration	Cryobacterium_sp_Y57	93	48	0	12
1268	Respiration	Cryobacterium_sp_Y82	91	46	0	16
1269	Respiration	Cryobacterium_levicorallinum_CGMCC_1	92	47	0	14
1270	Respiration	Cryobacterium_sp_M91	92	57	0	4
1271	Respiration	Cryobacterium_sp_Y62	97	54	0	2
1272	Respiration	Cryobacterium_sp_Y50	97	55	0	1
1273	Respiration	Cryobacterium_sp_Y11	88	47	0	18
1274	Respiration	Cryobacterium_sp_MLB-32	103	44	0	6
1275	Respiration	Cryobacterium_roopkundense_RuG17	103	44	0	6
1276	Respiration	Cryobacterium_sp_M96	111	39	1	2
1277	Respiration	Cryobacterium_sp_M23	112	40	0	1
1278	Respiration	Cryobacterium_sp_M25	112	41	0	0
1279	Respiration	Cryobacterium_sp_N22	115	31	0	7
1280	Respiration	Cryobacterium_arcticum_PAMC_27867	115	38	0	0
1281	Respiration	Cryobacterium_psychrotolerans_CGMCC_1	108	26	0	19
1282	Respiration	Cryobacterium_mesophilum_CGMCC_1	112	22	1	18
1283	Respiration	Agromyces_italicus_DSM_16388	123	27	0	3
1284	Respiration	Agromyces_subbeticus_DSM_16689	123	28	0	2
1285	Respiration	Humibacter_albus_DSM_18994	107	31	0	15
1286	Respiration	Microbacterium_indicum_DSM_19969	117	28	0	8
1287	Respiration	Microbacterium_gubbeenense_DSM_15944	116	33	1	3
1288	Respiration	Microbacterium_luticocti_DSM_19459	110	31	1	11
1289	Respiration	Leucobacter_chironomi_DSM_19883	114	24	3	12
1290	Respiration	Agrococcus_lahaulensis_DSM_17612	124	24	1	4
1291	Respiration	Gulosibacter_molinativorax_DSM_13485	130	23	0	0
1292	Respiration	1	102	50	1	0
1293	Respiration	2	100	49	1	3
1294	Respiration	3	84	51	1	17
1295	Respiration	4	93	57	0	3
1296	Respiration	5	90	59	1	3
1297	Respiration	6	85	62	0	6
1298	Respiration	7	82	68	0	3
1299	Respiration	8	86	60	1	6
1300	Respiration	9	83	52	4	14
1301	Respiration	10	76	60	6	11
1302	Respiration	11	82	65	6	0
1303	Respiration	12	85	58	7	3
1304	Respiration	13	91	49	1	12
1305	Respiration	14	92	53	8	0
1306	Respiration	15	112	41	0	0
1307	Respiration	16	106	40	1	6
1308	Respiration	17	106	37	1	9
1309	Respiration	18	107	45	1	0
1310	Respiration	19	100	45	0	8
1311	Respiration	20	99	39	14	1
1312	Respiration	21	110	39	1	3
1313	Respiration	22	111	30	0	12
1314	Respiration	23	106	41	1	5
1315	Respiration	24	104	42	4	3
1316	Respiration	25	110	35	1	7
1317	Respiration	26	104	38	4	7
1318	Respiration	27	108	36	9	0
1319	Respiration	28	117	28	8	0
1320	Respiration	29	125	23	5	0
1321	RNA Metabolism	Cryobacterium_flavum_CGMCC_1	113	54	0	0
1322	RNA Metabolism	Cryobacterium_sp_N19	113	54	0	0
1323	RNA Metabolism	Cryobacterium_sp_N21	113	54	0	0
1324	RNA Metabolism	Cryobacterium_luteum_CGMCC_1	115	51	0	1
1325	RNA Metabolism	Cryobacterium_sp_Y29	108	54	0	5
1326	RNA Metabolism	Cryobacterium_sp_M15	108	57	0	2
1327	RNA Metabolism	Cryobacterium_sp_Y57	107	57	0	3
1328	RNA Metabolism	Cryobacterium_sp_Y82	111	51	0	5
1329	RNA Metabolism	Cryobacterium_levicorallinum_CGMCC_1	115	51	0	1
1330	RNA Metabolism	Cryobacterium_sp_M91	115	52	0	0
1331	RNA Metabolism	Cryobacterium_sp_Y62	112	54	0	1
1332	RNA Metabolism	Cryobacterium_sp_Y50	112	55	0	0
1333	RNA Metabolism	Cryobacterium_sp_Y11	108	53	0	6
1334	RNA Metabolism	Cryobacterium_sp_MLB-32	113	51	0	3
1335	RNA Metabolism	Cryobacterium_roopkundense_RuG17	113	53	0	1
1336	RNA Metabolism	Cryobacterium_sp_M96	110	54	0	3
1337	RNA Metabolism	Cryobacterium_sp_M23	110	57	0	0
1338	RNA Metabolism	Cryobacterium_sp_M25	110	56	0	1
1339	RNA Metabolism	Cryobacterium_sp_N22	112	54	0	1
1340	RNA Metabolism	Cryobacterium_arcticum_PAMC_27867	112	54	0	1
1341	RNA Metabolism	Cryobacterium_psychrotolerans_CGMCC_1	108	50	0	9
1342	RNA Metabolism	Cryobacterium_mesophilum_CGMCC_1	110	42	0	15
1343	RNA Metabolism	Agromyces_italicus_DSM_16388	108	52	0	7
1344	RNA Metabolism	Agromyces_subbeticus_DSM_16689	108	58	0	1
1345	RNA Metabolism	Humibacter_albus_DSM_18994	103	51	0	13
1346	RNA Metabolism	Microbacterium_indicum_DSM_19969	108	53	1	5
1347	RNA Metabolism	Microbacterium_gubbeenense_DSM_15944	109	55	0	3
1348	RNA Metabolism	Microbacterium_luticocti_DSM_19459	104	51	1	11
1349	RNA Metabolism	Leucobacter_chironomi_DSM_19883	114	44	2	7
1350	RNA Metabolism	Agrococcus_lahaulensis_DSM_17612	120	41	0	6
1351	RNA Metabolism	Gulosibacter_molinativorax_DSM_13485	127	40	0	0
1352	RNA Metabolism	1	113	54	0	0
1353	RNA Metabolism	2	113	52	2	0
1354	RNA Metabolism	3	111	52	0	4
1355	RNA Metabolism	4	107	59	0	1
1356	RNA Metabolism	5	107	56	4	0
1357	RNA Metabolism	6	110	55	1	1
1358	RNA Metabolism	7	109	56	0	2
1359	RNA Metabolism	8	111	51	1	4
1360	RNA Metabolism	9	110	53	2	2
1361	RNA Metabolism	10	109	55	0	3
1362	RNA Metabolism	11	108	58	0	1
1363	RNA Metabolism	12	107	56	3	1
1364	RNA Metabolism	13	109	53	1	4
1365	RNA Metabolism	14	107	56	1	3
1366	RNA Metabolism	15	110	57	0	0
1367	RNA Metabolism	16	106	53	4	4
1368	RNA Metabolism	17	109	54	1	3
1369	RNA Metabolism	18	108	57	0	2
1370	RNA Metabolism	19	108	59	0	0
1371	RNA Metabolism	20	105	54	5	3
1372	RNA Metabolism	21	102	57	0	8
1373	RNA Metabolism	22	100	57	2	8
1374	RNA Metabolism	23	102	64	1	0
1375	RNA Metabolism	24	102	59	5	1
1376	RNA Metabolism	25	104	57	1	5
1377	RNA Metabolism	26	101	56	6	4
1378	RNA Metabolism	27	107	51	9	0
1379	RNA Metabolism	28	116	47	4	0
1380	RNA Metabolism	29	120	40	7	0
1381	Secondary Metabolism	Cryobacterium_flavum_CGMCC_1	15	4	0	0
1382	Secondary Metabolism	Cryobacterium_sp_N19	15	4	0	0
1383	Secondary Metabolism	Cryobacterium_sp_N21	15	4	0	0
1384	Secondary Metabolism	Cryobacterium_luteum_CGMCC_1	13	5	1	0
1385	Secondary Metabolism	Cryobacterium_sp_Y29	16	2	1	0
1386	Secondary Metabolism	Cryobacterium_sp_M15	17	2	0	0
1387	Secondary Metabolism	Cryobacterium_sp_Y57	17	1	0	1
1388	Secondary Metabolism	Cryobacterium_sp_Y82	16	3	0	0
1389	Secondary Metabolism	Cryobacterium_levicorallinum_CGMCC_1	17	2	0	0
1390	Secondary Metabolism	Cryobacterium_sp_M91	17	2	0	0
1391	Secondary Metabolism	Cryobacterium_sp_Y62	16	3	0	0
1392	Secondary Metabolism	Cryobacterium_sp_Y50	16	3	0	0
1393	Secondary Metabolism	Cryobacterium_sp_Y11	14	2	0	3
1394	Secondary Metabolism	Cryobacterium_sp_MLB-32	14	5	0	0
1395	Secondary Metabolism	Cryobacterium_roopkundense_RuG17	14	4	0	1
1396	Secondary Metabolism	Cryobacterium_sp_M96	16	3	0	0
1397	Secondary Metabolism	Cryobacterium_sp_M23	15	4	0	0
1398	Secondary Metabolism	Cryobacterium_sp_M25	15	4	0	0
1399	Secondary Metabolism	Cryobacterium_sp_N22	14	4	0	1
1400	Secondary Metabolism	Cryobacterium_arcticum_PAMC_27867	14	5	0	0
1401	Secondary Metabolism	Cryobacterium_psychrotolerans_CGMCC_1	14	2	0	3
1402	Secondary Metabolism	Cryobacterium_mesophilum_CGMCC_1	17	2	0	0
1403	Secondary Metabolism	Agromyces_italicus_DSM_16388	16	3	0	0
1404	Secondary Metabolism	Agromyces_subbeticus_DSM_16689	16	2	0	1
1405	Secondary Metabolism	Humibacter_albus_DSM_18994	16	0	1	2
1406	Secondary Metabolism	Microbacterium_indicum_DSM_19969	18	0	0	1
1407	Secondary Metabolism	Microbacterium_gubbeenense_DSM_15944	18	1	0	0
1408	Secondary Metabolism	Microbacterium_luticocti_DSM_19459	18	0	0	1
1409	Secondary Metabolism	Leucobacter_chironomi_DSM_19883	16	2	0	1
1410	Secondary Metabolism	Agrococcus_lahaulensis_DSM_17612	18	0	0	1
1411	Secondary Metabolism	Gulosibacter_molinativorax_DSM_13485	18	1	0	0
1412	Secondary Metabolism	1	15	4	0	0
1413	Secondary Metabolism	2	14	4	0	1
1414	Secondary Metabolism	3	14	5	0	0
1415	Secondary Metabolism	4	17	2	0	0
1416	Secondary Metabolism	5	16	2	0	1
1417	Secondary Metabolism	6	14	3	0	2
1418	Secondary Metabolism	7	14	5	0	0
1419	Secondary Metabolism	8	16	2	0	1
1420	Secondary Metabolism	9	15	2	1	1
1421	Secondary Metabolism	10	14	3	0	2
1422	Secondary Metabolism	11	14	5	0	0
1423	Secondary Metabolism	12	13	4	1	1
1424	Secondary Metabolism	13	14	5	0	0
1425	Secondary Metabolism	14	14	5	0	0
1426	Secondary Metabolism	15	15	3	1	0
1427	Secondary Metabolism	16	14	3	0	2
1428	Secondary Metabolism	17	14	5	0	0
1429	Secondary Metabolism	18	14	5	0	0
1430	Secondary Metabolism	19	14	5	0	0
1431	Secondary Metabolism	20	14	2	3	0
1432	Secondary Metabolism	21	15	1	1	2
1433	Secondary Metabolism	22	16	3	0	0
1434	Secondary Metabolism	23	16	2	1	0
1435	Secondary Metabolism	24	16	2	0	1
1436	Secondary Metabolism	25	18	1	0	0
1437	Secondary Metabolism	26	16	1	0	2
1438	Secondary Metabolism	27	16	3	0	0
1439	Secondary Metabolism	28	16	1	2	0
1440	Secondary Metabolism	29	18	1	0	0
1441	Stress Response	Cryobacterium_flavum_CGMCC_1	96	42	0	1
1442	Stress Response	Cryobacterium_sp_N19	98	41	0	0
1443	Stress Response	Cryobacterium_sp_N21	98	41	0	0
1444	Stress Response	Cryobacterium_luteum_CGMCC_1	89	43	1	6
1445	Stress Response	Cryobacterium_sp_Y29	96	39	0	4
1446	Stress Response	Cryobacterium_sp_M15	96	39	0	4
1447	Stress Response	Cryobacterium_sp_Y57	94	39	0	6
1448	Stress Response	Cryobacterium_sp_Y82	92	39	0	8
1449	Stress Response	Cryobacterium_levicorallinum_CGMCC_1	93	43	0	3
1450	Stress Response	Cryobacterium_sp_M91	93	43	0	3
1451	Stress Response	Cryobacterium_sp_Y62	99	39	0	1
1452	Stress Response	Cryobacterium_sp_Y50	99	40	0	0
1453	Stress Response	Cryobacterium_sp_Y11	84	37	0	18
1454	Stress Response	Cryobacterium_sp_MLB-32	80	49	1	9
1455	Stress Response	Cryobacterium_roopkundense_RuG17	81	57	0	1
1456	Stress Response	Cryobacterium_sp_M96	92	46	0	1
1457	Stress Response	Cryobacterium_sp_M23	93	45	0	1
1458	Stress Response	Cryobacterium_sp_M25	93	45	0	1
1459	Stress Response	Cryobacterium_sp_N22	83	48	1	7
1460	Stress Response	Cryobacterium_arcticum_PAMC_27867	84	50	0	5
1461	Stress Response	Cryobacterium_psychrotolerans_CGMCC_1	81	43	0	15
1462	Stress Response	Cryobacterium_mesophilum_CGMCC_1	88	21	0	30
1463	Stress Response	Agromyces_italicus_DSM_16388	103	34	0	2
1464	Stress Response	Agromyces_subbeticus_DSM_16689	103	34	0	2
1465	Stress Response	Humibacter_albus_DSM_18994	88	33	0	18
1466	Stress Response	Microbacterium_indicum_DSM_19969	104	28	1	6
1467	Stress Response	Microbacterium_gubbeenense_DSM_15944	105	22	0	12
1468	Stress Response	Microbacterium_luticocti_DSM_19459	100	21	0	18
1469	Stress Response	Leucobacter_chironomi_DSM_19883	104	27	0	8
1470	Stress Response	Agrococcus_lahaulensis_DSM_17612	109	19	0	11
1471	Stress Response	Gulosibacter_molinativorax_DSM_13485	110	28	1	0
1472	Stress Response	1	96	41	0	2
1473	Stress Response	2	89	42	1	7
1474	Stress Response	3	86	49	0	4
1475	Stress Response	4	94	43	0	2
1476	Stress Response	5	90	43	2	4
1477	Stress Response	6	85	46	1	7
1478	Stress Response	7	83	52	1	3
1479	Stress Response	8	90	44	2	3
1480	Stress Response	9	91	39	1	8
1481	Stress Response	10	82	45	2	10
1482	Stress Response	11	84	55	0	0
1483	Stress Response	12	77	54	1	7
1484	Stress Response	13	75	55	3	6
1485	Stress Response	14	68	57	4	10
1486	Stress Response	15	92	46	0	1
1487	Stress Response	16	79	45	2	13
1488	Stress Response	17	80	54	1	4
1489	Stress Response	18	77	54	4	4
1490	Stress Response	19	72	58	0	9
1491	Stress Response	20	71	50	17	1
1492	Stress Response	21	86	50	1	2
1493	Stress Response	22	83	32	4	20
1494	Stress Response	23	84	48	4	3
1495	Stress Response	24	86	48	3	2
1496	Stress Response	25	100	34	0	5
1497	Stress Response	26	89	39	0	11
1498	Stress Response	27	89	35	15	0
1499	Stress Response	28	103	29	6	1
1500	Stress Response	29	109	28	2	0
1501	Sulfur Metabolism	Cryobacterium_flavum_CGMCC_1	26	4	0	1
1502	Sulfur Metabolism	Cryobacterium_sp_N19	26	4	0	1
1503	Sulfur Metabolism	Cryobacterium_sp_N21	26	4	0	1
1504	Sulfur Metabolism	Cryobacterium_luteum_CGMCC_1	27	2	0	2
1505	Sulfur Metabolism	Cryobacterium_sp_Y29	27	1	0	3
1506	Sulfur Metabolism	Cryobacterium_sp_M15	27	4	0	0
1507	Sulfur Metabolism	Cryobacterium_sp_Y57	24	4	0	3
1508	Sulfur Metabolism	Cryobacterium_sp_Y82	24	3	0	4
1509	Sulfur Metabolism	Cryobacterium_levicorallinum_CGMCC_1	25	4	0	2
1510	Sulfur Metabolism	Cryobacterium_sp_M91	25	6	0	0
1511	Sulfur Metabolism	Cryobacterium_sp_Y62	25	6	0	0
1512	Sulfur Metabolism	Cryobacterium_sp_Y50	25	6	0	0
1513	Sulfur Metabolism	Cryobacterium_sp_Y11	17	6	0	8
1514	Sulfur Metabolism	Cryobacterium_sp_MLB-32	21	3	0	7
1515	Sulfur Metabolism	Cryobacterium_roopkundense_RuG17	21	10	0	0
1516	Sulfur Metabolism	Cryobacterium_sp_M96	23	8	0	0
1517	Sulfur Metabolism	Cryobacterium_sp_M23	24	7	0	0
1518	Sulfur Metabolism	Cryobacterium_sp_M25	24	7	0	0
1519	Sulfur Metabolism	Cryobacterium_sp_N22	14	9	1	7
1520	Sulfur Metabolism	Cryobacterium_arcticum_PAMC_27867	15	15	0	1
1521	Sulfur Metabolism	Cryobacterium_psychrotolerans_CGMCC_1	15	3	0	13
1522	Sulfur Metabolism	Cryobacterium_mesophilum_CGMCC_1	13	3	0	15
1523	Sulfur Metabolism	Agromyces_italicus_DSM_16388	17	7	0	7
1524	Sulfur Metabolism	Agromyces_subbeticus_DSM_16689	17	12	0	2
1525	Sulfur Metabolism	Humibacter_albus_DSM_18994	16	6	0	9
1526	Sulfur Metabolism	Microbacterium_indicum_DSM_19969	18	11	0	2
1527	Sulfur Metabolism	Microbacterium_gubbeenense_DSM_15944	18	11	0	2
1528	Sulfur Metabolism	Microbacterium_luticocti_DSM_19459	20	3	0	8
1529	Sulfur Metabolism	Leucobacter_chironomi_DSM_19883	23	1	0	7
1530	Sulfur Metabolism	Agrococcus_lahaulensis_DSM_17612	23	3	0	5
1531	Sulfur Metabolism	Gulosibacter_molinativorax_DSM_13485	25	6	0	0
1532	Sulfur Metabolism	1	26	5	0	0
1533	Sulfur Metabolism	2	26	4	1	0
1534	Sulfur Metabolism	3	22	3	1	5
1535	Sulfur Metabolism	4	24	4	0	3
1536	Sulfur Metabolism	5	24	7	0	0
1537	Sulfur Metabolism	6	23	7	0	1
1538	Sulfur Metabolism	7	21	8	0	2
1539	Sulfur Metabolism	8	23	6	0	2
1540	Sulfur Metabolism	9	23	6	0	2
1541	Sulfur Metabolism	10	21	8	0	2
1542	Sulfur Metabolism	11	17	10	0	4
1543	Sulfur Metabolism	12	17	14	0	0
1544	Sulfur Metabolism	13	17	10	0	4
1545	Sulfur Metabolism	14	11	12	2	6
1546	Sulfur Metabolism	15	23	7	0	1
1547	Sulfur Metabolism	16	15	8	0	8
1548	Sulfur Metabolism	17	15	16	0	0
1549	Sulfur Metabolism	18	15	16	0	0
1550	Sulfur Metabolism	19	13	16	0	2
1551	Sulfur Metabolism	20	13	18	0	0
1552	Sulfur Metabolism	21	12	17	1	1
1553	Sulfur Metabolism	22	12	13	1	5
1554	Sulfur Metabolism	23	13	15	3	0
1555	Sulfur Metabolism	24	16	12	3	0
1556	Sulfur Metabolism	25	17	10	3	1
1557	Sulfur Metabolism	26	19	11	0	1
1558	Sulfur Metabolism	27	19	8	4	0
1559	Sulfur Metabolism	28	23	8	0	0
1560	Sulfur Metabolism	29	23	6	2	0
1561	unavailable	Cryobacterium_flavum_CGMCC_1	5069	1925	1	264
1562	unavailable	Cryobacterium_sp_N19	5100	2015	0	144
1563	unavailable	Cryobacterium_sp_N21	5100	1957	0	202
1564	unavailable	Cryobacterium_luteum_CGMCC_1	4917	1651	8	683
1565	unavailable	Cryobacterium_sp_Y29	5354	1632	6	267
1566	unavailable	Cryobacterium_sp_M15	5356	1617	4	282
1567	unavailable	Cryobacterium_sp_Y57	5095	1750	8	406
1568	unavailable	Cryobacterium_sp_Y82	4928	1618	1	712
1569	unavailable	Cryobacterium_levicorallinum_CGMCC_1	5281	1738	0	240
1570	unavailable	Cryobacterium_sp_M91	5277	1818	4	160
1571	unavailable	Cryobacterium_sp_Y62	5088	1980	1	190
1572	unavailable	Cryobacterium_sp_Y50	5084	2017	5	153
1573	unavailable	Cryobacterium_sp_Y11	4421	1666	5	1167
1574	unavailable	Cryobacterium_sp_MLB-32	5053	1734	19	453
1575	unavailable	Cryobacterium_roopkundense_RuG17	5067	1858	5	329
1576	unavailable	Cryobacterium_sp_M96	5553	1487	0	219
1577	unavailable	Cryobacterium_sp_M23	5530	1627	0	102
1578	unavailable	Cryobacterium_sp_M25	5527	1558	3	171
1579	unavailable	Cryobacterium_sp_N22	5195	1721	6	337
1580	unavailable	Cryobacterium_arcticum_PAMC_27867	5185	1825	16	233
1581	unavailable	Cryobacterium_psychrotolerans_CGMCC_1	4793	1245	10	1211
1582	unavailable	Cryobacterium_mesophilum_CGMCC_1	5186	777	10	1286
1583	unavailable	Agromyces_italicus_DSM_16388	5461	1449	6	343
1584	unavailable	Agromyces_subbeticus_DSM_16689	5459	1566	8	226
1585	unavailable	Humibacter_albus_DSM_18994	5342	945	25	947
1586	unavailable	Microbacterium_indicum_DSM_19969	6132	861	4	262
1587	unavailable	Microbacterium_gubbeenense_DSM_15944	6115	927	21	196
1588	unavailable	Microbacterium_luticocti_DSM_19459	5919	845	14	481
1589	unavailable	Leucobacter_chironomi_DSM_19883	6006	676	16	561
1590	unavailable	Agrococcus_lahaulensis_DSM_17612	6222	692	15	330
1591	unavailable	Gulosibacter_molinativorax_DSM_13485	6574	653	32	0
1592	unavailable	1	5021	2110	49	79
1593	unavailable	2	4773	2037	152	297
1594	unavailable	3	4331	2291	43	594
1595	unavailable	4	5087	1883	16	273
1596	unavailable	5	4859	2086	70	244
1597	unavailable	6	4339	2295	35	590
1598	unavailable	7	4109	2782	103	265
1599	unavailable	8	4802	1852	126	479
1600	unavailable	9	4697	1939	231	392
1601	unavailable	10	4153	2272	59	775
1602	unavailable	11	4149	2770	277	63
1603	unavailable	12	4198	2536	297	228
1604	unavailable	13	4363	2055	132	709
1605	unavailable	14	4131	2381	383	364
1606	unavailable	15	5466	1642	87	64
1607	unavailable	16	4757	1485	221	796
1608	unavailable	17	4762	1842	216	439
1609	unavailable	18	4766	2244	37	212
1610	unavailable	19	4446	2388	68	357
1611	unavailable	20	4426	1975	770	88
1612	unavailable	21	4988	1977	86	208
1613	unavailable	22	4790	1508	284	677
1614	unavailable	23	5006	1824	361	68
1615	unavailable	24	5277	1654	238	90
1616	unavailable	25	5787	977	146	349
1617	unavailable	26	5460	1271	55	473
1618	unavailable	27	5477	1199	545	38
1619	unavailable	28	6011	1011	226	11
1620	unavailable	29	6237	653	369	0
1621	Virulence, Disease and Defense	Cryobacterium_flavum_CGMCC_1	132	61	0	4
1622	Virulence, Disease and Defense	Cryobacterium_sp_N19	133	57	0	7
1623	Virulence, Disease and Defense	Cryobacterium_sp_N21	133	64	0	0
1624	Virulence, Disease and Defense	Cryobacterium_luteum_CGMCC_1	132	59	0	6
1625	Virulence, Disease and Defense	Cryobacterium_sp_Y29	132	54	0	11
1626	Virulence, Disease and Defense	Cryobacterium_sp_M15	132	58	0	7
1627	Virulence, Disease and Defense	Cryobacterium_sp_Y57	128	56	0	13
1628	Virulence, Disease and Defense	Cryobacterium_sp_Y82	128	52	0	17
1629	Virulence, Disease and Defense	Cryobacterium_levicorallinum_CGMCC_1	135	51	0	11
1630	Virulence, Disease and Defense	Cryobacterium_sp_M91	135	59	0	3
1631	Virulence, Disease and Defense	Cryobacterium_sp_Y62	137	57	0	3
1632	Virulence, Disease and Defense	Cryobacterium_sp_Y50	137	58	0	2
1633	Virulence, Disease and Defense	Cryobacterium_sp_Y11	119	58	0	20
1634	Virulence, Disease and Defense	Cryobacterium_sp_MLB-32	133	57	0	7
1635	Virulence, Disease and Defense	Cryobacterium_roopkundense_RuG17	133	52	0	12
1636	Virulence, Disease and Defense	Cryobacterium_sp_M96	141	53	0	3
1637	Virulence, Disease and Defense	Cryobacterium_sp_M23	139	58	0	0
1638	Virulence, Disease and Defense	Cryobacterium_sp_M25	139	56	0	2
1639	Virulence, Disease and Defense	Cryobacterium_sp_N22	133	51	0	13
1640	Virulence, Disease and Defense	Cryobacterium_arcticum_PAMC_27867	132	57	1	7
1641	Virulence, Disease and Defense	Cryobacterium_psychrotolerans_CGMCC_1	117	45	0	35
1642	Virulence, Disease and Defense	Cryobacterium_mesophilum_CGMCC_1	117	35	0	45
1643	Virulence, Disease and Defense	Agromyces_italicus_DSM_16388	138	49	0	10
1644	Virulence, Disease and Defense	Agromyces_subbeticus_DSM_16689	138	50	0	9
1645	Virulence, Disease and Defense	Humibacter_albus_DSM_18994	123	37	0	37
1646	Virulence, Disease and Defense	Microbacterium_indicum_DSM_19969	145	40	0	12
1647	Virulence, Disease and Defense	Microbacterium_gubbeenense_DSM_15944	145	47	0	5
1648	Virulence, Disease and Defense	Microbacterium_luticocti_DSM_19459	136	47	0	14
1649	Virulence, Disease and Defense	Leucobacter_chironomi_DSM_19883	131	40	0	26
1650	Virulence, Disease and Defense	Agrococcus_lahaulensis_DSM_17612	137	44	0	16
1651	Virulence, Disease and Defense	Gulosibacter_molinativorax_DSM_13485	148	49	0	0
1652	Virulence, Disease and Defense	1	132	64	0	1
1653	Virulence, Disease and Defense	2	126	59	6	6
1654	Virulence, Disease and Defense	3	119	63	2	13
1655	Virulence, Disease and Defense	4	127	64	1	5
1656	Virulence, Disease and Defense	5	123	64	5	5
1657	Virulence, Disease and Defense	6	119	67	2	9
1658	Virulence, Disease and Defense	7	110	74	2	11
1659	Virulence, Disease and Defense	8	121	58	4	14
1660	Virulence, Disease and Defense	9	124	59	1	13
1661	Virulence, Disease and Defense	10	111	71	1	14
1662	Virulence, Disease and Defense	11	110	76	9	2
1663	Virulence, Disease and Defense	12	112	75	3	7
1664	Virulence, Disease and Defense	13	113	62	2	20
1665	Virulence, Disease and Defense	14	98	77	5	17
1666	Virulence, Disease and Defense	15	138	55	3	1
1667	Virulence, Disease and Defense	16	121	55	1	20
1668	Virulence, Disease and Defense	17	118	60	4	15
1669	Virulence, Disease and Defense	18	117	75	0	5
1670	Virulence, Disease and Defense	19	103	80	0	14
1671	Virulence, Disease and Defense	20	102	79	15	1
1672	Virulence, Disease and Defense	21	113	79	1	4
1673	Virulence, Disease and Defense	22	111	56	3	27
1674	Virulence, Disease and Defense	23	113	73	10	1
1675	Virulence, Disease and Defense	24	116	70	4	7
1676	Virulence, Disease and Defense	25	132	48	4	13
1677	Virulence, Disease and Defense	26	118	59	2	18
1678	Virulence, Disease and Defense	27	120	66	11	0
1679	Virulence, Disease and Defense	28	130	59	7	1
1680	Virulence, Disease and Defense	29	137	49	11	0
