# Supplementary material for: Genomic Insights of Cryobacterium Isolated From Ice Core Reveal Genome Dynamics for Adaptation in Glacier
Source: Front Microbiol. 2020 Jul 14;11:1530. doi: 10.3389/fmicb.2020.01530 (PMC7381226; doi:10.3389/fmicb.2020.01530)
Supplement: Supplementary file 7 [file Table_6.xlsx]

## Sheet: Fig. 4A carbohydrates
Table S6 Name of the specific genes
Gene name	Function description	Humibacter_albus_DSM_18994	Cryobacterium_sp_M91	Microbacterium_luticocti_DSM_19459	Cryobacterium_sp_Y50	Rubrobacter_xylanophilus_DSM9941	Cryobacterium_sp_Y11	Agrococcus_lahaulensis_DSM_17612	Cryobacterium_levicorallinum_CGMCC_111211	Microbacterium_gubbeenense_DSM_15944	Cryobacterium_sp_Y82	Gulosibacter_molinativorax_DSM_13485	Rubrobacter_radiotolerans_RSPS-4	Cryobacterium_luteum_CGMCC_111210	Cryobacterium_psychrotolerans_CGMCC_15382	Cryobacterium_sp_N21	Cryobacterium_sp_Y57	Pseudoclavibacter_soli_DSM_23366	Agromyces_italicus_DSM_16388	Cryobacterium_sp_M23	Cryobacterium_mesophilum_CGMCC_110440	Cryobacterium_sp_M25	Cryobacterium_sp_MLB-32	Cryobacterium_sp_Y62	Cryobacterium_sp_N19	Agromyces_subbeticus_DSM_16689	Cryobacterium_sp_Y29	Cryobacterium_arcticum_PAMC_27867	Cryobacterium_flavum_CGMCC_111215	Cryobacterium_sp_N22	Cryobacterium_roopkundense_RuG17	Leucobacter_chironomi_DSM_19883	Cryobacterium_sp_M96	Microbacterium_indicum_DSM_19969	Cryobacterium_sp_M15
2,3-butanediol dehydrogenase, R-alcohol forming, (R)- and (S)-acetoin-specific (EC 1.1.1.4)	Acetoin, butanediol metabolism	0	1	0	0	0	1	1	0	0	0	2	1	1	1	1	1	1	0	1	0	1	1	0	1	0	1	0	1	0	1	1	1	1	1
2,3-butanediol dehydrogenase, R-alcohol forming, (R)- and (S)-acetoin-specific (EC 1.1.1.4)	Acetoin, butanediol metabolism	0	2	0	2	0	3	0	2	0	0	0	0	3	1	3	2	0	0	1	0	1	1	1	3	0	2	0	4	0	1	0	1	0	1
2,3-butanediol dehydrogenase, R-alcohol forming, (R)- and (S)-acetoin-specific (EC 1.1.1.4)	Acetoin, butanediol metabolism	0	0	0	0	0	0	0	0	0	0	0	0	0	0	0	0	0	0	1	0	1	0	0	0	0	0	0	0	1	0	0	1	0	0
2,3-butanediol dehydrogenase, S-alcohol forming, (S)-acetoin-specific (EC 1.1.1.76)	Acetoin, butanediol metabolism	0	0	0	1	0	1	0	0	0	0	0	1	0	1	0	0	1	0	1	0	1	1	0	0	0	0	1	0	0	0	0	1	1	0
Acetoin catabolism protein X	Acetoin, butanediol metabolism	0	0	0	0	1	0	0	0	0	0	0	1	0	0	0	0	0	0	0	0	0	0	0	0	0	0	0	0	0	0	0	0	0	0
Electron transfer flavoprotein, alpha subunit	Acetyl-CoA fermentation to Butyrate	0	0	0	1	0	0	0	0	0	0	0	0	0	0	0	0	0	0	0	0	0	0	1	0	0	0	0	0	0	0	0	0	0	0
Electron transfer flavoprotein, alpha subunit	Acetyl-CoA fermentation to Butyrate	1	1	1	1	0	0	1	2	0	1	0	0	0	1	1	0	0	1	0	0	0	1	1	1	1	0	0	1	0	0	0	0	0	0
Electron transfer flavoprotein, alpha subunit	Acetyl-CoA fermentation to Butyrate	0	0	0	1	0	0	0	0	0	0	0	0	0	1	0	0	0	0	0	1	0	1	0	0	0	0	0	1	0	1	0	0	0	0
Electron transfer flavoprotein, alpha subunit	Acetyl-CoA fermentation to Butyrate	0	0	0	1	0	0	0	0	0	0	0	0	0	0	0	0	0	0	0	0	0	0	1	0	0	0	0	0	0	1	0	0	0	0
Electron transfer flavoprotein, beta subunit	Acetyl-CoA fermentation to Butyrate	0	0	0	1	0	0	0	0	0	0	0	0	0	0	0	0	0	0	0	0	0	0	1	0	0	0	0	0	0	0	0	0	0	0
Electron transfer flavoprotein, beta subunit	Acetyl-CoA fermentation to Butyrate	0	0	0	1	0	0	0	0	0	0	0	0	0	0	0	0	0	0	0	0	0	0	1	0	0	0	0	0	0	0	0	0	0	0
Electron transfer flavoprotein, beta subunit	Acetyl-CoA fermentation to Butyrate	0	0	0	1	0	0	0	0	0	0	0	0	0	0	0	0	0	0	0	0	0	0	1	0	0	0	0	0	0	0	0	0	0	0
Electron transfer flavoprotein, beta subunit	Acetyl-CoA fermentation to Butyrate	1	1	1	2	0	0	1	2	0	1	0	0	0	1	1	0	0	1	0	0	0	1	2	1	1	0	0	2	0	1	0	0	0	0
Electron transfer flavoprotein, beta subunit	Acetyl-CoA fermentation to Butyrate	0	0	0	1	0	0	0	0	0	0	0	0	0	1	0	0	0	0	0	1	0	1	0	0	0	0	0	0	0	1	0	0	0	0
Electron transfer flavoprotein, beta subunit	Acetyl-CoA fermentation to Butyrate	0	0	0	0	0	0	0	0	0	0	0	0	0	0	0	0	0	0	0	0	0	0	0	1	0	0	0	1	0	0	0	0	0	0
Acetolactate synthase, catabolic (EC 2.2.1.6)	Alpha-acetolactate operon	0	0	0	0	0	0	0	0	0	0	0	0	0	0	0	0	1	0	1	0	1	0	0	0	0	0	1	0	1	0	0	1	0	0
Alpha-acetolactate decarboxylase (EC 4.1.1.5)	Alpha-acetolactate operon	0	0	0	0	0	0	0	0	0	0	0	0	0	0	0	0	1	0	1	0	1	0	0	0	0	0	1	0	1	0	0	1	0	0
putative esterase	Alpha-Amylase locus in Streptocococcus	0	0	0	0	0	0	0	0	1	0	0	0	0	0	0	0	0	0	0	0	0	0	0	0	0	0	0	0	0	0	0	0	1	0
putative esterase	Alpha-Amylase locus in Streptocococcus	0	0	0	1	0	0	0	0	0	0	0	0	0	1	0	0	0	0	1	0	1	1	1	0	0	0	0	0	0	1	0	1	0	0
putative esterase	Alpha-Amylase locus in Streptocococcus	0	0	1	0	0	0	0	0	1	0	0	0	0	0	0	0	0	1	0	0	0	0	0	0	1	0	1	0	1	0	0	0	1	0
putative esterase	Alpha-Amylase locus in Streptocococcus	0	0	1	1	0	0	1	0	0	1	0	0	0	0	0	0	0	0	0	0	0	0	1	0	0	0	0	0	0	0	0	0	1	0
putative esterase	Alpha-Amylase locus in Streptocococcus	0	0	0	0	0	0	0	0	0	0	0	0	1	1	1	0	0	0	0	0	0	1	0	1	0	0	0	1	0	0	0	0	0	0
putative esterase	Alpha-Amylase locus in Streptocococcus	0	0	0	0	0	0	0	0	0	1	0	0	0	0	0	0	0	0	0	0	0	0	0	0	1	0	1	0	1	0	1	0	0	0
putative esterase	Alpha-Amylase locus in Streptocococcus	0	0	0	0	0	0	0	0	0	0	0	0	0	0	0	0	0	1	0	0	0	0	0	0	0	0	0	0	0	0	1	0	0	0
Pyruvate formate-lyase (EC 2.3.1.54)	Butanol Biosynthesis	0	1	0	1	0	0	0	1	0	1	0	0	1	1	1	0	0	0	1	0	1	1	1	1	0	0	1	1	1	0	0	1	0	0
Flagellar assembly factor FliW	Carbon storage regulator	0	1	0	1	0	1	0	1	0	1	0	0	1	1	1	1	0	0	1	0	1	1	1	1	0	1	1	1	1	1	0	1	0	1
Beta-hexosaminidase (EC 3.2.1.52)	Chitin and N-acetylglucosamine utilization	0	0	0	0	1	0	0	0	0	0	0	1	0	0	0	0	0	0	0	0	0	0	0	0	0	0	0	0	0	0	0	0	0	0
Beta-hexosaminidase (EC 3.2.1.52)	Chitin and N-acetylglucosamine utilization	0	0	1	0	0	0	0	0	1	0	0	0	1	0	0	0	0	1	2	0	2	0	0	0	1	0	0	0	0	0	0	1	0	0
Beta-hexosaminidase (EC 3.2.1.52)	Chitin and N-acetylglucosamine utilization	0	0	0	1	0	0	0	0	0	0	0	0	0	1	0	0	0	1	1	0	1	1	1	0	0	0	0	0	0	1	0	0	0	0
Beta-hexosaminidase (EC 3.2.1.52)	Chitin and N-acetylglucosamine utilization	1	0	0	0	0	0	0	0	0	0	0	0	0	0	0	0	0	1	0	0	0	0	0	0	1	0	1	0	1	0	0	0	0	0
Beta-hexosaminidase (EC 3.2.1.52)	Chitin and N-acetylglucosamine utilization	1	0	0	0	0	0	0	0	0	0	0	0	0	0	0	0	0	1	0	0	0	0	0	0	2	0	0	0	0	0	0	0	1	0
Beta-hexosaminidase (EC 3.2.1.52)	Chitin and N-acetylglucosamine utilization	0	0	0	0	0	0	0	0	0	0	0	0	0	0	0	0	0	1	0	2	0	0	0	0	1	0	0	0	0	0	0	0	0	0
Beta-hexosaminidase (EC 3.2.1.52)	Chitin and N-acetylglucosamine utilization	1	0	0	0	0	0	0	0	0	0	0	0	0	0	0	0	0	1	0	0	0	0	0	0	2	0	0	0	0	0	0	0	0	0
Beta-hexosaminidase (EC 3.2.1.52)	Chitin and N-acetylglucosamine utilization	0	0	0	0	0	0	0	0	0	0	0	0	0	0	0	0	0	1	0	0	0	0	0	0	1	0	0	0	0	0	0	0	0	0
Chitin binding protein	Chitin and N-acetylglucosamine utilization	0	1	0	1	0	0	0	1	0	0	0	0	0	0	0	0	0	0	0	0	0	0	1	0	0	0	0	0	0	0	0	0	0	0
Chitinase (EC 3.2.1.14)	Chitin and N-acetylglucosamine utilization	0	0	0	1	0	1	0	0	0	1	0	0	0	1	1	0	0	0	0	0	0	1	1	1	0	0	1	1	1	1	0	0	0	0
Chitinase (EC 3.2.1.14)	Chitin and N-acetylglucosamine utilization	0	3	0	3	0	3	0	3	0	3	0	0	2	1	3	3	0	0	0	0	0	1	3	3	0	3	0	3	0	0	0	0	0	3
Chitinase (EC 3.2.1.14)	Chitin and N-acetylglucosamine utilization	0	0	0	0	0	0	0	0	0	0	0	0	0	1	0	0	0	0	1	0	1	1	0	0	0	0	1	0	0	1	0	1	0	0
Chitinase (EC 3.2.1.14)	Chitin and N-acetylglucosamine utilization	0	0	0	0	0	0	0	0	0	0	0	0	1	0	1	0	0	0	0	0	0	0	0	1	0	0	0	1	0	0	0	0	0	0
Chitinase (EC 3.2.1.14)	Chitin and N-acetylglucosamine utilization	0	0	0	0	0	0	0	0	0	0	0	0	0	0	1	0	0	0	0	0	0	0	0	1	0	0	0	1	0	0	0	0	0	0
Chitinase (EC 3.2.1.14)	Chitin and N-acetylglucosamine utilization	0	0	0	0	0	0	0	0	0	0	0	0	0	1	0	0	0	0	0	0	0	1	0	0	0	0	0	0	0	1	0	0	0	0
Chitinase (EC 3.2.1.14)	Chitin and N-acetylglucosamine utilization	0	0	0	0	0	0	0	0	0	0	0	0	0	0	0	0	0	1	0	0	0	0	0	0	1	0	0	0	0	0	0	0	0	0
Chitinase (EC 3.2.1.14)	Chitin and N-acetylglucosamine utilization	0	0	0	0	0	0	0	0	0	0	0	0	0	0	0	0	0	1	0	0	0	0	0	0	1	0	0	0	0	0	0	0	0	0
Chitinase (EC 3.2.1.14)	Chitin and N-acetylglucosamine utilization	0	0	0	0	0	0	0	0	0	0	0	0	0	0	0	0	0	0	0	0	1	0	0	0	0	0	0	0	0	0	0	1	0	0
Glucosamine-6-phosphate deaminase (EC 3.5.99.6)	Sialic Acid Metabolism	0	0	0	0	0	0	0	1	0	0	0	0	0	0	0	0	0	0	0	1	0	0	0	0	0	0	0	0	0	0	0	0	0	0
Glucosamine-6-phosphate deaminase (EC 3.5.99.6)	Sialic Acid Metabolism	1	0	1	0	0	0	0	0	0	0	0	0	0	0	1	0	0	1	0	1	0	0	0	1	1	0	0	1	0	0	0	0	0	0
N-Acetyl-D-glucosamine ABC transport system, permease protein 1	Chitin and N-acetylglucosamine utilization	0	0	1	0	0	0	0	0	0	0	0	0	0	1	0	0	0	1	1	1	1	1	0	0	1	0	1	0	1	1	0	1	1	0
N-Acetyl-D-glucosamine ABC transport system, permease protein 1	Chitin and N-acetylglucosamine utilization	0	0	0	1	0	0	0	0	1	0	0	0	0	1	1	0	0	1	0	1	0	1	1	1	1	0	0	1	0	0	0	0	0	0
N-Acetyl-D-glucosamine ABC transport system, permease protein 1	Chitin and N-acetylglucosamine utilization	0	0	0	0	0	0	0	0	0	0	0	0	1	1	0	0	0	0	1	1	1	1	0	0	0	1	1	0	0	0	0	1	0	1
N-Acetyl-D-glucosamine ABC transport system, permease protein 1	Chitin and N-acetylglucosamine utilization	0	0	0	0	0	0	0	0	0	0	0	0	0	1	0	0	0	0	1	1	1	1	0	0	0	1	1	0	0	0	0	1	0	1
N-Acetyl-D-glucosamine ABC transport system, permease protein 1	Chitin and N-acetylglucosamine utilization	0	1	0	0	0	0	0	0	1	0	0	0	0	0	0	0	0	0	1	0	1	0	0	0	1	0	1	0	1	0	0	1	0	0
N-Acetyl-D-glucosamine ABC transport system, permease protein 1	Chitin and N-acetylglucosamine utilization	0	1	0	0	0	0	0	0	0	0	0	0	0	0	0	0	0	1	1	0	1	0	0	0	1	0	0	0	0	0	0	1	1	0
N-Acetyl-D-glucosamine ABC transport system, permease protein 1	Chitin and N-acetylglucosamine utilization	0	0	0	0	0	0	0	0	0	0	0	0	0	0	0	1	0	0	1	0	1	0	0	1	0	1	0	0	0	0	0	1	0	0
N-Acetyl-D-glucosamine ABC transport system, permease protein 1	Chitin and N-acetylglucosamine utilization	0	0	0	0	0	0	0	0	0	0	0	0	0	0	0	0	0	0	0	0	0	0	0	0	1	0	1	0	1	0	0	0	1	0
N-Acetyl-D-glucosamine ABC transport system, permease protein 1	Chitin and N-acetylglucosamine utilization	1	0	1	0	0	0	1	0	0	0	0	0	0	0	0	0	0	0	0	0	0	0	0	0	0	0	0	0	0	0	0	0	0	0
N-Acetyl-D-glucosamine ABC transport system, permease protein 1	Chitin and N-acetylglucosamine utilization	0	0	0	1	0	0	0	0	0	0	0	0	0	0	0	0	0	0	0	1	0	0	0	0	1	0	0	0	0	0	0	0	0	0
N-Acetyl-D-glucosamine ABC transport system, permease protein 1	Chitin and N-acetylglucosamine utilization	0	0	0	0	0	0	0	0	0	0	0	0	0	0	1	0	0	0	0	0	0	0	0	1	0	0	0	1	0	0	0	0	0	0
N-Acetyl-D-glucosamine ABC transport system, permease protein 1	Chitin and N-acetylglucosamine utilization	1	0	0	0	0	0	0	0	1	0	0	0	0	0	0	0	0	0	0	0	0	0	0	0	0	0	0	0	0	0	0	0	1	0
N-Acetyl-D-glucosamine ABC transport system, permease protein 1	Chitin and N-acetylglucosamine utilization	0	0	0	0	0	0	0	0	0	0	0	0	0	0	0	0	0	0	0	0	0	0	0	0	1	0	0	0	0	0	0	0	1	0
N-Acetyl-D-glucosamine ABC transport system, permease protein 1	Chitin and N-acetylglucosamine utilization	0	0	0	0	0	0	0	0	0	0	0	0	0	0	0	0	0	0	0	0	0	0	0	0	0	0	1	0	1	0	0	0	0	0
N-Acetyl-D-glucosamine ABC transport system, permease protein 1	Chitin and N-acetylglucosamine utilization	0	0	0	0	0	0	0	1	0	0	0	0	0	0	0	0	0	0	0	1	0	0	0	0	0	0	0	0	0	0	0	0	0	0
N-Acetyl-D-glucosamine ABC transport system, permease protein 1	Chitin and N-acetylglucosamine utilization	0	1	0	0	0	0	0	0	0	0	0	0	0	0	0	0	0	0	1	0	0	0	0	0	0	0	0	0	0	0	0	0	0	0
N-Acetyl-D-glucosamine ABC transport system, permease protein 2	Chitin and N-acetylglucosamine utilization	0	0	0	1	0	0	0	0	1	0	0	0	0	1	1	0	0	1	0	1	0	1	1	1	1	0	0	1	0	0	0	0	0	0
N-Acetyl-D-glucosamine ABC transport system, permease protein 2	Chitin and N-acetylglucosamine utilization	0	1	0	0	0	1	0	1	0	1	0	0	0	0	0	0	0	0	1	0	1	0	0	0	0	1	0	0	0	1	0	1	0	1
N-Acetyl-D-glucosamine ABC transport system, permease protein 2	Chitin and N-acetylglucosamine utilization	0	1	0	0	0	0	0	0	0	0	0	0	0	0	0	0	0	1	1	0	1	0	0	0	1	0	0	0	0	0	0	1	1	0
N-Acetyl-D-glucosamine ABC transport system, permease protein 2	Chitin and N-acetylglucosamine utilization	0	0	1	0	0	0	0	0	0	0	0	0	0	0	1	0	0	1	0	0	0	0	0	1	1	0	0	1	0	0	0	0	0	0
N-Acetyl-D-glucosamine ABC transport system, permease protein 2	Chitin and N-acetylglucosamine utilization	0	0	0	0	0	0	0	0	0	0	0	0	0	0	0	1	0	0	1	0	1	0	0	1	0	1	0	0	0	0	0	1	0	0
N-Acetyl-D-glucosamine ABC transport system, permease protein 2	Chitin and N-acetylglucosamine utilization	0	0	0	1	0	0	0	0	0	0	0	0	0	0	0	0	0	0	0	1	0	0	0	0	1	0	0	0	0	0	0	0	0	0
N-Acetyl-D-glucosamine ABC transport system, permease protein 2	Chitin and N-acetylglucosamine utilization	0	0	0	0	0	0	0	0	0	0	0	0	0	0	1	0	0	0	0	0	0	0	0	1	0	0	0	1	0	0	0	0	0	0
N-Acetyl-D-glucosamine ABC transport system, permease protein 2	Chitin and N-acetylglucosamine utilization	1	0	0	0	0	0	0	0	1	0	0	0	0	0	0	0	0	0	0	0	0	0	0	0	0	0	0	0	0	0	0	0	1	0
N-Acetyl-D-glucosamine ABC transport system, permease protein 2	Chitin and N-acetylglucosamine utilization	0	0	0	0	0	0	0	0	0	0	0	0	0	0	0	0	0	0	0	0	0	0	0	0	0	0	1	0	1	0	0	0	0	0
N-Acetyl-D-glucosamine ABC transport system, sugar-binding protein	Chitin and N-acetylglucosamine utilization	2	0	0	0	0	0	0	0	0	0	0	0	0	0	0	0	0	0	0	0	0	0	0	0	0	0	0	0	0	0	0	0	0	0
N-Acetyl-D-glucosamine ABC transport system, sugar-binding protein	Chitin and N-acetylglucosamine utilization	0	0	0	0	0	0	0	0	1	0	0	0	0	0	0	0	0	0	0	0	0	0	0	0	0	0	0	0	0	0	0	0	1	0
N-Acetyl-D-glucosamine ABC transport system, sugar-binding protein	Chitin and N-acetylglucosamine utilization	1	0	0	1	0	1	0	0	0	1	0	0	0	1	0	0	0	1	0	0	1	1	1	0	1	0	0	0	1	0	0	1	1	0
N-Acetyl-D-glucosamine ABC transport system, sugar-binding protein	Chitin and N-acetylglucosamine utilization	0	1	0	1	0	0	0	1	0	0	0	0	0	1	0	0	0	0	1	0	1	1	1	0	0	0	1	0	1	1	0	1	0	1
N-Acetyl-D-glucosamine ABC transport system, sugar-binding protein	Chitin and N-acetylglucosamine utilization	0	0	0	0	0	0	0	0	0	0	0	0	1	1	0	0	0	0	1	1	1	1	0	0	0	1	1	0	0	0	0	1	0	1
N-Acetyl-D-glucosamine ABC transport system, sugar-binding protein	Chitin and N-acetylglucosamine utilization	0	0	0	1	0	0	0	0	0	0	0	0	0	1	1	0	0	1	0	1	0	1	1	1	0	0	0	1	0	0	0	0	0	0
N-Acetyl-D-glucosamine ABC transport system, sugar-binding protein	Chitin and N-acetylglucosamine utilization	0	1	0	0	0	0	0	0	0	0	0	0	0	0	0	0	0	1	1	0	1	0	0	0	1	0	0	0	0	0	0	1	0	0
N-Acetyl-D-glucosamine ABC transport system, sugar-binding protein	Chitin and N-acetylglucosamine utilization	0	0	0	2	0	0	0	0	0	0	0	0	0	0	0	2	0	0	0	0	0	0	2	0	0	0	0	0	0	0	0	0	0	0
N-Acetyl-D-glucosamine ABC transport system, sugar-binding protein	Chitin and N-acetylglucosamine utilization	5	0	0	0	0	0	0	0	0	0	0	0	0	0	0	0	0	0	0	0	0	0	0	0	0	0	0	0	0	0	0	0	0	0
N-Acetyl-D-glucosamine ABC transport system, sugar-binding protein	Chitin and N-acetylglucosamine utilization	0	0	0	0	0	0	0	0	0	0	0	0	0	0	0	0	0	0	0	0	0	0	0	0	1	0	1	0	1	0	0	0	1	0
N-Acetyl-D-glucosamine ABC transport system, sugar-binding protein	Chitin and N-acetylglucosamine utilization	0	0	0	0	0	0	0	0	0	0	0	0	0	0	0	0	0	0	1	0	1	0	0	1	0	0	0	0	0	0	0	1	0	0
N-Acetyl-D-glucosamine ABC transport system, sugar-binding protein	Chitin and N-acetylglucosamine utilization	0	0	0	1	0	0	0	0	0	0	0	0	0	0	0	0	0	0	0	1	0	0	0	0	1	0	0	0	0	0	0	0	0	0
N-Acetyl-D-glucosamine ABC transport system, sugar-binding protein	Chitin and N-acetylglucosamine utilization	0	0	0	0	0	0	0	0	0	0	0	0	0	0	1	0	0	0	0	0	0	0	0	1	0	0	0	1	0	0	0	0	0	0
N-Acetyl-D-glucosamine ABC transport system, sugar-binding protein	Chitin and N-acetylglucosamine utilization	0	0	0	0	0	0	0	0	0	0	0	0	0	0	1	0	0	0	0	0	0	0	0	1	0	0	0	1	0	0	0	0	0	0
N-Acetyl-D-glucosamine ABC transport system, sugar-binding protein	Chitin and N-acetylglucosamine utilization	0	0	0	0	0	0	0	0	0	0	0	0	0	0	1	0	0	0	0	0	0	0	0	1	0	0	0	1	0	0	0	0	0	0
N-Acetyl-D-glucosamine ABC transport system, sugar-binding protein	Chitin and N-acetylglucosamine utilization	0	0	0	0	0	0	0	0	1	0	0	0	0	0	0	0	0	0	0	0	0	0	0	0	1	0	0	0	0	0	0	0	0	0
N-Acetyl-D-glucosamine ABC transport system, sugar-binding protein	Chitin and N-acetylglucosamine utilization	0	0	0	0	0	0	0	0	0	0	0	0	0	0	0	0	0	0	0	0	0	0	0	0	0	0	1	0	1	0	0	0	0	0
N-Acetyl-D-glucosamine ABC transport system, sugar-binding protein	Chitin and N-acetylglucosamine utilization	0	0	0	0	0	0	0	1	0	0	0	0	0	0	0	0	0	0	0	1	0	0	0	0	0	0	0	0	0	0	0	0	0	0
N-acetylglucosamine kinase of eukaryotic type (EC 2.7.1.59)	Chitin and N-acetylglucosamine utilization	0	0	0	1	0	0	0	0	0	0	0	0	0	1	0	0	0	0	1	0	1	1	1	0	0	0	0	0	0	1	0	0	0	0
N-acetylglucosamine kinase of eukaryotic type (EC 2.7.1.59)	Chitin and N-acetylglucosamine utilization	0	0	0	0	0	0	0	0	0	0	0	0	0	0	0	0	0	1	0	0	0	0	0	0	1	0	0	0	0	0	0	0	0	0
N-acetylglucosamine kinase of eukaryotic type (EC 2.7.1.59)	Chitin and N-acetylglucosamine utilization	0	0	0	0	0	1	0	0	0	0	0	0	0	0	0	0	0	1	0	0	0	0	0	0	0	0	0	0	0	0	0	0	0	0
N-acetylglucosamine-6-phosphate deacetylase (EC 3.5.1.25)	Chitin and N-acetylglucosamine utilization	0	0	0	0	1	0	0	0	0	0	0	1	0	0	0	0	0	0	0	0	0	0	0	0	0	0	0	0	0	0	0	0	0	0
N-acetylglucosamine-6-phosphate deacetylase (EC 3.5.1.25)	Chitin and N-acetylglucosamine utilization	0	0	0	0	0	0	0	1	0	0	0	0	0	0	0	0	0	0	0	1	0	0	0	0	0	0	0	0	0	0	0	0	0	0
N-acetylglucosamine-6-phosphate deacetylase (EC 3.5.1.25)	Chitin and N-acetylglucosamine utilization	0	0	0	0	0	0	0	1	0	0	0	0	0	0	0	0	0	0	0	1	0	0	0	0	0	0	0	0	0	0	0	0	0	0
Predicted N-acetyl-glucosamine kinase 2, ROK family (EC 2.7.1.59)	Chitin and N-acetylglucosamine utilization	1	0	1	1	0	0	0	0	0	0	0	0	0	1	1	0	0	1	1	0	1	1	1	1	1	0	1	1	1	0	0	0	0	0
Predicted N-acetyl-glucosamine kinase 2, ROK family (EC 2.7.1.59)	Chitin and N-acetylglucosamine utilization	1	0	1	0	0	0	0	0	0	0	0	0	0	0	0	0	0	1	0	1	0	0	0	0	1	0	0	0	0	0	1	0	0	0
Predicted N-acetyl-glucosamine kinase 2, ROK family (EC 2.7.1.59)	Chitin and N-acetylglucosamine utilization	0	0	0	0	0	0	0	0	0	0	0	0	0	1	0	0	0	0	0	0	0	1	0	0	0	0	0	0	0	1	0	0	0	0
Predicted N-acetyl-glucosamine kinase 2, ROK family (EC 2.7.1.59)	Chitin and N-acetylglucosamine utilization	0	0	0	0	0	0	0	0	0	0	0	0	0	1	0	0	0	0	0	0	0	1	0	0	0	0	0	0	0	1	0	0	0	0
Predicted transcriptional regulator of N-Acetylglucosamine utilization, GntR family	Chitin and N-acetylglucosamine utilization	0	0	0	0	0	0	0	0	1	0	0	0	0	0	0	0	0	0	0	0	0	0	0	0	0	0	0	0	1	0	0	0	0	0
Predicted transcriptional regulator of N-Acetylglucosamine utilization, GntR family	Chitin and N-acetylglucosamine utilization	0	0	0	0	0	0	0	0	0	0	0	0	0	0	0	0	0	0	1	0	1	0	0	0	0	0	1	0	1	0	0	1	0	0
Predicted transcriptional regulator of N-Acetylglucosamine utilization, GntR family	Chitin and N-acetylglucosamine utilization	0	0	0	0	0	0	0	0	0	0	0	0	1	0	1	0	0	0	0	0	0	0	0	1	0	0	0	1	0	0	0	0	0	0
2-oxoglutarate dehydrogenase E1 component (EC 1.2.4.2)	Dehydrogenase complexes	0	0	0	0	1	0	0	0	0	0	0	1	0	0	0	0	0	0	0	0	0	0	0	0	0	0	0	0	0	0	0	0	0	0
Acetoin dehydrogenase E1 component alpha-subunit (EC 1.2.4.-)	Dehydrogenase complexes	0	0	0	0	1	0	0	0	0	0	0	1	0	0	0	0	0	0	0	0	0	0	0	0	0	0	0	0	0	0	0	0	0	0
Acetoin dehydrogenase E1 component alpha-subunit (EC 1.2.4.-)	Dehydrogenase complexes	0	1	0	1	0	0	0	1	0	1	0	1	0	0	1	1	0	0	0	0	0	0	1	1	0	1	0	1	0	0	0	0	0	1
Acetoin dehydrogenase E1 component alpha-subunit (EC 1.2.4.-)	Dehydrogenase complexes	0	0	0	0	1	1	0	0	0	0	0	0	0	0	0	0	0	0	0	1	0	0	0	0	0	0	0	0	0	0	0	0	0	0
Acetoin dehydrogenase E1 component alpha-subunit (EC 1.2.4.-)	Dehydrogenase complexes	0	0	0	0	0	0	0	0	0	0	0	0	0	1	0	0	0	0	0	0	0	1	0	0	0	0	0	0	0	0	0	0	0	0
Acetoin dehydrogenase E1 component alpha-subunit (EC 1.2.4.-)	Dehydrogenase complexes	0	0	0	0	0	0	0	0	0	0	0	0	0	1	0	0	0	0	0	0	0	1	0	0	0	0	0	0	0	0	0	0	0	0
Acetoin dehydrogenase E1 component alpha-subunit (EC 1.2.4.-)	Dehydrogenase complexes	0	0	0	0	0	0	0	0	0	0	0	0	0	0	0	0	0	0	1	0	0	0	0	0	0	0	0	0	0	0	0	1	0	0
Acetoin dehydrogenase E1 component beta-subunit (EC 1.2.4.-)	Dehydrogenase complexes	0	1	0	1	0	0	0	1	0	1	0	1	0	0	1	1	0	0	0	0	0	0	1	1	0	1	0	1	0	0	0	0	0	1
Acetoin dehydrogenase E1 component beta-subunit (EC 1.2.4.-)	Dehydrogenase complexes	0	0	0	0	0	1	0	0	0	0	0	3	0	0	0	0	0	0	0	1	0	0	0	0	0	0	0	0	0	0	0	0	0	0
Acetoin dehydrogenase E1 component beta-subunit (EC 1.2.4.-)	Dehydrogenase complexes	0	0	0	0	0	0	0	0	0	0	0	0	0	1	0	0	0	0	0	0	0	1	0	0	0	0	0	0	0	0	0	0	0	0
Acetoin dehydrogenase E1 component beta-subunit (EC 1.2.4.-)	Dehydrogenase complexes	0	0	0	0	0	0	0	0	0	0	0	0	0	1	0	0	0	0	0	0	0	1	0	0	0	0	0	0	0	0	0	0	0	0
Dihydrolipoamide acetyltransferase component (E2) of acetoin dehydrogenase complex (EC 2.3.1.-)	Dehydrogenase complexes	0	0	0	0	1	0	0	0	0	0	0	1	0	0	0	0	0	0	0	0	0	0	0	0	0	0	0	0	0	0	0	0	0	0
Dihydrolipoamide acetyltransferase component (E2) of acetoin dehydrogenase complex (EC 2.3.1.-)	Dehydrogenase complexes	0	0	0	0	1	0	0	0	0	0	0	1	0	0	0	0	0	0	0	0	0	0	0	0	0	0	0	0	0	0	0	0	0	0
Dihydrolipoamide acetyltransferase component (E2) of acetoin dehydrogenase complex (EC 2.3.1.-)	Dehydrogenase complexes	0	0	0	0	0	1	0	0	0	0	0	0	0	0	0	0	0	0	0	1	0	0	0	0	0	0	0	0	0	0	0	0	0	0
Dihydrolipoamide succinyltransferase component (E2) of 2-oxoglutarate dehydrogenase complex (EC 2.3.1.61)	Dehydrogenase complexes	0	0	0	0	1	0	0	0	0	0	0	1	0	0	0	0	0	0	0	0	0	0	0	0	0	0	0	0	0	0	0	0	0	0
Dihydrolipoamide succinyltransferase component (E2) of 2-oxoglutarate dehydrogenase complex (EC 2.3.1.61)	Dehydrogenase complexes	1	1	1	1	0	1	1	1	1	1	2	0	1	1	1	1	1	1	1	1	1	1	1	1	1	1	1	1	1	1	1	1	1	1
Deoxyribonucleoside regulator DeoR (transcriptional repressor)	Deoxyribose and Deoxynucleoside Catabolism	0	1	0	1	0	1	0	1	0	1	0	0	1	1	1	1	0	1	1	0	1	1	1	1	1	1	1	1	1	1	1	1	1	1
Deoxyribose-phosphate aldolase (EC 4.1.2.4)	Deoxyribose and Deoxynucleoside Catabolism	0	0	1	0	0	0	0	0	0	0	0	0	0	0	0	0	0	0	0	0	0	0	0	0	0	0	0	0	0	0	1	0	0	0
Deoxyribose-phosphate aldolase (EC 4.1.2.4)	Deoxyribose and Deoxynucleoside Catabolism	1	1	1	1	0	1	1	1	1	1	0	0	1	1	1	1	0	1	1	1	1	1	1	1	1	1	0	1	0	1	0	1	0	1
Deoxyribose-phosphate aldolase (EC 4.1.2.4)	Deoxyribose and Deoxynucleoside Catabolism	0	0	0	0	1	0	0	0	0	0	0	1	0	0	0	0	0	0	0	0	0	0	0	0	0	0	0	0	0	0	0	0	0	0
Deoxyribose-phosphate aldolase (EC 4.1.2.4)	Deoxyribose and Deoxynucleoside Catabolism	0	0	0	0	0	0	0	0	0	0	1	0	0	0	0	0	0	0	1	0	1	0	0	0	0	0	2	0	2	0	1	1	0	0
Deoxyribose-phosphate aldolase (EC 4.1.2.4)	Deoxyribose and Deoxynucleoside Catabolism	0	0	0	0	0	0	0	0	0	0	0	0	0	0	0	0	0	0	1	0	1	0	0	0	0	0	0	0	0	0	0	0	0	0
Phosphopentomutase (EC 5.4.2.7)	Deoxyribose and Deoxynucleoside Catabolism	0	0	0	0	1	0	0	0	0	0	0	1	0	0	0	0	0	0	0	0	0	0	0	0	0	0	0	0	0	0	0	0	0	0
Ribokinase (EC 2.7.1.15)	D-ribose utilization	0	0	0	0	0	0	0	0	0	0	0	0	0	0	1	0	0	0	0	1	0	0	0	1	0	0	0	1	0	0	0	0	0	0
5-dehydro-4-deoxyglucarate dehydratase (EC 4.2.1.41)	D-galactarate, D-glucarate and D-glycerate catabolism	1	0	0	0	0	0	0	0	0	0	0	0	1	0	0	0	0	0	0	0	0	0	0	0	0	0	0	0	0	0	0	0	0	0
Glucarate dehydratase (EC 4.2.1.40)	D-galactarate, D-glucarate and D-glycerate catabolism	0	0	0	0	0	0	0	0	1	0	0	0	1	0	0	0	0	0	0	0	0	0	0	0	0	0	0	0	0	0	0	0	0	0
Glucarate dehydratase (EC 4.2.1.40)	D-galactarate, D-glucarate and D-glycerate catabolism	0	0	0	0	0	0	0	0	1	0	0	0	1	0	0	0	0	0	0	0	0	0	0	0	0	0	0	0	0	0	0	0	0	0
Sugar diacid utilization regulator SdaR	D-galactarate, D-glucarate and D-glycerate catabolism - gjo	0	1	0	1	0	1	0	1	0	1	0	0	0	0	1	1	0	0	0	0	0	0	1	1	0	1	0	1	0	0	0	0	0	1
2-keto-3-deoxygluconate permease (KDG permease)	D-Galacturonate and D-Glucuronate Utilization	0	0	0	1	0	1	0	0	0	0	0	0	0	0	0	1	0	0	0	0	0	0	1	0	0	0	0	0	0	1	0	0	0	0
4-deoxy-L-threo-5-hexosulose-uronate ketol-isomerase (EC 5.3.1.17)	D-Galacturonate and D-Glucuronate Utilization	0	0	0	0	0	1	0	0	0	0	0	0	0	0	0	0	0	0	0	0	0	0	0	0	0	0	1	0	0	0	0	0	0	0
D-mannonate oxidoreductase (EC 1.1.1.57)	D-Galacturonate and D-Glucuronate Utilization	1	0	0	0	0	0	0	0	0	0	0	0	0	0	0	0	0	0	0	0	0	0	0	0	0	0	0	0	1	0	0	0	0	0
D-mannonate oxidoreductase (EC 1.1.1.57)	D-Galacturonate and D-Glucuronate Utilization	0	0	0	1	0	0	0	0	0	0	0	0	0	0	0	1	0	0	0	0	0	0	1	0	0	0	0	0	0	1	0	0	0	0
Pectate lyase precursor (EC 4.2.2.2)	D-Galacturonate and D-Glucuronate Utilization	0	0	0	1	0	0	0	0	0	0	0	0	0	0	0	1	0	0	0	0	0	0	1	0	0	0	0	0	0	0	0	0	0	0
Uronate isomerase (EC 5.3.1.12)	D-Galacturonate and D-Glucuronate Utilization	1	0	0	0	0	0	0	0	0	0	0	0	0	0	0	0	0	0	0	0	0	0	0	0	0	0	0	0	1	0	0	0	0	0
Uronate isomerase (EC 5.3.1.12)	D-Galacturonate and D-Glucuronate Utilization	0	0	0	1	0	0	0	0	0	0	0	0	0	0	0	1	0	0	0	0	0	0	1	0	0	0	0	0	0	1	0	0	0	0
Gluconate 2-dehydrogenase (EC 1.1.99.3)	0	0	1	0	0	0	0	0	1	0	0	0	0	0	0	0	0	0	0	0	0	0	0	0	0	0	0	0	0	0	1	0	0	0	0
Gluconate permease	D-gluconate and ketogluconates metabolism	0	1	0	1	0	0	0	1	0	0	0	0	0	1	0	0	0	0	0	0	0	1	1	0	0	0	0	0	0	1	0	0	0	0
Gluconate permease	D-gluconate and ketogluconates metabolism	0	0	0	0	0	0	0	0	0	0	0	0	0	1	0	0	0	0	0	0	0	1	0	0	0	0	0	0	0	0	0	0	0	0
Gluconate transporter family protein	D-gluconate and ketogluconates metabolism	0	0	1	0	0	0	0	0	0	0	0	0	0	0	0	0	0	0	1	0	1	0	0	0	0	0	1	0	1	0	0	1	0	0
Gluconokinase (EC 2.7.1.12)	Entner-Doudoroff Pathway	0	0	0	0	1	0	0	0	0	0	0	1	0	0	0	0	0	0	0	0	0	0	0	0	0	0	0	0	0	0	0	0	0	0
L-idonate 5-dehydrogenase (EC 1.1.1.264)	D-gluconate and ketogluconates metabolism	0	0	0	0	0	0	0	0	1	0	0	0	0	0	0	0	0	0	0	0	0	0	0	0	0	0	0	0	0	0	0	0	1	0
Dihydroxyacetone kinase, ATP-dependent (EC 2.7.1.29)	Dihydroxyacetone kinases	0	0	0	1	0	0	0	0	0	0	0	0	0	0	0	0	0	0	0	0	0	0	1	0	0	0	0	0	0	0	0	0	0	0
Dihydroxyacetone kinase, ATP-dependent (EC 2.7.1.29)	Dihydroxyacetone kinases	1	0	0	0	0	0	0	0	1	0	0	0	0	0	0	0	0	0	0	0	0	0	0	0	0	0	0	0	0	0	0	0	0	0
Dihydroxyacetone kinase, ATP-dependent (EC 2.7.1.29)	Dihydroxyacetone kinases	0	1	0	0	0	0	0	1	0	1	0	0	0	1	0	1	0	0	1	0	0	1	0	0	0	1	1	0	1	0	0	1	0	1
Dihydroxyacetone kinase, ATP-dependent (EC 2.7.1.29)	Dihydroxyacetone kinases	0	1	0	0	0	0	0	1	0	1	0	0	0	1	0	1	0	0	0	0	0	1	0	0	0	1	1	0	1	0	0	0	0	1
Dihydroxyacetone kinase, ATP-dependent (EC 2.7.1.29)	Dihydroxyacetone kinases	0	0	0	1	0	1	0	0	0	0	0	0	0	0	0	0	0	0	0	0	0	0	1	0	0	0	0	0	0	0	0	0	0	0
Dihydroxyacetone kinase, ATP-dependent (EC 2.7.1.29)	Dihydroxyacetone kinases	0	0	0	0	0	0	0	0	0	0	0	0	0	1	0	0	0	0	0	0	0	1	0	0	0	0	0	0	0	0	0	0	0	0
Phosphoenolpyruvate-dihydroxyacetone phosphotransferase (EC 2.7.1.121), ADP-binding subunit DhaL	Dihydroxyacetone kinases	1	1	0	1	1	1	1	1	0	1	0	1	1	1	1	1	0	1	2	0	2	1	1	1	1	1	1	1	1	1	1	2	1	1
Phosphoenolpyruvate-dihydroxyacetone phosphotransferase (EC 2.7.1.121), ADP-binding subunit DhaL	Dihydroxyacetone kinases	0	1	0	1	0	1	0	1	0	0	0	0	0	0	0	0	0	0	0	0	0	0	1	0	0	0	0	0	0	0	0	0	0	0
Phosphoenolpyruvate-dihydroxyacetone phosphotransferase (EC 2.7.1.121), ADP-binding subunit DhaL	Dihydroxyacetone kinases	0	1	0	0	0	0	0	1	0	0	0	0	0	0	0	0	0	0	0	0	0	0	0	0	0	0	0	0	0	1	0	0	0	0
Phosphoenolpyruvate-dihydroxyacetone phosphotransferase (EC 2.7.1.121), DhaK	0	1	1	0	1	1	1	0	1	0	1	0	1	1	1	1	1	0	1	1	0	1	1	1	1	1	1	1	1	1	1	1	1	1	1
Phosphoenolpyruvate-dihydroxyacetone phosphotransferase (EC 2.7.1.121), DhaK	0	0	1	0	0	0	0	0	1	0	0	0	0	0	0	0	0	0	0	1	0	1	0	0	0	0	0	0	0	0	1	0	1	0	0
Phosphoenolpyruvate-dihydroxyacetone phosphotransferase (EC 2.7.1.121), DhaM	0	1	1	0	1	1	1	1	1	0	1	1	1	1	1	1	1	0	1	1	0	1	1	1	1	1	1	1	1	1	1	0	1	0	1
Putative dihydroxyacetone kinase (EC 2.7.1.29), ADP-binding subunit	Dihydroxyacetone kinases	0	0	0	1	0	0	0	1	0	0	0	0	0	0	0	0	0	0	0	0	0	0	1	0	0	0	0	0	0	0	0	0	0	0
Putative dihydroxyacetone kinase (EC 2.7.1.29), dihydroxyacetone binding subunit	Dihydroxyacetone kinases	0	0	0	1	0	0	0	1	0	0	0	0	0	0	0	0	0	0	0	0	0	0	1	0	0	0	0	0	0	0	0	0	0	0
Inositol-1-phosphate synthase (EC 5.5.1.4)	Di-Inositol-Phosphate biosynthesis	0	0	0	0	2	0	0	0	0	0	0	0	0	0	0	0	0	0	0	0	0	0	0	0	0	0	0	0	0	0	0	0	0	0
Predicted nucleoside ABC transporter, substrate-binding component	D-ribose utilization	0	0	0	0	0	0	0	0	0	0	0	0	0	0	0	0	1	0	0	0	0	0	0	0	0	0	0	0	0	0	1	0	1	0
Ribokinase (EC 2.7.1.15)	D-ribose utilization	0	0	1	0	0	0	0	0	0	0	0	0	0	0	0	0	0	0	0	0	0	0	0	0	0	0	0	0	0	0	1	0	0	0
Ribokinase (EC 2.7.1.15)	D-ribose utilization	0	0	0	0	1	0	0	0	0	0	0	1	0	0	0	0	0	0	0	0	0	0	0	0	0	0	0	0	0	0	0	0	0	0
Ribokinase (EC 2.7.1.15)	D-ribose utilization	0	1	0	1	0	1	0	1	0	1	0	0	1	1	1	1	0	0	0	0	0	1	1	1	0	1	1	1	1	1	0	0	0	1
Ribokinase (EC 2.7.1.15)	D-ribose utilization	0	1	0	1	0	0	0	1	0	0	0	0	0	1	1	0	0	0	1	0	1	1	1	1	0	0	1	1	1	0	0	1	0	0
Ribokinase (EC 2.7.1.15)	D-ribose utilization	0	0	0	0	0	0	0	0	1	0	0	0	0	0	0	0	0	1	0	0	0	0	0	0	1	0	0	0	1	0	0	0	0	0
Ribokinase (EC 2.7.1.15)	D-ribose utilization	0	0	0	0	0	0	0	0	1	1	0	0	0	0	0	0	0	0	0	0	0	0	0	0	0	0	0	0	0	1	0	0	0	0
Ribokinase (EC 2.7.1.15)	D-ribose utilization	0	0	0	0	0	0	0	0	0	0	0	0	0	0	0	0	0	1	0	0	0	0	0	0	1	0	0	0	0	0	0	0	0	0
Ribose ABC transport system, ATP-binding protein RbsA (TC 3.A.1.2.1)	D-ribose utilization	0	0	0	0	0	0	0	0	1	0	0	0	0	0	1	0	0	0	0	0	0	0	0	0	0	0	0	0	0	0	0	0	0	0
Ribose ABC transport system, ATP-binding protein RbsA (TC 3.A.1.2.1)	D-ribose utilization	0	0	0	0	0	1	0	0	0	0	0	0	0	0	1	0	0	0	0	0	0	0	0	0	0	0	0	0	0	0	0	0	0	0
Ribose ABC transport system, ATP-binding protein RbsA (TC 3.A.1.2.1)	D-ribose utilization	0	0	0	0	1	1	0	0	0	0	0	0	0	0	0	0	0	0	0	0	0	0	0	0	0	0	0	0	0	0	0	0	0	0
Ribose ABC transport system, ATP-binding protein RbsA (TC 3.A.1.2.1)	D-ribose utilization	0	1	0	1	0	0	0	1	0	0	0	0	0	1	1	0	0	0	1	0	1	1	1	1	0	0	1	1	1	0	0	1	0	0
Ribose ABC transport system, ATP-binding protein RbsA (TC 3.A.1.2.1)	D-ribose utilization	0	1	0	1	0	0	0	1	0	1	0	0	0	0	1	1	0	0	0	0	0	0	1	1	0	1	0	1	0	0	0	0	0	1
Ribose ABC transport system, ATP-binding protein RbsA (TC 3.A.1.2.1)	D-ribose utilization	1	0	1	0	1	0	1	0	0	1	0	0	0	0	0	0	0	1	0	0	0	0	0	0	1	0	0	0	0	0	0	0	0	0
Ribose ABC transport system, ATP-binding protein RbsA (TC 3.A.1.2.1)	D-ribose utilization	0	0	0	0	0	0	0	0	1	0	0	0	1	0	0	1	0	0	0	0	0	0	0	0	0	0	0	0	1	1	0	0	1	1
Ribose ABC transport system, ATP-binding protein RbsA (TC 3.A.1.2.1)	D-ribose utilization	0	1	0	0	0	1	0	1	0	0	0	0	0	0	0	0	0	0	0	0	0	0	0	0	0	1	0	0	0	1	0	1	0	0
Ribose ABC transport system, ATP-binding protein RbsA (TC 3.A.1.2.1)	D-ribose utilization	0	0	0	0	1	0	0	0	0	0	0	0	0	0	0	0	0	1	0	0	0	0	0	0	1	0	0	0	0	0	1	0	0	0
Ribose ABC transport system, ATP-binding protein RbsA (TC 3.A.1.2.1)	D-ribose utilization	0	0	0	1	0	0	0	1	0	0	0	0	0	0	0	0	0	0	0	0	0	0	1	0	0	0	0	0	0	0	0	0	0	0
Ribose ABC transport system, ATP-binding protein RbsA (TC 3.A.1.2.1)	D-ribose utilization	0	1	0	0	0	0	0	1	0	0	0	0	0	0	0	0	0	0	0	0	0	0	0	0	0	0	0	0	0	1	0	0	0	0
Ribose ABC transport system, ATP-binding protein RbsA (TC 3.A.1.2.1)	D-ribose utilization	0	0	0	0	0	0	0	0	0	0	0	0	0	1	0	0	0	0	0	0	0	1	0	0	0	0	0	0	0	1	0	0	0	0
Ribose ABC transport system, ATP-binding protein RbsA (TC 3.A.1.2.1)	D-ribose utilization	0	0	0	1	0	1	0	0	0	0	0	0	0	0	0	0	0	0	0	0	0	0	1	0	0	0	0	0	0	0	0	0	0	0
Ribose ABC transport system, ATP-binding protein RbsA (TC 3.A.1.2.1)	D-ribose utilization	0	0	1	0	1	0	0	0	0	0	0	0	0	0	0	0	0	0	0	0	0	0	0	0	0	0	0	0	0	0	1	0	0	0
Ribose ABC transport system, high affinity permease RbsD (TC 3.A.1.2.1)	D-ribose utilization	0	1	0	1	1	0	0	1	0	0	0	0	0	1	1	0	0	0	1	0	1	1	1	1	0	0	1	1	1	0	0	1	0	0
Ribose ABC transport system, high affinity permease RbsD (TC 3.A.1.2.1)	D-ribose utilization	0	0	0	0	0	1	1	0	0	0	0	0	0	0	0	0	0	0	0	0	0	0	0	0	0	0	0	0	0	1	0	0	0	0
Ribose ABC transport system, high affinity permease RbsD (TC 3.A.1.2.1)	D-ribose utilization	0	0	1	0	1	0	0	0	0	0	0	0	0	0	0	0	0	0	0	0	0	0	0	0	0	0	0	0	0	0	1	0	0	0
Ribose ABC transport system, periplasmic ribose-binding protein RbsB (TC 3.A.1.2.1)	D-ribose utilization	0	0	0	0	0	1	0	0	0	0	0	0	0	0	1	0	0	0	0	0	0	0	0	0	0	0	0	0	0	0	0	0	0	0
Ribose ABC transport system, periplasmic ribose-binding protein RbsB (TC 3.A.1.2.1)	D-ribose utilization	0	1	0	1	1	0	0	1	0	0	0	0	0	1	1	0	0	0	1	0	1	1	1	1	0	0	1	1	1	0	0	1	0	0
Ribose ABC transport system, periplasmic ribose-binding protein RbsB (TC 3.A.1.2.1)	D-ribose utilization	0	1	0	0	0	0	0	1	0	0	0	0	0	0	0	0	0	0	0	0	0	0	0	0	0	0	0	0	0	1	0	0	0	0
Ribose ABC transport system, periplasmic ribose-binding protein RbsB (TC 3.A.1.2.1)	D-ribose utilization	0	0	0	1	0	1	0	0	0	0	0	0	0	0	0	0	0	0	0	0	0	0	1	0	0	0	0	0	0	0	0	0	0	0
Ribose ABC transport system, permease protein RbsC (TC 3.A.1.2.1)	D-ribose utilization	0	0	0	0	0	1	0	0	0	0	0	0	0	0	1	0	0	0	0	0	0	0	0	0	0	0	0	0	0	0	0	0	0	0
Ribose ABC transport system, permease protein RbsC (TC 3.A.1.2.1)	D-ribose utilization	0	0	0	0	0	0	0	0	1	0	0	0	0	0	1	0	0	0	0	0	0	0	0	0	0	0	0	0	0	0	0	0	0	0
Ribose ABC transport system, permease protein RbsC (TC 3.A.1.2.1)	D-ribose utilization	0	0	0	0	0	1	0	0	0	0	0	0	0	0	1	0	0	0	0	0	0	0	0	0	0	0	0	0	0	0	0	0	0	0
Ribose ABC transport system, permease protein RbsC (TC 3.A.1.2.1)	D-ribose utilization	0	0	0	1	0	0	0	0	0	0	0	0	0	0	0	0	0	0	0	0	0	0	1	0	0	0	0	0	0	0	0	0	0	0
Ribose ABC transport system, permease protein RbsC (TC 3.A.1.2.1)	D-ribose utilization	0	1	0	1	1	0	0	1	0	0	0	0	0	1	1	0	0	0	1	0	1	1	1	1	0	0	1	1	1	1	0	1	0	0
Ribose ABC transport system, permease protein RbsC (TC 3.A.1.2.1)	D-ribose utilization	0	1	0	1	0	0	0	1	0	1	0	0	0	0	1	1	0	0	0	0	0	0	1	1	0	1	0	1	0	0	0	0	0	1
Ribose ABC transport system, permease protein RbsC (TC 3.A.1.2.1)	D-ribose utilization	0	1	0	1	0	0	0	1	0	1	0	0	0	0	1	1	0	0	0	0	0	0	1	1	0	1	0	1	0	0	0	0	0	1
Ribose ABC transport system, permease protein RbsC (TC 3.A.1.2.1)	D-ribose utilization	0	1	0	1	0	0	0	1	0	1	0	0	0	0	1	1	0	0	0	0	0	0	1	1	0	1	0	1	0	0	0	0	0	1
Ribose ABC transport system, permease protein RbsC (TC 3.A.1.2.1)	D-ribose utilization	0	0	0	0	0	0	0	0	1	0	0	0	1	0	0	1	0	0	0	0	0	0	0	0	0	0	0	0	1	1	0	0	1	1
Ribose ABC transport system, permease protein RbsC (TC 3.A.1.2.1)	D-ribose utilization	1	0	1	0	0	0	1	0	0	1	0	0	0	0	0	0	0	1	0	0	0	0	0	0	1	0	0	0	0	0	0	0	0	0
Ribose ABC transport system, permease protein RbsC (TC 3.A.1.2.1)	D-ribose utilization	0	0	0	0	0	0	0	0	1	0	0	0	0	0	0	0	0	1	0	0	0	0	0	0	1	0	1	0	1	0	0	0	0	0
Ribose ABC transport system, permease protein RbsC (TC 3.A.1.2.1)	D-ribose utilization	0	1	0	0	0	0	0	1	0	0	0	0	0	1	0	0	0	0	0	0	0	1	0	0	0	0	0	0	0	1	0	0	0	0
Ribose ABC transport system, permease protein RbsC (TC 3.A.1.2.1)	D-ribose utilization	0	0	0	0	0	0	0	0	0	0	0	0	0	0	1	0	0	0	0	0	0	0	0	1	1	0	0	1	0	0	0	0	0	0
Ribose ABC transport system, permease protein RbsC (TC 3.A.1.2.1)	D-ribose utilization	0	1	0	1	0	0	0	0	0	0	0	0	0	0	0	0	0	0	0	0	0	0	1	0	0	0	0	0	0	1	0	0	0	0
Ribose ABC transport system, permease protein RbsC (TC 3.A.1.2.1)	D-ribose utilization	0	0	0	0	0	0	0	0	0	0	0	0	0	0	0	0	0	1	0	0	0	0	0	0	1	0	0	0	0	0	1	0	0	0
Ribose ABC transport system, permease protein RbsC (TC 3.A.1.2.1)	D-ribose utilization	0	0	0	0	0	0	0	0	0	0	0	0	0	0	0	0	0	1	0	0	0	0	0	0	1	0	0	0	0	0	1	0	0	0
Ribose ABC transport system, permease protein RbsC (TC 3.A.1.2.1)	D-ribose utilization	0	0	0	1	0	0	0	1	0	0	0	0	0	0	0	0	0	0	0	0	0	0	1	0	0	0	0	0	0	0	0	0	0	0
Ribose ABC transport system, permease protein RbsC (TC 3.A.1.2.1)	D-ribose utilization	0	0	0	1	0	0	0	1	0	0	0	0	0	0	0	0	0	0	0	0	0	0	1	0	0	0	0	0	0	0	0	0	0	0
Ribose ABC transport system, permease protein RbsC (TC 3.A.1.2.1)	D-ribose utilization	0	1	0	0	0	0	0	1	0	0	0	0	0	0	0	0	0	0	0	0	0	0	0	0	0	0	0	0	0	1	0	0	0	0
Ribose ABC transport system, permease protein RbsC (TC 3.A.1.2.1)	D-ribose utilization	0	1	0	0	0	0	0	1	0	0	0	0	0	0	0	0	0	0	0	0	0	0	0	0	0	0	0	0	0	1	0	0	0	0
Ribose ABC transport system, permease protein RbsC (TC 3.A.1.2.1)	D-ribose utilization	0	0	0	1	0	1	0	0	0	0	0	0	0	0	0	0	0	0	0	0	0	0	1	0	0	0	0	0	0	0	0	0	0	0
Ribose ABC transport system, permease protein RbsC (TC 3.A.1.2.1)	D-ribose utilization	0	0	1	0	1	0	0	0	0	0	0	0	0	0	0	0	0	0	0	0	0	0	0	0	0	0	0	0	0	0	1	0	0	0
Ribose ABC transport system, permease protein RbsC (TC 3.A.1.2.1)	D-ribose utilization	2	1	1	1	0	1	1	1	1	1	0	0	1	1	1	1	0	1	1	1	1	1	1	1	1	1	1	1	1	1	0	1	1	1
Ribose operon repressor	D-ribose utilization	1	1	1	1	0	1	1	1	1	1	1	0	1	1	1	1	1	1	1	1	1	1	1	1	1	1	1	1	1	1	1	1	1	1
Ribose operon repressor	D-ribose utilization	0	0	1	0	0	0	0	0	1	1	0	0	0	0	0	0	0	1	0	0	0	0	0	0	1	0	0	0	0	0	0	0	0	0
Ribose operon repressor	D-ribose utilization	0	1	0	0	0	0	0	0	0	0	0	0	0	0	0	0	0	0	0	0	0	0	0	0	0	0	1	0	1	0	0	0	0	0
Ribose/xylose/arabinose/galactoside ABC-type transport systems, permease component 1	D-ribose utilization	0	0	0	1	0	1	0	0	0	0	0	0	0	0	0	0	0	0	0	0	0	0	1	0	0	0	0	0	0	0	0	0	0	0
2-dehydro-3-deoxygluconate kinase (EC 2.7.1.45)	Entner-Doudoroff Pathway	0	1	0	1	0	0	0	1	0	0	0	0	0	0	0	1	0	0	1	1	0	0	1	0	1	0	1	0	1	2	0	1	0	0
2-dehydro-3-deoxygluconate kinase (EC 2.7.1.45)	Entner-Doudoroff Pathway	1	0	0	0	0	0	0	0	0	0	0	0	0	0	1	0	0	1	0	0	0	0	0	1	1	0	1	1	0	0	0	0	0	0
2-dehydro-3-deoxygluconate kinase (EC 2.7.1.45)	Entner-Doudoroff Pathway	0	0	0	1	0	0	0	0	1	0	0	0	0	1	0	0	0	0	0	0	0	1	1	0	0	0	0	0	0	1	0	0	0	0
2-dehydro-3-deoxygluconate kinase (EC 2.7.1.45)	Entner-Doudoroff Pathway	0	0	0	1	0	1	0	0	0	0	0	0	0	0	0	0	0	0	0	0	0	0	1	0	0	0	0	0	0	0	0	0	0	0
2-dehydro-3-deoxygluconate kinase (EC 2.7.1.45)	Entner-Doudoroff Pathway	0	0	0	0	0	0	0	0	0	0	0	0	0	0	0	0	0	0	0	0	0	0	0	0	0	0	1	0	1	0	0	0	0	0
2-dehydro-3-deoxyphosphogluconate aldolase (EC 4.1.2.14)	Entner-Doudoroff Pathway	0	1	0	1	0	0	0	1	0	0	0	0	0	0	0	1	0	0	0	1	0	0	1	0	0	0	0	0	1	2	0	0	0	0
2-dehydro-3-deoxyphosphogluconate aldolase (EC 4.1.2.14)	Entner-Doudoroff Pathway	1	0	0	0	0	0	0	0	0	0	0	0	0	0	1	0	0	1	0	0	0	0	0	1	1	0	1	1	0	0	0	0	0	0
2-dehydro-3-deoxyphosphogluconate aldolase (EC 4.1.2.14)	Entner-Doudoroff Pathway	0	0	0	1	0	0	0	0	1	0	0	0	0	1	0	0	0	0	0	0	0	1	1	0	0	0	0	0	0	1	0	0	0	0
2-dehydro-3-deoxyphosphogluconate aldolase (EC 4.1.2.14)	Entner-Doudoroff Pathway	0	0	0	1	0	1	0	0	0	0	0	0	0	0	0	0	0	0	0	0	0	0	1	0	0	0	1	0	0	0	0	0	0	0
2-dehydro-3-deoxyphosphogluconate aldolase (EC 4.1.2.14)	Entner-Doudoroff Pathway	0	0	0	0	0	0	1	0	0	1	0	0	0	0	0	0	0	0	0	0	0	0	0	0	0	0	0	0	0	0	0	0	0	0
6-phosphogluconolactonase (EC 3.1.1.31)	0	1	1	1	1	0	1	0	1	0	1	0	0	1	1	1	1	0	1	1	1	1	1	1	1	1	1	1	1	1	1	0	1	0	1
ADP-dependent glucokinase (EC 2.7.1.147)	Entner-Doudoroff Pathway	0	0	0	0	0	0	0	0	1	0	0	0	0	0	0	0	0	0	0	0	0	0	0	0	0	0	0	0	0	0	0	0	1	0
Gluconate dehydratase (EC 4.2.1.39)	Entner-Doudoroff Pathway	0	1	0	0	0	0	0	0	0	0	0	0	0	0	0	0	0	0	0	0	0	0	0	1	0	0	0	0	0	0	0	0	0	0
Gluconokinase (EC 2.7.1.12)	Entner-Doudoroff Pathway	1	0	0	0	0	0	0	0	0	0	0	0	0	0	0	0	0	0	0	0	0	0	0	0	0	0	0	0	1	0	0	0	0	0
Gluconokinase (EC 2.7.1.12)	Entner-Doudoroff Pathway	0	0	0	0	0	0	0	0	1	0	0	0	0	0	0	0	0	0	0	0	0	0	0	0	0	0	0	0	0	0	0	0	1	0
Gluconokinase (EC 2.7.1.12)	Entner-Doudoroff Pathway	1	1	1	1	0	1	0	0	0	1	0	0	1	2	1	1	0	1	0	1	0	2	1	1	1	1	0	1	1	1	0	0	0	1
Gluconokinase (EC 2.7.1.12)	Entner-Doudoroff Pathway	0	0	0	1	0	1	0	0	0	0	0	0	0	0	0	0	0	0	0	0	0	0	1	0	0	0	0	0	1	0	0	0	0	0
Gluconokinase (EC 2.7.1.12)	Entner-Doudoroff Pathway	0	0	0	1	0	0	0	0	0	0	0	0	0	0	0	1	0	0	0	0	0	0	1	0	0	0	0	0	0	0	0	0	0	0
Gluconolactonase (EC 3.1.1.17)	Entner-Doudoroff Pathway	1	0	0	0	0	0	1	0	0	0	0	0	0	0	0	0	0	0	0	0	0	0	0	0	0	0	1	0	1	0	0	0	0	0
Gluconolactonase (EC 3.1.1.17)	Entner-Doudoroff Pathway	0	1	0	0	0	0	0	0	0	0	0	0	0	0	0	0	0	0	1	0	1	0	0	0	0	0	0	0	0	0	0	1	0	0
Gluconolactonase (EC 3.1.1.17)	Entner-Doudoroff Pathway	0	1	0	0	0	0	0	1	0	0	0	0	0	0	0	0	0	0	0	0	0	0	0	0	0	0	0	0	0	1	0	0	0	0
Glucose-6-phosphate 1-dehydrogenase (EC 1.1.1.49)	Entner-Doudoroff Pathway	1	1	1	2	1	1	1	1	1	1	1	1	2	1	1	2	1	1	1	1	1	1	2	1	1	1	1	1	1	1	1	1	1	1
Glucose-6-phosphate 1-dehydrogenase (EC 1.1.1.49)	Entner-Doudoroff Pathway	1	0	1	1	0	1	1	0	0	0	0	0	0	0	0	0	0	0	0	1	0	0	1	0	0	0	1	0	0	0	0	0	0	0
OpcA, an allosteric effector of glucose-6-phosphate dehydrogenase, actinobacterial	Entner-Doudoroff Pathway	1	1	1	1	0	1	1	1	1	1	1	0	1	1	1	1	0	1	1	1	1	1	1	1	1	1	1	1	1	1	1	1	1	1
OpcA, an allosteric effector of glucose-6-phosphate dehydrogenase, actinobacterial	Entner-Doudoroff Pathway	0	0	0	1	0	0	0	0	0	0	0	0	0	0	0	1	0	0	0	0	0	0	1	0	0	0	0	0	0	0	0	0	0	0
L-lactate dehydrogenase (EC 1.1.1.27)	Fermentations: Mixed acid	0	0	0	0	0	0	0	0	1	0	1	0	0	0	0	0	0	0	1	0	1	0	0	0	0	0	1	0	1	0	0	1	0	0
Pyruvate formate-lyase activating enzyme (EC 1.97.1.4)	Fermentations: Mixed acid	0	0	0	1	0	0	0	0	0	1	0	0	1	1	1	0	0	0	1	0	1	1	1	1	0	0	1	1	1	0	0	1	0	0
6-phospho-3-hexuloisomerase	Formaldehyde assimilation: Ribulose monophosphate pathway	0	0	0	0	0	0	0	0	0	0	0	0	0	0	1	0	0	0	0	0	0	0	0	1	0	0	0	1	0	0	0	0	0	0
6-phospho-3-hexuloisomerase	Formaldehyde assimilation: Ribulose monophosphate pathway	0	0	0	0	0	0	0	0	0	0	0	0	0	0	0	0	0	0	0	0	0	0	0	0	0	1	0	0	0	0	0	0	0	1
Beta-glucosidase (EC 3.2.1.21)	Fructooligosaccharides(FOS) and Raffinose Utilization	0	1	0	1	0	1	0	1	0	1	0	0	1	1	1	1	0	0	1	1	1	1	1	1	0	1	1	1	1	1	0	1	0	1
Beta-glucosidase (EC 3.2.1.21)	Fructooligosaccharides(FOS) and Raffinose Utilization	0	0	0	0	0	0	0	0	0	0	0	0	0	0	0	0	0	0	0	0	1	0	0	0	0	0	0	0	0	0	0	1	0	0
Multiple sugar ABC transporter, membrane-spanning permease protein MsmF	Fructooligosaccharides(FOS) and Raffinose Utilization	0	0	0	0	0	0	0	0	0	0	0	0	0	0	0	0	0	0	1	0	1	0	0	0	0	0	1	0	1	0	0	1	0	0
Multiple sugar ABC transporter, membrane-spanning permease protein MsmF	Fructooligosaccharides(FOS) and Raffinose Utilization	0	0	0	0	0	0	0	1	0	0	0	0	0	0	0	0	0	0	0	0	0	0	0	0	0	0	1	0	1	0	0	0	0	0
Multiple sugar ABC transporter, membrane-spanning permease protein MsmG	Fructooligosaccharides(FOS) and Raffinose Utilization	0	0	0	0	0	0	0	0	0	0	0	0	0	0	0	0	0	0	1	0	1	0	0	0	0	0	1	0	1	0	0	1	1	1
Multiple sugar ABC transporter, substrate-binding protein	Fructooligosaccharides(FOS) and Raffinose Utilization	0	0	0	0	0	0	0	0	0	0	0	0	0	0	0	0	0	0	1	0	1	0	0	0	0	0	1	0	1	0	0	1	0	0
Multiple sugar ABC transporter, substrate-binding protein	Fructooligosaccharides(FOS) and Raffinose Utilization	0	0	0	0	0	0	0	0	0	0	0	0	0	0	0	0	0	0	0	0	0	0	0	0	0	0	1	0	1	1	0	0	0	0
1-phosphofructokinase (EC 2.7.1.56)	Fructose utilization	0	0	0	0	1	0	0	0	0	0	0	1	0	0	0	0	0	0	0	0	0	0	0	0	0	0	0	0	0	0	0	0	0	0
1-phosphofructokinase (EC 2.7.1.56)	Fructose utilization	0	1	1	1	0	1	0	1	1	1	0	0	1	1	1	1	0	0	1	0	1	1	1	1	0	1	1	1	1	1	0	1	0	1
1-phosphofructokinase (EC 2.7.1.56)	Fructose utilization	0	0	0	0	0	0	0	0	0	0	0	0	0	0	1	0	0	1	0	0	0	0	0	1	1	0	0	1	0	0	0	0	0	0
Fructokinase (EC 2.7.1.4)	Mannitol Utilization	0	0	0	1	0	0	0	0	0	0	0	0	0	0	0	0	0	1	0	0	0	0	1	0	0	0	0	0	0	0	0	0	0	0
PTS system, fructose-specific IIB component (EC 2.7.1.69)	Fructose utilization	0	1	1	1	0	1	0	1	1	1	1	0	1	1	1	1	0	0	1	0	1	1	1	1	0	1	1	1	1	1	0	1	0	1
Transcriptional repressor of the fructose operon, DeoR family	Fructose utilization	0	0	0	0	0	1	0	0	0	0	0	0	0	0	0	0	0	0	0	0	0	0	0	0	0	0	0	0	0	0	0	0	1	0
Transcriptional repressor of the fructose operon, DeoR family	Fructose utilization	1	1	0	1	0	1	0	1	0	1	0	0	0	1	1	1	0	1	1	0	1	1	1	1	1	1	1	1	1	1	0	1	0	1
Transcriptional repressor of the fructose operon, DeoR family	Fructose utilization	0	1	1	1	0	1	0	1	1	1	0	0	1	1	1	1	0	0	1	0	1	1	1	1	0	1	1	1	1	1	0	1	0	1
Transcriptional repressor of the fructose operon, DeoR family	Fructose utilization	0	0	0	0	0	0	0	0	0	0	0	0	1	0	1	0	0	0	0	0	0	0	0	1	0	0	0	1	0	1	0	0	0	0
Transcriptional repressor of the fructose operon, DeoR family	Fructose utilization	0	0	0	0	0	0	0	0	0	0	0	0	1	0	1	0	0	0	0	0	0	0	0	1	0	0	0	1	0	1	0	0	0	0
Transcriptional repressor of the fructose operon, DeoR family	Fructose utilization	0	0	0	1	0	0	0	1	0	0	0	0	0	0	0	0	0	0	0	0	0	0	1	0	0	0	0	0	0	0	0	0	0	0
2-dehydro-3-deoxyglucarate aldolase (EC 4.1.2.20)	Glycerate metabolism	0	0	0	1	0	0	0	0	0	0	0	0	0	0	0	0	0	0	0	0	0	0	1	0	0	0	0	0	0	0	0	0	0	0
2-hydroxy-3-oxopropionate reductase (EC 1.1.1.60)	Glycerate metabolism	0	1	0	1	0	0	1	1	0	0	0	0	0	0	0	0	0	0	0	0	0	0	1	1	0	0	0	0	0	1	1	0	0	0
2-hydroxy-3-oxopropionate reductase (EC 1.1.1.60)	Glycerate metabolism	0	0	0	0	0	0	1	0	0	0	0	0	0	0	0	0	0	0	0	0	0	0	0	0	0	0	0	0	0	0	0	0	1	0
2-hydroxy-3-oxopropionate reductase (EC 1.1.1.60)	Glycerate metabolism	0	1	0	0	0	0	0	0	0	0	0	0	0	0	0	0	0	0	0	0	0	0	0	1	0	0	0	0	0	0	0	0	0	0
D-glycerate 2-kinase (EC 2.7.1.-)	Glycerate metabolism	0	0	0	0	1	0	0	0	0	0	0	1	0	0	0	0	0	0	0	0	0	0	0	0	0	0	0	0	0	0	0	0	0	0
D-glycerate transporter	0	0	0	0	1	0	1	0	0	0	1	0	0	0	0	1	1	0	0	0	0	0	0	1	1	0	1	0	1	0	0	0	0	0	2
Hydroxypyruvate isomerase (EC 5.3.1.22)	Glycerate metabolism	0	0	0	0	1	0	0	0	0	0	0	1	0	0	0	0	0	0	0	0	0	0	0	0	0	0	0	0	0	0	0	0	0	0
Hydroxypyruvate isomerase (EC 5.3.1.22)	Glycerate metabolism	0	0	0	0	0	0	0	0	0	0	0	0	0	0	1	0	0	0	0	0	0	0	0	1	0	1	0	1	0	0	0	0	0	0
Glycerol kinase (EC 2.7.1.30)	Glycerol and Glycerol-3-phosphate Uptake and Utilization	1	2	1	1	1	1	1	2	1	2	1	1	2	1	2	2	1	2	2	1	1	1	1	2	0	2	2	2	2	1	1	1	1	2
Glycerol-3-phosphate ABC transporter, ATP-binding protein UgpC (TC 3.A.1.1.3)	Glycerol and Glycerol-3-phosphate Uptake and Utilization	1	1	1	1	1	1	1	1	1	1	2	1	1	1	1	1	1	1	1	1	1	1	1	1	1	1	1	1	1	1	1	1	1	1
Glycerol-3-phosphate ABC transporter, ATP-binding protein UgpC (TC 3.A.1.1.3)	Glycerol and Glycerol-3-phosphate Uptake and Utilization	0	0	0	1	0	1	0	0	0	0	0	0	0	0	0	0	0	0	0	0	0	0	1	0	0	0	0	0	0	0	0	0	0	0
Glycerol-3-phosphate ABC transporter, permease protein UgpA (TC 3.A.1.1.3)	Glycerol and Glycerol-3-phosphate Uptake and Utilization	0	0	0	1	0	1	0	0	0	0	0	0	0	0	0	0	0	0	0	0	0	0	1	0	0	0	0	0	0	0	0	0	0	0
Glycerol-3-phosphate ABC transporter, permease protein UgpE (TC 3.A.1.1.3)	Glycerol and Glycerol-3-phosphate Uptake and Utilization	0	0	0	0	0	0	0	1	0	0	0	0	0	0	0	0	0	0	0	0	0	0	0	0	0	0	1	0	1	0	0	0	0	0
Glycerol-3-phosphate responsive antiterminator (mRNA-binding)	Glycerol and Glycerol-3-phosphate Uptake and Utilization	0	0	0	0	1	0	0	0	0	0	0	1	0	0	0	0	0	0	0	0	0	0	0	0	0	0	0	0	0	0	0	0	0	0
Glycerophosphoryl diester phosphodiesterase (EC 3.1.4.46)	Glycerol and Glycerol-3-phosphate Uptake and Utilization	1	1	0	1	0	1	1	1	0	1	0	0	1	1	1	1	0	1	1	1	1	1	1	1	1	1	1	1	1	1	0	1	0	1
Glycerophosphoryl diester phosphodiesterase (EC 3.1.4.46)	Glycerol and Glycerol-3-phosphate Uptake and Utilization	0	0	0	0	1	0	0	0	0	0	0	1	0	0	0	0	0	0	0	0	0	0	0	0	0	0	0	0	0	0	0	0	0	0
Glycerophosphoryl diester phosphodiesterase (EC 3.1.4.46)	Glycerol and Glycerol-3-phosphate Uptake and Utilization	1	1	1	1	0	1	1	1	1	1	0	0	2	1	2	2	0	1	1	1	1	1	1	2	1	2	1	2	1	1	1	1	1	2
Glycerophosphoryl diester phosphodiesterase (EC 3.1.4.46)	Glycerol and Glycerol-3-phosphate Uptake and Utilization	0	0	0	0	0	0	0	0	0	1	0	0	0	0	0	0	0	0	1	0	1	0	0	1	0	0	0	0	0	0	0	1	0	1
Glycerophosphoryl diester phosphodiesterase (EC 3.1.4.46)	Glycerol and Glycerol-3-phosphate Uptake and Utilization	0	0	0	0	0	0	0	0	0	0	0	0	0	1	0	0	0	0	0	0	1	1	0	0	0	0	0	0	0	0	0	1	0	0
Glycerophosphoryl diester phosphodiesterase (EC 3.1.4.46)	Glycerol and Glycerol-3-phosphate Uptake and Utilization	0	0	1	0	0	0	0	0	1	0	0	0	0	0	0	0	0	0	0	0	0	0	0	0	0	0	0	0	0	0	1	0	1	0
Glycerophosphoryl diester phosphodiesterase (EC 3.1.4.46)	Glycerol and Glycerol-3-phosphate Uptake and Utilization	0	0	0	1	0	1	0	0	0	0	0	0	0	0	0	0	0	0	0	0	0	0	1	0	0	0	0	0	0	0	0	0	0	0
Glycerophosphoryl diester phosphodiesterase (EC 3.1.4.46)	Glycerol and Glycerol-3-phosphate Uptake and Utilization	0	0	0	0	0	0	0	0	0	0	0	0	0	0	0	0	0	1	0	0	0	0	0	0	1	0	0	0	0	0	0	0	0	0
Glucose-1-phosphate adenylyltransferase (EC 2.7.7.27)	Glycogen metabolism	1	1	1	1	0	1	1	1	0	1	1	0	1	1	1	1	0	1	1	1	1	1	1	1	1	1	1	1	1	1	0	1	0	1
Glycogen phosphorylase (EC 2.4.1.1)	Glycogen metabolism	1	1	0	1	0	1	1	1	0	1	0	0	1	1	1	1	0	0	1	1	1	1	1	1	1	1	1	1	1	1	0	1	0	1
Predicted glycogen synthase, ADP-glucose transglucosylase (EC 2.4.1.21), Actinobacterial type	Glycogen metabolism	1	1	1	1	0	1	1	1	0	1	1	0	1	1	1	1	0	1	1	1	1	1	1	1	1	1	1	1	1	1	0	1	0	1
Glycolate dehydrogenase (EC 1.1.99.14), FAD-binding subunit GlcE	Glycolate, glyoxylate interconversions	0	0	0	0	1	0	0	0	0	0	0	1	0	0	0	0	0	0	0	0	0	0	0	0	0	0	0	0	0	0	0	0	0	0
Glycolate dehydrogenase (EC 1.1.99.14), iron-sulfur subunit GlcF	Glycolate, glyoxylate interconversions	0	0	0	0	1	0	0	0	0	0	0	1	0	0	0	0	0	0	0	0	0	0	0	0	0	0	0	0	0	0	0	0	0	0
Glycolate dehydrogenase (EC 1.1.99.14), subunit GlcD	Glycolate, glyoxylate interconversions	0	0	0	0	1	0	0	0	0	0	0	1	0	0	0	0	0	0	0	0	0	0	0	0	0	0	0	0	0	0	0	0	0	0
Glycolate dehydrogenase (EC 1.1.99.14), subunit GlcD	Glycolate, glyoxylate interconversions	0	0	0	0	1	0	0	0	0	0	0	1	0	0	0	0	0	0	0	0	0	0	0	0	0	0	0	0	0	0	0	0	0	0
Glycolate dehydrogenase (EC 1.1.99.14), subunit GlcD	Glycolate, glyoxylate interconversions	0	0	0	1	0	0	0	0	0	1	1	0	0	1	1	0	1	0	0	0	0	1	0	1	0	1	0	1	0	0	1	0	0	0
Glycolate dehydrogenase (EC 1.1.99.14), subunit GlcD	Glycolate, glyoxylate interconversions	0	0	0	0	0	0	0	0	0	0	0	0	0	1	1	0	0	0	0	0	0	1	0	1	0	0	0	1	0	1	0	0	0	0
Glycolate dehydrogenase (EC 1.1.99.14), subunit GlcD	Glycolate, glyoxylate interconversions	0	0	0	0	0	0	0	0	0	0	0	0	0	0	0	0	1	0	0	0	0	0	0	0	0	0	1	0	1	0	0	0	0	0
Glycolate dehydrogenase (EC 1.1.99.14), subunit GlcD	Glycolate, glyoxylate interconversions	0	0	0	0	0	0	0	0	0	0	0	0	0	1	0	0	0	0	0	0	0	1	0	0	0	0	0	0	0	0	0	0	0	0
Glycolate dehydrogenase (EC 1.1.99.14), subunit GlcD	Glycolate, glyoxylate interconversions	0	0	0	0	0	0	0	0	0	0	0	0	0	1	0	0	0	0	0	0	0	1	0	0	0	0	0	0	0	0	0	0	0	0
Glyoxylate reductase (EC 1.1.1.26)	Glycolate, glyoxylate interconversions	0	0	0	0	1	0	0	0	0	0	0	1	0	0	0	0	0	0	0	0	0	0	0	0	0	0	0	0	0	0	0	0	0	0
6-phosphofructokinase (EC 2.7.1.11)	Glycolysis and Gluconeogenesis	0	0	0	0	1	0	0	0	0	0	0	1	0	0	0	0	0	0	0	0	0	0	0	0	0	0	0	0	0	0	0	0	0	0
6-phosphofructokinase (EC 2.7.1.11)	Glycolysis and Gluconeogenesis	1	1	1	1	0	1	1	1	1	1	0	0	1	1	1	1	1	1	1	1	1	1	1	1	1	1	1	1	1	1	1	1	1	1
Enolase (EC 4.2.1.11)	Glycolysis and Gluconeogenesis	2	0	0	0	0	0	0	0	0	0	0	0	0	0	0	0	0	0	0	0	0	0	0	0	0	0	0	0	0	0	0	0	0	0
Enolase (EC 4.2.1.11)	Glycolysis and Gluconeogenesis	1	1	1	1	1	1	1	1	1	1	1	1	1	1	1	1	1	1	1	1	1	1	1	1	1	1	1	1	1	1	1	1	1	1
Fructose-1,6-bisphosphatase, GlpX type (EC 3.1.3.11)	Glycolysis and Gluconeogenesis	0	0	0	0	1	0	0	0	0	0	0	1	0	0	0	0	0	0	0	0	0	0	0	0	0	0	0	0	0	0	0	0	0	0
Fructose-1,6-bisphosphatase, GlpX type (EC 3.1.3.11)	Glycolysis and Gluconeogenesis	0	0	0	0	0	0	0	0	0	0	0	0	0	0	0	0	0	0	1	0	1	0	0	0	0	0	1	0	1	0	0	1	0	0
Fructose-1,6-bisphosphatase, GlpX type (EC 3.1.3.11)	Glycolysis and Gluconeogenesis	1	1	1	1	0	1	1	1	1	1	1	0	1	1	1	1	1	1	1	1	1	1	1	1	1	1	1	1	1	1	1	1	1	1
Fructose-1,6-bisphosphatase, GlpX type (EC 3.1.3.11)	Glycolysis and Gluconeogenesis	0	0	0	0	0	0	0	0	0	0	0	0	0	0	0	0	0	1	0	0	0	0	0	0	1	0	0	0	0	0	0	0	0	0
Fructose-bisphosphate aldolase class I (EC 4.1.2.13)	Glycolysis and Gluconeogenesis	0	0	0	0	1	0	0	0	0	0	0	1	0	0	0	0	0	0	0	0	0	0	0	0	0	0	0	0	0	0	0	0	0	0
Fructose-bisphosphate aldolase class II (EC 4.1.2.13)	Glycolysis and Gluconeogenesis	0	0	0	0	0	0	0	0	1	0	0	0	0	0	0	0	0	0	0	0	0	0	0	0	0	0	0	0	0	0	0	0	1	0
Fructose-bisphosphate aldolase class II (EC 4.1.2.13)	Glycolysis and Gluconeogenesis	0	1	0	1	0	0	0	1	0	1	0	1	0	0	1	1	0	0	0	0	0	0	1	1	0	1	0	1	0	0	0	0	0	1
Fructose-bisphosphate aldolase class II (EC 4.1.2.13)	Glycolysis and Gluconeogenesis	1	1	1	1	0	1	1	1	1	1	1	0	1	1	1	1	0	1	1	1	1	1	1	1	1	1	1	1	1	1	1	1	1	1
Glucokinase (EC 2.7.1.2)	Glycolysis and Gluconeogenesis	1	1	0	1	0	1	0	1	0	1	0	0	1	1	1	1	0	1	1	0	1	1	1	1	1	1	1	1	1	1	0	1	0	1
Glucose-6-phosphate isomerase (EC 5.3.1.9)	Glycolysis and Gluconeogenesis	1	1	1	2	0	1	1	1	0	1	1	0	1	1	1	2	1	1	1	1	1	1	2	1	1	1	1	1	1	1	1	1	0	1
Glucose-6-phosphate isomerase (EC 5.3.1.9)	Glycolysis and Gluconeogenesis	1	0	1	0	0	0	0	0	1	0	0	0	0	0	0	0	0	0	0	0	0	0	0	0	0	0	1	0	1	0	0	0	1	0
NADPH-dependent glyceraldehyde-3-phosphate dehydrogenase (EC 1.2.1.13)	Glycolysis and Gluconeogenesis	0	1	1	1	0	1	1	1	1	1	1	0	2	1	1	1	0	1	1	1	1	1	2	1	1	2	0	1	0	1	1	1	1	2
Phosphoenolpyruvate synthase (EC 2.7.9.2)	Glycolysis and Gluconeogenesis	0	0	1	0	1	0	0	0	0	0	0	0	0	1	0	0	1	0	2	0	2	1	0	0	0	0	1	0	1	1	0	2	0	0
Phosphoglycerate kinase (EC 2.7.2.3)	Glycolysis and Gluconeogenesis	1	1	1	1	1	1	1	1	1	1	1	1	1	1	1	1	1	1	1	1	1	1	1	1	1	1	1	1	1	1	1	1	1	1
Putative phosphoenolpyruvate synthase/pyruvate phosphate dikinase, C-terminal domain	Glycolysis and Gluconeogenesis	0	0	0	1	0	0	0	1	0	0	0	0	1	1	1	0	0	0	0	0	0	1	1	1	0	0	0	1	0	1	0	0	0	0
Putative phosphoenolpyruvate synthase/pyruvate phosphate dikinase, N-terminal domain	Glycolysis and Gluconeogenesis	0	0	0	1	0	0	0	1	0	0	0	0	1	1	1	0	0	0	0	0	0	1	1	1	0	0	0	1	0	1	0	0	0	0
Putative phosphoenolpyruvate synthase/pyruvate phosphate dikinase, N-terminal domain	Glycolysis and Gluconeogenesis	0	0	0	1	0	0	0	0	0	0	0	0	1	0	0	0	0	0	0	0	0	0	1	0	0	0	0	0	0	0	0	0	0	0
Pyruvate kinase (EC 2.7.1.40)	Glycolysis and Gluconeogenesis	0	0	0	0	1	0	0	0	0	0	0	1	0	0	0	0	0	0	0	0	0	0	0	0	0	0	0	0	0	0	0	0	0	0
Pyruvate kinase (EC 2.7.1.40)	Glycolysis and Gluconeogenesis	1	1	1	1	0	1	1	1	1	1	1	0	1	1	1	1	1	1	1	1	1	1	1	1	1	1	1	1	1	1	1	1	1	1
Triosephosphate isomerase (EC 5.3.1.1)	Glycolysis and Gluconeogenesis	0	0	0	0	1	0	0	0	0	0	0	1	0	0	0	0	0	0	0	0	0	0	0	0	0	0	0	0	0	0	0	0	0	0
Triosephosphate isomerase (EC 5.3.1.1)	Glycolysis and Gluconeogenesis	1	1	1	1	0	1	1	1	1	1	1	0	1	1	1	1	1	1	1	1	1	1	1	1	1	1	1	1	1	1	1	1	1	1
Triosephosphate isomerase (EC 5.3.1.1)	Glycolysis and Gluconeogenesis	1	0	0	1	0	1	0	0	1	0	0	0	0	0	0	0	0	0	0	0	0	0	1	0	0	0	0	0	0	0	0	0	0	0
Triosephosphate isomerase (EC 5.3.1.1)	Glycolysis and Gluconeogenesis	0	0	0	0	0	0	0	0	0	0	0	0	0	1	0	0	0	0	0	0	0	1	0	0	0	0	0	0	0	0	0	0	0	0
Aconitate hydratase (EC 4.2.1.3)	Glyoxylate bypass	0	1	0	2	0	1	0	1	0	1	0	0	0	1	1	1	0	0	1	0	1	1	2	1	0	1	0	1	0	0	0	1	0	1
Aconitate hydratase (EC 4.2.1.3)	Glyoxylate bypass	0	0	0	0	0	0	0	0	0	0	0	0	0	0	0	1	0	0	0	0	0	0	0	0	0	0	0	0	0	0	0	0	0	1
Citrate synthase (EC 2.3.3.1)	0	1	1	1	1	1	1	1	1	1	1	1	1	1	1	1	1	1	1	1	1	1	1	1	1	1	1	1	1	1	1	1	1	1	1
Isocitrate lyase (EC 4.1.3.1)	Glyoxylate bypass	0	1	0	1	0	1	0	1	0	1	0	0	1	1	1	1	0	0	1	0	1	1	1	1	0	1	0	1	0	1	1	1	0	1
Isocitrate lyase (EC 4.1.3.1)	Glyoxylate bypass	0	0	1	0	1	0	1	0	1	0	1	1	0	0	0	0	1	1	0	1	0	0	0	0	1	0	1	0	1	0	0	0	0	0
Isocitrate lyase (EC 4.1.3.1)	Glyoxylate bypass	0	0	1	0	0	0	0	0	1	0	0	0	0	0	0	0	0	0	0	0	0	0	0	0	0	0	0	0	0	0	0	0	1	0
Malate dehydrogenase (EC 1.1.1.37)	Glyoxylate bypass	0	0	0	1	0	0	0	0	0	0	0	0	0	0	0	0	0	0	0	0	0	0	1	0	0	0	0	0	0	0	0	0	0	0
Malate dehydrogenase (EC 1.1.1.37)	Glyoxylate bypass	1	0	0	0	1	0	1	0	0	1	0	0	1	1	1	1	0	1	1	0	1	1	0	1	1	1	1	1	1	1	1	1	0	1
Malate synthase (EC 2.3.3.9)	Glyoxylate bypass	0	1	1	1	1	2	1	1	1	1	1	1	1	1	1	1	1	2	1	1	1	1	1	1	2	1	1	1	1	2	1	1	0	1
Malate synthase (EC 2.3.3.9)	Glyoxylate bypass	0	0	0	0	0	0	0	0	0	0	0	0	0	1	0	0	0	0	1	0	1	1	0	0	0	0	0	0	0	0	0	1	0	0
5-deoxy-glucuronate isomerase (EC 5.3.1.-)	Inositol catabolism	1	1	0	1	0	1	0	0	0	0	0	0	0	1	1	1	0	0	0	0	0	1	1	1	1	1	0	1	0	1	0	0	0	1
5-keto-2-deoxy-D-gluconate-6 phosphate aldolase (EC 4.1.2.29)	0	0	0	0	0	0	1	0	0	0	0	0	0	0	0	0	1	0	0	0	0	0	0	0	0	0	0	0	0	0	0	0	0	0	0
5-keto-2-deoxy-D-gluconate-6 phosphate aldolase (EC 4.1.2.29)	0	1	1	0	1	0	1	0	0	0	0	0	0	0	1	1	1	0	0	0	0	0	1	1	1	0	1	0	1	0	1	0	0	0	1
5-keto-2-deoxygluconokinase (EC 2.7.1.92)	Inositol catabolism	1	1	0	1	0	1	0	0	0	0	0	0	0	1	1	1	0	0	0	0	0	1	1	1	0	1	0	1	0	1	0	0	0	1
Epi-inositol hydrolase (EC 3.7.1.-)	Inositol catabolism	1	1	0	1	1	1	0	0	0	0	0	0	0	1	1	1	0	0	0	0	0	1	1	1	1	1	0	1	0	2	0	0	0	1
Epi-inositol hydrolase (EC 3.7.1.-)	Inositol catabolism	0	0	0	0	0	0	0	0	0	0	0	0	0	1	0	0	0	0	0	0	0	1	0	0	0	0	0	0	0	0	0	0	0	0
Glyceraldehyde-3-phosphate ketol-isomerase (EC 5.3.1.1)	Inositol catabolism	0	1	0	1	0	1	0	0	0	0	0	0	0	0	0	1	0	0	0	0	0	0	1	0	0	0	0	0	0	1	0	0	0	0
Inositol transport system ATP-binding protein	Inositol catabolism	0	0	0	0	0	1	0	0	0	0	0	0	0	1	0	1	0	0	0	0	0	1	0	0	0	0	0	0	0	0	0	0	0	0
Inositol transport system ATP-binding protein	Inositol catabolism	0	1	0	1	0	0	0	0	0	0	0	0	0	0	0	0	0	0	0	0	0	0	1	0	0	0	0	0	0	1	0	0	0	0
Inositol transport system permease protein	Inositol catabolism	0	0	0	0	0	1	0	0	0	1	0	0	1	0	1	1	0	0	0	0	0	0	0	1	0	1	0	1	0	0	0	0	0	1
Inositol transport system permease protein	Inositol catabolism	0	0	0	0	0	0	0	0	0	0	0	0	0	1	0	0	0	0	0	0	0	1	0	0	0	0	0	0	0	0	0	0	0	0
Inositol transport system sugar-binding protein	Inositol catabolism	0	0	0	0	2	0	0	0	0	0	0	0	0	0	0	0	0	0	0	0	0	0	0	0	0	0	0	0	0	0	0	0	0	0
Inositol transport system sugar-binding protein	Inositol catabolism	0	0	0	0	0	0	0	0	0	0	0	0	0	0	1	0	0	0	0	0	0	0	0	1	1	0	0	1	0	0	0	0	0	0
Inositol transport system sugar-binding protein	Inositol catabolism	0	0	0	0	0	0	0	0	0	0	0	0	0	0	1	0	0	0	0	0	0	0	0	1	0	0	0	1	0	0	0	0	0	0
Inositol transport system sugar-binding protein	Inositol catabolism	0	0	0	0	0	0	0	0	0	0	0	0	0	1	0	0	0	0	0	0	0	1	0	0	0	0	0	0	0	1	0	0	0	0
Inosose dehydratase (EC 4.2.1.44)	Inositol catabolism	0	0	0	0	0	0	0	0	0	0	0	0	0	1	1	0	0	0	0	0	0	1	0	1	0	1	0	1	0	1	0	0	0	1
Inosose dehydratase (EC 4.2.1.44)	Inositol catabolism	1	1	0	1	0	1	0	0	1	0	0	0	0	0	0	1	0	0	0	0	0	0	1	0	0	0	0	0	0	1	0	0	0	0
Inosose dehydratase (EC 4.2.1.44)	Inositol catabolism	0	0	0	0	0	0	0	0	0	0	0	0	0	1	0	0	0	0	0	0	0	1	0	0	0	0	0	0	0	0	0	0	0	0
Inosose dehydratase (EC 4.2.1.44)	Inositol catabolism	0	0	0	0	0	0	0	0	0	0	0	0	0	0	0	0	0	0	0	0	0	0	0	0	0	0	0	0	0	1	0	1	0	0
Inosose isomerase (EC 5.3.99.-)	Inositol catabolism	0	1	0	1	0	1	0	0	0	0	0	0	0	0	0	1	0	0	0	0	0	0	1	0	0	0	0	0	0	1	0	0	0	0
Myo-inositol 2-dehydrogenase (EC 1.1.1.18)	Inositol catabolism	1	1	0	1	0	1	0	0	1	0	0	0	0	0	0	1	0	0	0	0	0	0	1	0	0	0	0	0	0	1	0	0	0	0
Myo-inositol 2-dehydrogenase (EC 1.1.1.18)	Inositol catabolism	0	0	0	0	0	0	0	0	0	0	0	0	0	1	1	0	0	0	0	0	0	1	0	1	0	1	0	1	0	0	0	0	0	1
Myo-inositol 2-dehydrogenase (EC 1.1.1.18)	Inositol catabolism	0	0	0	0	0	1	0	0	0	0	0	0	0	1	0	0	0	0	0	0	0	1	0	0	0	0	0	0	0	1	0	0	0	0
Myo-inositol 2-dehydrogenase (EC 1.1.1.18)	Inositol catabolism	0	0	0	0	0	0	0	0	0	0	0	0	0	0	0	0	0	0	0	0	0	0	0	0	1	0	0	0	0	1	0	0	0	0
Myo-inositol 2-dehydrogenase (EC 1.1.1.18)	Inositol catabolism	0	0	0	0	0	0	0	0	0	0	0	0	0	0	0	0	0	0	0	0	0	0	0	0	0	0	0	0	0	1	0	1	0	0
Myo-inositol 2-dehydrogenase (EC 1.1.1.18)	Inositol catabolism	1	0	0	0	0	0	0	0	0	0	0	0	0	0	0	0	0	0	0	0	0	0	0	0	0	0	0	0	0	1	0	0	0	0
Myo-inositol 2-dehydrogenase (EC 1.1.1.18)	Inositol catabolism	1	0	0	1	0	0	0	0	1	0	0	0	0	0	0	1	0	0	0	0	0	0	1	0	0	0	0	0	0	0	0	0	0	0
Lactate-responsive regulator LldR in Actinobacteria, GntR family	Lactate utilization	1	1	1	1	0	1	0	1	1	1	0	0	1	1	1	1	0	1	1	0	1	1	1	1	1	1	1	1	1	1	0	1	1	1
Lactate-responsive regulator LldR in Actinobacteria, GntR family	Lactate utilization	0	0	0	0	0	0	1	0	0	0	0	0	0	0	0	0	1	0	0	0	0	0	0	0	0	0	0	0	0	0	0	0	0	0
L-lactate permease	Lactate utilization	0	0	0	0	1	0	0	0	0	0	0	1	0	0	0	0	0	0	0	0	0	0	0	0	0	0	0	0	0	0	0	0	0	0
L-lactate permease	Lactate utilization	0	0	0	1	0	0	0	0	0	0	0	0	0	1	0	2	1	0	1	0	1	1	1	0	0	1	0	0	0	0	0	1	0	1
L-lactate permease	Lactate utilization	0	1	0	1	0	0	0	1	0	0	0	1	0	1	0	1	0	0	0	0	0	1	1	0	0	1	0	0	0	1	0	0	0	0
L-lactate permease	Lactate utilization	0	0	0	0	0	0	0	0	0	0	0	0	0	1	0	0	0	0	0	0	0	1	0	0	0	0	0	0	0	0	0	0	0	0
Predicted D-lactate dehydrogenase, Fe-S protein, FAD/FMN-containing	Lactate utilization	1	1	0	2	0	1	0	1	0	0	0	0	0	1	0	1	0	0	1	0	1	1	1	0	1	1	0	0	0	1	0	1	0	1
Predicted D-lactate dehydrogenase, Fe-S protein, FAD/FMN-containing	Lactate utilization	0	1	0	1	0	0	0	1	1	0	0	0	0	1	0	1	0	0	0	0	0	1	1	0	0	1	0	0	0	1	0	0	0	1
Predicted L-lactate dehydrogenase, Fe-S oxidoreductase subunit YkgE	Lactate utilization	0	0	0	0	0	0	0	0	0	0	0	1	0	0	0	0	1	0	0	0	0	0	0	0	0	0	0	0	0	0	0	0	0	0
Predicted L-lactate dehydrogenase, Iron-sulfur cluster-binding subunit YkgF	Lactate utilization	0	0	0	0	0	0	0	0	0	0	0	1	0	0	0	0	1	0	0	0	0	0	0	0	0	0	0	0	0	0	0	0	0	0
Galactokinase (EC 2.7.1.6)	Lactose and Galactose Uptake and Utilization	1	1	1	1	0	1	0	1	1	1	0	0	0	1	1	1	0	1	1	1	1	1	1	1	1	1	1	1	1	1	0	1	1	1
Galactose-1-phosphate uridylyltransferase (EC 2.7.7.10)	Lactose and Galactose Uptake and Utilization	1	1	1	1	0	1	0	1	1	1	0	0	0	1	1	1	0	1	1	1	1	1	1	1	1	1	1	1	1	1	0	1	1	1
Tagatose-6-phosphate kinase (EC 2.7.1.144)	Lactose and Galactose Uptake and Utilization	0	0	1	0	0	0	0	0	0	0	0	0	0	1	0	0	0	0	1	0	1	1	0	0	0	0	1	0	1	0	0	1	0	0
Galactoside O-acetyltransferase (EC 2.3.1.18)	Lactose utilization	0	1	0	1	0	0	0	0	0	0	0	0	0	0	1	0	0	0	0	0	0	0	1	0	0	0	1	0	0	0	0	0	0	0
Galactoside O-acetyltransferase (EC 2.3.1.18)	Lactose utilization	0	0	0	0	0	0	0	0	0	0	0	0	0	0	0	0	0	0	1	0	0	0	0	0	0	0	1	0	1	0	0	0	0	0
Alpha-N-arabinofuranosidase (EC 3.2.1.55)	L-Arabinose utilization	2	0	0	0	0	0	0	0	0	0	0	0	0	0	0	2	0	1	1	0	1	0	0	0	1	0	2	0	2	0	0	1	1	2
Alpha-N-arabinofuranosidase (EC 3.2.1.55)	L-Arabinose utilization	0	0	0	0	0	0	0	0	1	0	0	0	0	0	0	0	0	0	0	0	0	0	0	0	0	0	0	0	1	0	0	0	0	0
Arabinose operon protein AraL	L-Arabinose utilization	0	1	0	1	0	0	0	1	0	1	0	1	0	0	1	1	0	0	0	0	0	0	1	1	0	1	0	1	0	0	0	0	0	1
L-arabinose isomerase (EC 5.3.1.4)	L-Arabinose utilization	1	1	0	1	0	1	0	1	1	0	0	0	0	1	1	0	0	1	0	0	1	1	1	1	1	0	2	1	2	1	0	1	1	1
L-arabinose isomerase (EC 5.3.1.4)	L-Arabinose utilization	0	1	0	1	0	0	0	1	0	0	0	0	0	0	0	1	0	0	0	0	0	0	1	0	0	0	0	0	0	1	0	0	0	0
L-arabinose transport ATP-binding protein AraG (TC 3.A.1.2.2)	L-Arabinose utilization	0	0	0	0	0	0	0	0	0	0	0	0	0	0	0	0	0	0	0	0	0	0	0	0	1	0	0	0	0	0	1	0	0	0
L-arabinose transport ATP-binding protein AraG (TC 3.A.1.2.2)	L-Arabinose utilization	0	0	0	0	0	0	0	0	0	0	0	0	0	1	0	0	0	0	0	0	0	1	0	0	0	0	0	0	0	0	0	0	0	0
L-arabinose transport system permease protein (TC 3.A.1.2.2)	L-Arabinose utilization	0	1	0	1	0	1	0	1	1	0	0	0	0	1	1	1	0	0	0	0	0	1	1	1	1	0	1	1	1	1	0	0	1	1
L-arabinose transport system permease protein (TC 3.A.1.2.2)	L-Arabinose utilization	0	0	0	0	0	0	0	0	0	0	0	0	0	0	0	1	0	0	1	0	0	0	0	0	0	0	1	0	1	0	0	0	0	0
L-arabinose-binding periplasmic protein precursor AraF (TC 3.A.1.2.2)	L-Arabinose utilization	0	1	0	1	0	1	0	1	1	0	0	0	0	1	1	1	0	0	0	0	0	1	1	1	1	0	1	1	1	1	0	0	1	1
L-arabinose-binding periplasmic protein precursor AraF (TC 3.A.1.2.2)	L-Arabinose utilization	1	0	0	0	0	0	0	0	0	0	0	0	0	1	0	0	0	0	0	1	0	1	0	0	0	0	1	0	1	1	0	0	0	0
L-arabinose-binding periplasmic protein precursor AraF (TC 3.A.1.2.2)	L-Arabinose utilization	0	0	0	0	0	0	0	0	0	0	0	0	0	0	0	1	0	0	1	0	0	0	0	0	0	0	1	0	1	0	0	0	0	0
Ribulokinase (EC 2.7.1.16)	L-Arabinose utilization	0	1	0	1	0	1	0	1	0	0	0	0	0	1	1	2	0	0	0	0	1	1	1	1	0	0	0	1	1	2	0	1	0	1
2-keto-3-deoxy-L-fuconate dehydrogenase	L-fucose utilization temp	1	0	1	2	0	0	1	0	1	1	0	0	0	0	0	0	0	1	0	0	0	0	1	0	1	0	0	0	0	0	0	0	0	0
Alpha-L-fucosidase (EC 3.2.1.51)	L-fucose utilization temp	2	0	0	0	0	0	0	0	0	0	0	0	0	0	0	0	0	0	0	0	0	0	0	0	1	0	0	0	0	0	0	0	0	0
L-fuco-beta-pyranose dehydrogenase (EC 1.1.1.122)	L-fucose utilization temp	0	1	0	1	0	1	1	1	0	1	0	0	1	1	1	1	0	0	1	1	1	1	1	1	1	1	1	1	1	1	0	1	0	1
L-fuco-beta-pyranose dehydrogenase (EC 1.1.1.122)	L-fucose utilization temp	1	0	1	0	0	0	1	0	1	1	0	0	0	0	0	0	0	1	0	0	0	0	0	0	1	0	0	0	0	0	0	0	0	0
L-fuco-beta-pyranose dehydrogenase (EC 1.1.1.122)	L-fucose utilization temp	1	0	0	0	0	0	1	0	1	0	0	0	0	0	0	0	0	0	0	0	0	0	0	0	0	0	0	0	0	0	1	0	1	0
L-fuconolactone hydrolase	L-fucose utilization temp	1	1	1	1	0	1	1	1	1	1	1	0	1	1	1	1	1	1	1	1	1	1	1	1	1	1	1	1	1	1	1	1	1	1
L-fuconolactone hydrolase	L-fucose utilization temp	0	0	0	0	0	0	0	0	0	1	0	0	0	0	0	0	0	1	0	0	0	0	0	0	1	0	0	0	0	0	0	0	0	0
Alfa-L-rhamnosidase (EC 3.2.1.40)	L-rhamnose utilization	2	0	0	0	0	0	0	0	2	0	0	0	0	0	0	0	0	0	0	0	0	0	0	0	2	0	1	0	0	0	0	0	1	0
Predicted rhamnose oligosaccharide ABC transport system, permease component	L-rhamnose utilization	1	0	0	0	0	0	0	0	1	0	0	0	0	0	0	0	0	0	0	0	0	0	0	0	0	0	0	0	0	0	0	0	0	0
Predicted rhamnose oligosaccharide ABC transport system, permease component	0	1	0	0	0	0	0	0	0	1	0	0	0	0	0	0	0	0	0	0	0	0	0	0	0	0	0	0	0	0	0	0	0	0	0
Transcriptional regulator of rhamnose utilization, DeoR family	L-rhamnose utilization	0	0	0	0	0	0	0	0	0	0	0	0	0	0	0	0	0	0	0	0	0	0	0	0	1	0	1	0	1	0	0	0	0	0
Transcriptional regulator of rhamnose utilization, LacI family	L-rhamnose utilization	0	0	0	0	0	0	0	0	1	0	0	0	0	0	0	0	0	0	0	0	0	0	0	0	1	0	1	0	0	0	0	0	0	0
4-alpha-glucanotransferase (amylomaltase) (EC 2.4.1.25)	Maltose and Maltodextrin Utilization	0	0	0	0	0	0	0	0	0	0	0	0	0	1	0	0	0	0	1	0	1	1	0	0	0	0	0	0	0	1	0	1	0	0
Alpha-glucosidase (EC 3.2.1.20)	Maltose and Maltodextrin Utilization	0	0	0	0	1	0	0	0	0	0	0	1	0	0	0	0	0	0	0	0	0	0	0	0	0	0	0	0	0	0	0	0	0	0
Beta-phosphoglucomutase (EC 5.4.2.6)	Trehalose Uptake and Utilization	0	0	0	0	1	0	0	0	0	0	0	1	0	0	0	0	0	0	0	0	0	0	0	0	0	0	0	0	0	0	0	0	0	0
Beta-phosphoglucomutase (EC 5.4.2.6)	Trehalose Uptake and Utilization	0	1	0	1	0	2	0	0	0	0	0	0	0	0	0	0	0	0	0	0	0	0	1	0	0	0	0	0	0	0	0	0	0	1
Beta-phosphoglucomutase (EC 5.4.2.6)	Trehalose Uptake and Utilization	0	0	0	0	0	0	0	0	0	0	0	0	0	1	0	0	0	0	0	0	0	1	0	0	0	0	0	0	0	0	0	0	0	0
Inner membrane ABC transporter permease protein YcjP	Maltose and Maltodextrin Utilization	1	0	0	0	0	0	0	0	0	0	0	0	0	0	0	0	0	0	0	0	0	0	0	0	1	0	0	0	0	0	0	0	1	0
Maltose/maltodextrin ABC transporter, permease protein MalF	Maltose and Maltodextrin Utilization	1	0	0	0	0	0	0	0	0	0	0	0	0	0	0	0	0	0	0	0	0	0	0	0	0	0	0	0	0	0	0	0	1	0
Maltose/maltodextrin ABC transporter, permease protein MalF	Maltose and Maltodextrin Utilization	0	0	0	0	1	0	0	0	0	0	0	1	0	0	0	0	0	0	0	0	0	0	0	0	0	0	0	0	0	0	0	0	0	0
Maltose/maltodextrin ABC transporter, permease protein MalF	Maltose and Maltodextrin Utilization	0	0	0	0	0	0	0	0	0	0	0	0	0	1	0	0	0	0	0	0	0	1	0	0	0	0	0	0	0	0	0	0	0	0
Maltose/maltodextrin ABC transporter, permease protein MalG	Maltose and Maltodextrin Utilization	0	0	0	1	0	0	0	0	0	0	0	0	0	1	1	0	0	0	0	0	0	1	1	1	0	0	0	1	0	1	0	0	0	0
Maltose/maltodextrin ABC transporter, permease protein MalG	Maltose and Maltodextrin Utilization	0	0	0	0	1	0	0	0	0	1	1	1	0	0	0	0	0	0	0	0	0	0	0	0	0	0	1	0	0	0	0	0	0	0
Mlc, transcriptional repressor of MalT and manXYZ operon	0	1	0	0	0	0	0	0	0	0	0	0	0	0	0	0	0	0	0	0	1	0	0	0	0	0	0	1	0	1	0	0	0	0	0
Oligo-1,6-glucosidase (EC 3.2.1.10)	Maltose and Maltodextrin Utilization	0	1	0	0	0	0	0	0	0	0	0	0	0	0	0	0	0	0	1	0	1	0	0	0	1	0	1	0	1	0	0	1	0	0
Transcriptional activator of maltose regulon, MalT	Maltose and Maltodextrin Utilization	0	0	0	0	0	0	0	0	0	0	0	1	1	1	0	0	0	0	0	0	0	1	0	0	0	0	1	0	1	0	0	0	0	0
Fructokinase (EC 2.7.1.4)	Mannitol Utilization	0	1	1	1	0	1	0	1	0	1	0	0	1	0	1	1	0	0	1	0	1	0	1	1	1	1	0	1	0	0	0	1	0	1
Fructokinase (EC 2.7.1.4)	Mannitol Utilization	0	0	0	0	0	0	0	0	0	0	0	0	0	0	0	0	0	0	0	0	0	0	0	0	0	0	1	0	1	0	0	0	0	0
Fructokinase (EC 2.7.1.4)	Mannitol Utilization	0	0	0	0	0	0	0	0	0	0	0	0	0	0	0	0	0	0	0	0	0	0	0	0	0	0	1	0	1	0	0	0	0	0
Mannitol-1-phosphate 5-dehydrogenase (EC 1.1.1.17)	Mannitol Utilization	0	0	1	0	0	1	1	0	1	1	1	0	1	1	1	1	0	0	1	0	1	1	0	1	1	1	1	1	1	1	0	1	1	1
Phosphoenolpyruvate-protein phosphotransferase of PTS system (EC 2.7.3.9)	Mannitol Utilization	0	0	0	0	0	1	0	0	0	0	0	0	0	0	0	0	0	0	0	0	0	0	0	0	0	1	0	0	0	0	0	0	0	0
Phosphoenolpyruvate-protein phosphotransferase of PTS system (EC 2.7.3.9)	Mannitol Utilization	0	0	0	0	1	0	0	0	0	0	0	1	0	0	0	0	0	0	0	0	0	0	0	0	0	0	0	0	0	0	0	0	0	0
Phosphoenolpyruvate-protein phosphotransferase of PTS system (EC 2.7.3.9)	Mannitol Utilization	0	1	0	1	0	1	0	1	0	1	0	0	1	1	1	1	0	0	2	0	2	1	1	1	0	1	1	1	1	1	1	2	0	1
Phosphoenolpyruvate-protein phosphotransferase of PTS system (EC 2.7.3.9)	Mannitol Utilization	1	0	1	0	0	2	1	0	1	1	1	0	0	1	0	1	0	1	0	2	0	1	0	0	1	1	1	0	1	1	0	0	1	1
Phosphotransferase system, phosphocarrier protein HPr	Mannitol Utilization	0	0	0	0	1	0	0	0	0	0	0	1	0	0	0	0	0	0	0	0	0	0	0	0	0	0	0	0	0	0	0	0	0	0
PTS system, mannitol-specific IIA component (EC 2.7.1.69)	Mannitol Utilization	0	0	1	0	0	1	1	0	0	1	1	1	1	1	0	1	0	0	1	0	1	1	0	0	1	1	1	0	1	1	0	1	0	1
PTS system, mannitol-specific IIC component (EC 2.7.1.69)	Mannitol Utilization	0	0	1	0	0	1	1	0	1	1	1	1	1	1	0	1	0	0	1	0	1	1	0	0	1	1	1	0	1	1	0	1	1	1
Alpha-1,2-mannosidase	Mannose Metabolism	0	0	0	0	0	0	0	0	1	0	0	0	0	0	0	0	0	0	0	0	0	0	0	0	1	0	0	0	0	0	0	0	0	0
Alpha-1,2-mannosidase	Mannose Metabolism	0	0	0	0	0	0	0	0	0	0	0	0	0	0	0	0	0	0	0	0	0	0	0	0	0	0	0	0	0	1	0	0	1	0
Alpha-mannosidase (EC 3.2.1.24)	Mannose Metabolism	2	1	1	1	0	1	0	1	0	1	0	0	2	2	1	1	0	1	1	0	2	2	1	1	1	1	1	1	1	1	0	2	2	1
Alpha-mannosidase (EC 3.2.1.24)	Mannose Metabolism	0	0	0	0	0	0	0	0	0	0	0	0	0	1	0	0	0	0	0	0	0	1	0	0	0	0	0	0	0	0	0	0	0	0
Beta-mannosidase (EC 3.2.1.25)	Mannose Metabolism	1	0	0	0	0	0	0	0	0	0	0	0	0	0	0	0	0	0	0	0	0	0	0	0	0	0	1	0	1	1	0	0	0	0
Mannose-1-phosphate guanylyltransferase (EC 2.7.7.13 )	Mannose Metabolism	0	0	0	0	1	0	0	0	0	0	0	1	0	0	0	0	0	0	0	0	0	0	0	0	0	0	0	0	0	0	0	0	0	0
Mannose-1-phosphate guanylyltransferase (EC 2.7.7.22)	0	1	1	1	1	0	1	1	1	1	1	1	0	1	1	1	1	1	1	1	1	1	1	1	1	1	1	1	1	1	1	1	1	1	1
Mannose-6-phosphate isomerase (EC 5.3.1.8)	Mannose Metabolism	0	0	0	0	0	0	0	0	1	0	0	0	0	0	0	0	0	0	0	0	0	0	0	0	0	0	0	0	0	0	0	0	1	0
Mannose-6-phosphate isomerase (EC 5.3.1.8)	Mannose Metabolism	0	0	0	0	1	0	0	0	0	0	0	1	0	0	0	0	0	0	0	0	0	0	0	0	0	0	0	0	0	0	0	0	0	0
Mannose-6-phosphate isomerase (EC 5.3.1.8)	Mannose Metabolism	1	1	0	1	0	1	0	1	0	1	0	0	1	1	1	1	0	1	1	1	1	1	1	1	1	1	1	1	1	1	0	1	0	1
Mannose-6-phosphate isomerase (EC 5.3.1.8)	Mannose Metabolism	0	0	0	0	0	0	1	0	0	0	1	0	1	0	0	0	0	0	0	0	0	0	0	0	0	0	0	1	0	0	0	0	0	0
Mannose-6-phosphate isomerase (EC 5.3.1.8)	Mannose Metabolism	1	1	1	1	0	1	1	1	1	1	0	0	1	1	1	1	1	1	1	1	1	1	1	1	1	1	1	1	1	1	1	1	1	1
Mannose-6-phosphate isomerase (EC 5.3.1.8)	Mannose Metabolism	0	1	0	0	0	0	0	1	0	0	0	0	0	0	0	0	0	0	0	0	0	0	0	0	0	0	0	0	0	0	0	0	1	0
Mannose-6-phosphate isomerase (EC 5.3.1.8)	Mannose Metabolism	0	0	0	0	0	0	0	0	0	0	0	0	0	0	0	0	0	0	1	0	1	0	0	0	0	0	0	0	0	0	0	1	0	0
Phosphomannomutase (EC 5.4.2.8)	Mannose Metabolism	0	0	0	0	1	0	0	0	0	0	0	1	0	0	0	0	0	0	0	0	0	0	0	0	0	0	0	0	0	0	0	0	0	0
Phosphomannomutase (EC 5.4.2.8)	Mannose Metabolism	0	0	0	0	1	0	0	0	0	0	0	1	0	0	0	0	0	0	0	0	0	0	0	0	0	0	0	0	0	0	0	0	0	0
Phosphomannomutase (EC 5.4.2.8)	Mannose Metabolism	0	0	0	0	1	0	0	0	0	0	0	1	0	0	0	0	0	0	0	0	0	0	0	0	0	0	0	0	0	0	0	0	0	0
Phosphomannomutase (EC 5.4.2.8)	Mannose Metabolism	0	0	0	0	0	0	1	0	0	0	1	0	0	0	0	0	0	1	1	1	1	0	0	0	1	0	0	0	0	0	0	1	0	0
Phosphomannomutase (EC 5.4.2.8)	Mannose Metabolism	1	1	1	1	0	1	1	1	1	1	1	0	1	1	1	1	1	1	1	1	1	1	1	1	1	1	1	1	1	1	1	1	1	1
2-methylcitrate dehydratase (EC 4.2.1.79)	Methylcitrate cycle	1	1	1	1	0	1	1	1	1	1	1	0	1	2	1	1	1	1	1	1	1	2	1	1	1	1	1	1	1	2	1	1	0	1
2-methylcitrate dehydratase (EC 4.2.1.79)	Methylcitrate cycle	0	0	0	0	1	0	0	0	0	0	0	0	0	0	0	0	0	0	0	1	0	0	0	0	0	0	0	0	0	0	0	0	0	0
2-methylcitrate synthase (EC 2.3.3.5)	Methylcitrate cycle	1	1	1	1	0	1	1	1	1	1	1	0	1	2	1	1	1	1	1	1	1	2	1	1	1	1	1	1	1	2	1	1	0	1
Methylisocitrate lyase (EC 4.1.3.30)	Methylcitrate cycle	1	1	1	1	0	1	1	1	1	1	1	0	1	1	1	1	1	1	1	1	1	1	1	1	1	1	1	1	1	1	1	1	0	1
Aldehyde dehydrogenase A (EC 1.2.1.22)	Methylglyoxal Metabolism	0	0	0	0	1	0	0	0	0	0	0	1	0	0	0	0	0	0	0	0	0	0	0	0	0	0	0	0	0	0	0	0	0	0
NADPH-dependent methylglyoxal reductase (D-lactaldehyde dehydrogenase)	Methylglyoxal Metabolism	0	0	0	0	0	0	0	0	0	0	0	0	0	1	0	0	0	0	0	0	0	1	0	0	0	0	0	0	0	0	0	0	0	0
6-phosphogluconate dehydrogenase, decarboxylating (EC 1.1.1.44)	Pentose phosphate pathway	1	1	0	1	1	1	1	0	0	1	0	1	0	1	1	1	0	0	1	1	1	1	1	1	0	0	1	1	1	1	0	1	0	2
6-phosphogluconate dehydrogenase, decarboxylating (EC 1.1.1.44)	Pentose phosphate pathway	1	1	1	1	0	1	1	1	1	1	1	0	2	1	1	1	1	1	1	1	1	1	1	1	1	1	1	1	1	1	1	1	1	1
6-phosphogluconate dehydrogenase, decarboxylating (EC 1.1.1.44)	Pentose phosphate pathway	0	0	0	0	0	0	0	0	0	0	0	0	0	0	1	0	0	0	0	0	0	0	0	1	0	0	0	1	0	0	0	0	0	0
Ribose 5-phosphate isomerase A (EC 5.3.1.6)	Pentose phosphate pathway	0	0	0	0	1	0	0	0	0	0	0	1	0	0	0	0	0	0	0	0	0	0	0	0	0	0	0	0	0	0	0	0	0	0
Ribose 5-phosphate isomerase B (EC 5.3.1.6)	Pentose phosphate pathway	1	0	0	1	0	1	0	0	1	0	0	1	0	0	0	1	0	0	0	0	0	0	1	0	0	0	0	0	0	0	0	0	0	0
Ribulose-phosphate 3-epimerase (EC 5.1.3.1)	Pentose phosphate pathway	0	0	0	0	1	0	0	0	0	0	0	1	0	0	0	0	0	0	0	0	0	0	0	0	0	0	0	0	0	0	0	0	0	0
Ribulose-phosphate 3-epimerase (EC 5.1.3.1)	Pentose phosphate pathway	1	1	1	1	0	1	1	1	1	1	1	0	1	1	1	1	1	1	1	1	1	1	1	1	1	1	1	1	1	1	1	1	1	1
Transaldolase (EC 2.2.1.2)	Pentose phosphate pathway	1	1	1	2	0	1	1	1	1	1	1	0	1	1	1	2	1	1	1	1	1	1	2	1	1	1	1	1	1	1	1	1	1	1
Transaldolase (EC 2.2.1.2)	Pentose phosphate pathway	0	0	0	0	0	0	1	0	0	1	0	0	0	0	0	0	0	0	0	0	0	0	0	0	0	0	0	0	0	0	0	0	0	0
Transketolase (EC 2.2.1.1)	Pentose phosphate pathway	0	1	0	1	0	1	0	1	0	1	0	0	0	0	1	1	0	0	0	0	0	0	1	1	0	0	0	1	0	1	0	0	0	0
Transketolase (EC 2.2.1.1)	Pentose phosphate pathway	0	0	0	0	0	0	0	0	0	0	0	0	0	0	1	0	0	0	0	0	0	0	0	1	0	0	1	1	1	0	0	1	0	1
Transketolase (EC 2.2.1.1)	Pentose phosphate pathway	1	1	1	0	0	1	1	1	2	1	1	0	2	1	1	2	1	1	1	1	1	1	1	1	1	2	1	1	2	1	1	1	1	2
Transketolase (EC 2.2.1.1)	Pentose phosphate pathway	0	0	0	0	1	1	0	0	0	0	0	1	0	0	0	0	0	0	1	0	1	0	0	0	0	0	0	0	0	0	0	0	0	1
Transketolase, C-terminal section (EC 2.2.1.1)	Pentose phosphate pathway	0	0	0	0	0	1	0	0	0	0	0	0	0	0	0	0	0	0	0	0	0	0	0	0	0	0	0	0	0	1	0	0	0	0
Transketolase, N-terminal section (EC 2.2.1.1)	Pentose phosphate pathway	0	0	0	0	0	1	0	0	0	0	0	0	0	0	0	0	0	0	0	0	0	0	0	0	0	0	0	0	0	1	0	0	0	0
Xylulose-5-phosphate phosphoketolase (EC 4.1.2.9)	Pentose phosphate pathway	1	1	0	1	0	0	2	1	0	1	0	0	1	1	1	1	0	0	1	1	1	1	1	1	0	1	1	1	1	0	0	1	0	1
Alanine dehydrogenase (EC 1.4.1.1)	Pyruvate Alanine Serine Interconversions	0	0	0	0	1	0	0	0	0	0	0	1	0	0	0	0	0	0	0	0	0	0	0	0	0	0	0	0	0	0	0	0	0	0
Alanine dehydrogenase (EC 1.4.1.1)	Pyruvate Alanine Serine Interconversions	0	1	0	1	0	1	0	1	0	0	0	0	0	1	1	0	0	0	2	0	1	1	1	1	0	0	0	1	0	1	0	2	0	0
Alanine dehydrogenase (EC 1.4.1.1)	Pyruvate Alanine Serine Interconversions	1	2	1	1	1	1	1	2	1	1	1	3	2	1	2	1	0	1	1	1	1	1	1	2	1	1	2	2	1	1	1	1	1	1
Alanine dehydrogenase (EC 1.4.1.1)	Pyruvate Alanine Serine Interconversions	0	0	0	0	0	0	0	0	1	0	0	0	0	1	0	0	0	0	1	0	1	1	0	0	1	0	0	0	0	1	0	1	0	0
Alanine dehydrogenase (EC 1.4.1.1)	Pyruvate Alanine Serine Interconversions	0	1	0	0	0	0	0	1	0	0	0	0	0	0	0	0	0	0	0	0	0	0	0	0	0	0	0	0	0	0	0	0	0	0
L-alanine:glyoxylate aminotransferase (EC 2.6.1.44)	Pyruvate Alanine Serine Interconversions	0	0	0	0	0	0	0	0	0	0	0	0	1	1	1	0	0	0	0	0	0	1	0	1	0	0	1	1	1	1	0	0	1	0
Omega-amino acid--pyruvate aminotransferase (EC 2.6.1.18)	Pyruvate Alanine Serine Interconversions	0	0	0	0	1	0	0	0	0	0	0	1	0	0	0	0	0	0	0	0	0	0	0	0	0	0	0	0	0	0	0	0	0	0
Omega-amino acid--pyruvate aminotransferase (EC 2.6.1.18)	Pyruvate Alanine Serine Interconversions	1	1	1	1	0	1	1	1	0	1	0	0	1	0	1	0	0	1	1	1	1	0	1	1	1	1	1	1	1	0	1	1	0	0
Omega-amino acid--pyruvate aminotransferase (EC 2.6.1.18)	Pyruvate Alanine Serine Interconversions	0	0	0	0	1	0	0	0	0	0	0	2	0	0	0	0	0	0	0	0	0	0	0	0	0	0	0	0	0	0	0	0	0	0
D-malic enzyme (EC 1.1.1.83)	Pyruvate metabolism I: anaplerotic reactions, PEP	0	1	0	1	1	0	0	1	0	2	0	0	0	0	0	1	0	0	0	0	0	0	1	1	0	2	0	0	0	1	0	0	0	1
NADP-dependent malic enzyme (EC 1.1.1.40)	Pyruvate metabolism I: anaplerotic reactions, PEP	0	0	0	0	1	0	0	0	0	0	1	1	0	0	0	0	0	1	0	0	0	0	0	0	0	0	1	0	1	0	0	0	0	0
Phosphoenolpyruvate carboxykinase [ATP] (EC 4.1.1.49)	Pyruvate metabolism I: anaplerotic reactions, PEP	0	0	0	0	1	0	0	0	0	0	0	1	0	0	0	0	0	0	0	0	0	0	0	0	0	0	0	0	0	0	0	0	0	0
Phosphoenolpyruvate carboxykinase [GTP] (EC 4.1.1.32)	Pyruvate metabolism I: anaplerotic reactions, PEP	1	1	1	1	0	1	1	1	1	1	1	0	1	1	1	1	1	1	1	1	1	1	1	1	1	1	1	1	1	1	1	1	1	1
Phosphoenolpyruvate carboxylase (EC 4.1.1.31)	Pyruvate metabolism I: anaplerotic reactions, PEP	1	0	1	0	0	0	0	0	0	0	0	0	0	0	0	0	0	0	0	0	0	0	0	0	0	0	0	0	0	0	0	0	1	0
Acetate kinase (EC 2.7.2.1)	Pyruvate metabolism II: acetyl-CoA, acetogenesis from pyruvate	1	1	1	1	0	1	1	1	1	1	1	0	1	1	1	1	0	1	1	1	1	1	1	1	1	1	1	1	1	1	1	1	1	1
Acetate kinase (EC 2.7.2.1)	Pyruvate metabolism II: acetyl-CoA, acetogenesis from pyruvate	0	0	0	0	0	0	0	0	0	0	0	0	0	0	0	0	0	0	0	0	0	0	1	0	0	0	0	1	0	0	0	0	0	0
Acetate permease ActP (cation/acetate symporter)	Pyruvate metabolism II: acetyl-CoA, acetogenesis from pyruvate	1	0	1	0	0	0	0	0	0	0	0	0	0	0	0	0	0	0	0	0	0	0	0	0	0	0	0	0	0	0	0	0	0	0
Acetyl-CoA synthetase (ADP-forming) alpha and beta chains, putative	Pyruvate metabolism II: acetyl-CoA, acetogenesis from pyruvate	0	0	0	1	0	0	0	0	0	0	0	0	0	0	0	0	0	0	0	0	0	0	1	0	0	0	0	0	0	0	0	0	0	0
Acetyl-CoA synthetase (ADP-forming) alpha and beta chains, putative	Pyruvate metabolism II: acetyl-CoA, acetogenesis from pyruvate	0	0	0	0	1	0	0	0	0	0	0	1	0	0	0	0	0	0	0	0	0	0	0	0	0	0	0	0	0	0	0	0	0	0
Acetyl-coenzyme A synthetase (EC 6.2.1.1)	Pyruvate metabolism II: acetyl-CoA, acetogenesis from pyruvate	0	0	0	0	1	0	0	0	0	0	0	1	0	0	0	0	0	0	0	0	0	0	0	0	0	0	0	0	0	0	0	0	0	0
Acetyl-coenzyme A synthetase (EC 6.2.1.1)	Pyruvate metabolism II: acetyl-CoA, acetogenesis from pyruvate	0	1	1	2	0	1	0	1	0	1	1	0	1	1	1	1	0	0	1	0	1	1	2	1	0	1	1	1	1	1	1	1	0	1
Acetyl-coenzyme A synthetase (EC 6.2.1.1)	Pyruvate metabolism II: acetyl-CoA, acetogenesis from pyruvate	0	1	0	1	0	1	0	1	0	1	1	0	1	1	1	1	1	0	1	0	1	1	1	1	0	1	1	1	0	1	1	1	0	1
Acetyl-coenzyme A synthetase (EC 6.2.1.1)	Pyruvate metabolism II: acetyl-CoA, acetogenesis from pyruvate	0	1	0	1	0	1	0	1	0	0	0	0	0	1	1	1	0	0	0	0	0	1	1	1	0	0	0	1	0	1	0	0	0	1
Acetyl-coenzyme A synthetase (EC 6.2.1.1)	Pyruvate metabolism II: acetyl-CoA, acetogenesis from pyruvate	0	0	1	0	0	0	0	0	0	0	0	0	1	0	1	0	0	0	0	1	0	0	0	1	0	0	0	1	0	0	0	0	0	0
Acetyl-coenzyme A synthetase (EC 6.2.1.1)	Pyruvate metabolism II: acetyl-CoA, acetogenesis from pyruvate	0	0	0	0	0	0	0	0	0	0	0	0	0	1	0	0	0	0	0	0	0	1	0	0	0	0	0	0	0	0	0	0	0	0
Acylphosphate phosphohydrolase (EC 3.6.1.7), putative	Pyruvate metabolism II: acetyl-CoA, acetogenesis from pyruvate	0	1	1	1	0	1	1	1	0	1	0	0	1	1	1	0	0	1	1	0	1	1	1	1	1	0	1	1	1	1	0	1	0	0
Acylphosphate phosphohydrolase (EC 3.6.1.7), putative	Pyruvate metabolism II: acetyl-CoA, acetogenesis from pyruvate	1	0	0	0	1	0	0	0	0	0	1	1	0	0	0	0	0	0	0	0	0	0	0	0	0	0	0	0	0	0	0	0	0	0
Aldehyde dehydrogenase (EC 1.2.1.3)	Pyruvate metabolism II: acetyl-CoA, acetogenesis from pyruvate	1	1	1	1	0	1	1	1	1	1	0	0	1	1	1	1	0	1	1	1	1	1	1	1	1	1	0	1	0	1	0	1	0	1
Aldehyde dehydrogenase (EC 1.2.1.3)	Pyruvate metabolism II: acetyl-CoA, acetogenesis from pyruvate	1	1	1	1	0	1	1	1	1	1	0	0	1	1	1	1	0	1	1	1	1	1	1	1	1	1	0	1	0	1	0	1	0	1
Aldehyde dehydrogenase (EC 1.2.1.3)	Pyruvate metabolism II: acetyl-CoA, acetogenesis from pyruvate	1	2	1	2	0	3	1	2	0	2	2	0	1	0	2	3	0	1	2	1	2	0	2	3	1	1	1	2	0	0	1	2	0	2
Aldehyde dehydrogenase (EC 1.2.1.3)	Pyruvate metabolism II: acetyl-CoA, acetogenesis from pyruvate	1	0	0	0	0	0	1	0	0	0	0	0	0	0	0	0	0	0	0	0	0	0	0	0	0	0	0	0	0	0	1	0	0	0
NAD-independent protein deacetylase AcuC	Pyruvate metabolism II: acetyl-CoA, acetogenesis from pyruvate	0	0	0	0	1	0	0	0	0	0	0	1	0	0	0	0	0	0	0	0	0	0	0	0	0	0	0	0	0	0	0	0	0	0
Phosphate acetyltransferase (EC 2.3.1.8)	Pyruvate metabolism II: acetyl-CoA, acetogenesis from pyruvate	0	0	0	0	0	0	0	0	0	0	0	0	0	1	0	0	0	0	0	0	0	1	0	0	0	0	0	0	0	0	0	0	0	0
Pyruvate dehydrogenase E1 component alpha subunit (EC 1.2.4.1)	Pyruvate metabolism II: acetyl-CoA, acetogenesis from pyruvate	0	0	0	0	1	0	0	0	0	0	0	1	0	0	0	0	0	0	0	0	0	0	0	0	0	0	0	0	0	0	0	0	0	0
Pyruvate dehydrogenase E1 component alpha subunit (EC 1.2.4.1)	Pyruvate metabolism II: acetyl-CoA, acetogenesis from pyruvate	1	1	1	1	0	1	1	1	0	1	0	0	1	1	1	1	0	1	1	1	1	1	1	1	1	1	0	1	0	1	0	1	0	1
Pyruvate dehydrogenase E1 component alpha subunit (EC 1.2.4.1)	Pyruvate metabolism II: acetyl-CoA, acetogenesis from pyruvate	1	1	1	1	0	1	0	1	0	1	0	0	1	1	1	1	0	0	1	1	1	1	1	1	0	1	0	1	1	1	0	1	0	1
Pyruvate dehydrogenase E1 component alpha subunit (EC 1.2.4.1)	Pyruvate metabolism II: acetyl-CoA, acetogenesis from pyruvate	1	1	1	1	0	1	1	1	1	1	1	0	1	1	1	1	1	1	1	0	1	1	1	1	1	1	1	1	1	1	1	1	1	1
Pyruvate dehydrogenase E1 component beta subunit (EC 1.2.4.1)	Pyruvate metabolism II: acetyl-CoA, acetogenesis from pyruvate	1	1	1	1	1	1	0	1	0	1	0	1	1	1	1	1	0	0	1	1	1	1	1	1	0	1	0	1	1	1	0	1	0	1
Pyruvate dehydrogenase E1 component beta subunit (EC 1.2.4.1)	Pyruvate metabolism II: acetyl-CoA, acetogenesis from pyruvate	1	1	1	1	0	1	0	1	0	1	0	0	1	1	1	1	0	1	1	1	1	1	1	1	1	1	0	1	0	1	0	1	0	1
Pyruvate dehydrogenase E1 component beta subunit (EC 1.2.4.1)	Pyruvate metabolism II: acetyl-CoA, acetogenesis from pyruvate	0	1	0	1	0	0	0	1	0	1	0	0	0	0	1	0	0	0	0	0	0	0	1	1	0	0	0	1	0	0	0	0	0	0
Pyruvate dehydrogenase E1 component beta subunit (EC 1.2.4.1)	Pyruvate metabolism II: acetyl-CoA, acetogenesis from pyruvate	1	1	1	1	0	1	1	1	1	1	1	0	1	1	1	1	1	1	1	0	1	1	1	1	1	1	1	1	1	1	1	1	1	1
Pyruvate oxidase (EC 1.2.2.2)	0	0	1	0	2	0	1	0	0	1	0	0	0	0	0	0	0	1	0	0	0	0	0	1	0	1	0	1	0	1	0	1	0	1	1
cytosolic long-chain acyl-CoA thioester hydrolase family protein	Serine-glyoxylate cycle	0	0	0	0	0	0	0	0	1	0	0	0	0	0	0	0	1	0	0	0	0	0	0	0	0	0	0	0	0	0	1	0	1	0
decarboxylase	Serine-glyoxylate cycle	0	0	0	0	0	0	0	0	0	0	0	0	0	1	1	0	0	0	0	0	0	1	0	1	0	0	0	1	0	1	0	0	0	0
decarboxylase	Serine-glyoxylate cycle	0	0	0	0	0	0	0	0	0	0	0	0	0	1	1	0	0	0	0	0	0	1	0	1	0	0	0	1	0	1	0	0	0	0
Methylcrotonyl-CoA carboxylase biotin-containing subunit (EC 6.4.1.4)	Leucine Degradation and HMG-CoA Metabolism	0	0	0	0	1	0	0	0	0	0	0	1	0	0	0	0	0	0	0	0	0	0	0	0	0	0	0	0	0	0	0	0	0	0
Serine--glyoxylate aminotransferase (EC 2.6.1.45)	Serine-glyoxylate cycle	0	0	0	0	1	0	0	0	0	0	0	1	0	0	0	0	0	0	0	0	0	0	0	0	0	0	0	0	0	0	0	0	0	0
Fructokinase (EC 2.7.1.4)	Mannitol Utilization	0	0	0	0	1	0	0	0	0	0	0	1	0	0	0	0	0	0	0	0	0	0	0	0	0	0	0	0	0	0	0	0	0	0
Fructokinase (EC 2.7.1.4)	Mannitol Utilization	0	0	0	0	1	0	0	0	0	0	0	1	0	0	0	0	0	0	0	0	0	0	0	0	0	0	0	0	0	0	0	0	0	0
Fructokinase (EC 2.7.1.4)	Mannitol Utilization	0	0	0	0	0	0	0	0	0	0	0	0	0	1	0	0	0	0	0	0	0	1	0	0	0	0	0	0	0	1	0	0	1	0
Sucrose phosphorylase (EC 2.4.1.7)	Sucrose utilization	0	0	0	0	0	0	0	0	0	0	0	0	0	0	0	0	0	0	1	0	1	0	0	0	0	0	0	0	0	0	0	1	0	0
Fumarate hydratase class I, aerobic (EC 4.2.1.2)	TCA Cycle	0	1	0	1	0	0	0	1	0	0	0	0	0	0	0	0	0	0	0	0	0	0	1	0	0	0	0	0	0	1	0	0	0	0
Fumarate hydratase class II (EC 4.2.1.2)	TCA Cycle	1	1	1	1	1	1	1	1	1	1	1	1	1	1	1	1	1	1	1	1	1	1	1	1	1	1	1	1	1	1	1	1	1	1
Isocitrate dehydrogenase [NAD] (EC 1.1.1.41)	TCA Cycle	0	0	0	0	1	0	0	0	0	0	0	1	0	0	0	0	0	0	0	0	0	0	0	0	0	0	0	0	0	0	0	0	0	0
Isocitrate dehydrogenase [NAD] (EC 1.1.1.41)	TCA Cycle	0	0	0	0	1	0	0	0	0	0	0	1	0	0	0	0	0	0	0	0	0	0	0	0	0	0	0	0	0	0	0	0	0	0
Malate:quinone oxidoreductase (EC 1.1.5.4)	TCA Cycle	0	0	0	0	0	1	0	0	0	0	0	1	0	0	0	0	0	0	0	0	0	0	0	0	0	0	0	0	0	0	0	0	0	0
Succinyl-CoA ligase [ADP-forming] alpha chain (EC 6.2.1.5)	TCA Cycle	1	1	1	1	1	1	1	1	1	1	1	1	1	1	1	1	0	1	1	1	1	1	1	1	1	1	1	1	1	1	1	1	1	1
Succinyl-CoA ligase [ADP-forming] beta chain (EC 6.2.1.5)	TCA Cycle	1	1	1	1	1	1	1	1	1	1	1	1	1	1	1	1	0	1	1	1	1	1	1	1	1	1	1	1	1	1	1	1	1	1
1,4-alpha-glucan (glycogen) branching enzyme, GH-13-type (EC 2.4.1.18)	Trehalose Biosynthesis	1	1	1	1	0	1	1	1	1	1	0	0	1	1	1	1	1	1	1	1	1	1	1	1	1	1	1	1	1	1	1	1	1	1
1,4-alpha-glucan (glycogen) branching enzyme, GH-13-type (EC 2.4.1.18)	Trehalose Biosynthesis	0	0	0	0	0	0	0	0	0	0	0	0	0	1	0	0	0	0	0	0	0	1	0	0	0	0	0	0	0	0	0	0	0	0
Alpha,alpha-trehalose-phosphate synthase (EC 2.4.1.15)	0	1	1	1	1	0	1	0	1	1	1	0	0	1	1	1	1	1	1	1	1	1	1	1	1	1	1	1	1	1	1	1	1	1	1
Alpha-amylase (EC 3.2.1.1)	Trehalose Biosynthesis	0	0	0	0	0	0	0	0	0	0	0	0	0	0	1	1	0	0	0	0	0	0	0	1	0	1	0	1	0	0	0	0	0	0
Alpha-amylase (EC 3.2.1.1)	Trehalose Biosynthesis	1	1	1	1	0	1	1	1	0	1	1	0	1	1	1	1	0	1	1	1	1	1	1	1	1	1	1	1	1	1	0	1	1	1
Glucoamylase (EC 3.2.1.3)	Trehalose Biosynthesis	2	1	1	1	0	2	0	1	1	1	0	0	1	1	1	1	0	0	0	1	0	1	1	1	0	1	1	1	1	1	0	0	0	1
Glucoamylase (EC 3.2.1.3)	Trehalose Biosynthesis	0	0	0	0	1	0	1	0	0	0	0	0	0	1	0	0	0	0	0	0	0	1	0	0	1	0	1	0	1	0	0	0	0	0
Glucoamylase (EC 3.2.1.3)	Trehalose Biosynthesis	0	2	0	0	0	1	0	0	0	0	0	0	0	0	0	0	0	0	1	0	1	0	0	0	0	0	0	0	0	0	0	1	0	0
Glucoamylase (EC 3.2.1.3)	Trehalose Biosynthesis	0	0	0	0	0	0	0	0	0	0	0	0	0	2	0	0	0	0	0	0	0	2	0	0	0	0	0	0	0	1	0	0	0	0
Glucoamylase (EC 3.2.1.3)	Trehalose Biosynthesis	1	0	0	0	1	0	0	0	0	0	0	1	0	0	0	0	0	0	0	0	0	0	0	0	0	0	0	0	0	0	0	0	0	0
Glucoamylase (EC 3.2.1.3)	Trehalose Biosynthesis	0	0	0	1	0	0	0	0	0	0	0	0	0	0	0	0	0	0	0	0	0	0	0	0	1	0	0	0	0	0	0	0	0	0
Glycogen debranching enzyme (EC 3.2.1.-)	Trehalose Biosynthesis	1	1	0	1	0	1	1	1	0	1	1	0	1	1	1	1	0	1	1	1	1	1	1	1	1	1	1	1	1	1	0	1	0	1
Glycogen debranching enzyme (EC 3.2.1.-)	Trehalose Biosynthesis	0	1	1	1	1	1	1	1	0	1	1	1	1	1	1	1	0	0	1	0	1	1	1	1	0	1	2	1	1	2	0	1	1	1
Malto-oligosyltrehalose synthase (EC 5.4.99.15)	Trehalose Biosynthesis	0	1	0	1	0	1	1	1	0	1	1	0	1	1	1	1	0	0	1	0	1	1	1	1	0	1	1	1	1	1	0	1	0	1
Malto-oligosyltrehalose trehalohydrolase (EC 3.2.1.141)	Trehalose Biosynthesis	0	1	0	1	0	1	1	1	0	1	1	0	1	1	1	1	0	0	1	0	1	1	1	1	0	1	1	1	1	1	0	1	0	1
Malto-oligosyltrehalose trehalohydrolase (EC 3.2.1.141)	Trehalose Biosynthesis	0	0	0	0	0	0	0	0	0	0	0	0	0	1	0	0	0	0	0	0	0	1	0	0	0	0	0	0	0	0	0	0	0	0
Trehalose phosphorylase (EC 2.4.1.64)	Trehalose Biosynthesis	0	0	1	0	0	0	0	0	1	0	1	0	0	0	0	0	1	1	1	0	1	0	0	0	1	0	1	0	1	0	1	1	1	0
Trehalose phosphorylase (EC 2.4.1.64)	Trehalose Biosynthesis	0	2	0	0	0	1	0	0	0	0	0	0	0	0	0	0	0	0	0	0	0	0	0	0	0	0	0	0	0	0	0	0	0	1
Trehalose phosphorylase (EC 2.4.1.64)	Trehalose Biosynthesis	0	1	0	0	0	1	0	0	0	0	0	0	0	0	0	0	0	0	0	0	0	0	0	0	0	0	0	0	0	0	0	0	0	1
Trehalose phosphorylase (EC 2.4.1.64)	Trehalose Biosynthesis	0	1	0	0	0	0	0	0	0	0	0	0	0	0	0	0	0	0	0	0	0	0	0	0	0	0	0	0	0	0	0	0	0	1
Trehalose synthase (EC 5.4.99.16)	Trehalose Biosynthesis	1	1	0	1	1	1	0	1	0	1	0	1	1	1	1	1	0	0	0	0	0	1	1	1	0	1	1	1	1	1	0	0	1	1
Trehalose synthase (EC 5.4.99.16)	Trehalose Biosynthesis	0	0	0	0	0	0	1	0	0	0	0	0	0	0	0	0	0	0	0	0	0	0	0	0	1	0	0	0	1	0	0	0	0	0
Trehalose synthase (EC 5.4.99.16)	Trehalose Biosynthesis	0	0	0	0	0	0	0	0	0	0	0	0	0	1	0	0	0	0	0	0	0	1	0	0	0	0	0	0	0	0	0	0	0	0
Trehalose-6-phosphate phosphatase (EC 3.1.3.12)	Trehalose Biosynthesis	0	1	0	1	0	1	0	1	0	1	0	0	1	1	1	1	0	0	0	0	0	1	1	1	0	1	0	1	0	1	0	0	0	1
Trehalose-6-phosphate phosphatase (EC 3.1.3.12)	Trehalose Biosynthesis	0	0	0	0	0	0	1	0	0	0	0	0	1	2	0	0	0	0	1	0	1	2	0	0	0	0	1	0	1	0	0	1	0	0
Beta-phosphoglucomutase (EC 5.4.2.6)	Trehalose Uptake and Utilization	0	0	1	0	0	0	0	0	1	0	1	0	0	0	0	0	1	1	1	0	1	0	0	0	1	0	1	0	1	0	1	1	1	0
Glucose/mannose:H+ symporter GlcP	Trehalose Uptake and Utilization	1	1	0	1	0	1	0	1	0	1	0	0	1	1	1	1	0	0	1	0	1	1	1	1	0	1	1	1	1	1	0	1	1	1
PTS system, glucose-specific IIC component (EC 2.7.1.69)	Trehalose Uptake and Utilization	0	0	0	0	0	0	0	0	0	0	0	0	0	0	0	0	0	0	1	0	0	0	0	0	0	0	0	0	1	0	0	0	0	0
Putative cytoplasmic protein clustered with trehalase	Trehalose Uptake and Utilization	0	0	1	1	0	0	0	0	1	0	0	0	0	0	1	1	0	0	0	0	0	0	1	1	1	0	0	1	1	0	0	0	0	0
Putative cytoplasmic protein clustered with trehalase	Trehalose Uptake and Utilization	0	0	0	0	0	0	0	0	0	0	0	0	0	0	0	0	0	0	0	1	0	0	0	0	1	0	0	0	0	0	0	0	0	0
Acetyl xylan esterase (EC 3.1.1.41)	Xylose utilization	1	1	1	1	0	1	0	1	1	1	0	0	0	1	1	1	0	1	0	0	0	1	1	1	1	1	1	1	2	1	0	0	1	1
Alpha-xylosidase (EC 3.2.1.-)	Xylose utilization	1	0	0	0	0	0	0	0	0	0	0	0	0	0	0	0	0	0	0	0	0	0	0	0	1	0	2	0	1	0	0	0	1	0
Beta-xylosidase (EC 3.2.1.37)	Xylose utilization	0	0	0	0	0	0	0	0	0	0	0	0	0	0	0	0	0	0	0	0	0	0	0	0	0	0	1	0	0	0	0	0	1	0
Endo-1,4-beta-xylanase A precursor (EC 3.2.1.8)	Xylose utilization	0	0	0	2	0	0	0	0	0	0	0	0	0	0	0	1	0	0	1	0	0	0	2	0	0	0	1	0	0	0	0	0	0	1
Endo-1,4-beta-xylanase A precursor (EC 3.2.1.8)	Xylose utilization	0	0	0	0	0	0	0	0	0	0	0	0	0	0	0	1	0	0	0	0	0	0	0	0	0	0	0	0	0	0	0	0	0	1
Possible alpha-xyloside ABC transporter, ATP-binding component	Xylose utilization	2	0	0	0	0	0	0	0	1	0	0	0	0	0	0	0	0	0	0	0	0	0	0	0	0	0	0	0	0	0	0	0	0	0
Possible alpha-xyloside ABC transporter, permease component	Xylose utilization	0	0	0	0	0	0	0	0	1	0	0	0	0	0	0	0	0	0	0	0	0	0	0	0	0	0	0	0	0	0	0	0	1	0
Possible alpha-xyloside ABC transporter, permease component	Xylose utilization	0	0	0	0	0	0	0	0	0	0	0	0	0	0	1	0	0	0	0	0	0	0	0	1	1	0	0	1	0	0	0	0	0	0
Possible alpha-xyloside ABC transporter, permease component	Xylose utilization	2	0	0	0	0	0	0	0	1	0	0	0	0	0	0	0	0	0	0	0	0	0	0	0	0	0	0	0	0	0	0	0	0	0
Xylose isomerase (EC 5.3.1.5)	Xylose utilization	0	1	1	1	0	1	0	1	1	1	0	0	1	1	1	1	1	1	1	1	1	1	1	1	1	1	1	1	1	1	0	1	1	1
Xylose isomerase (EC 5.3.1.5)	Xylose utilization	1	1	0	1	0	1	0	1	1	0	0	0	1	1	1	1	0	1	1	1	0	1	1	1	1	1	1	1	1	1	0	0	1	1
Xylose-responsive transcription regulator, ROK family	Xylose utilization	1	1	0	1	0	1	0	1	1	1	0	0	1	1	1	1	0	1	1	1	0	1	1	1	1	1	1	1	1	1	0	0	1	1
Xylose-responsive transcription regulator, ROK family	Xylose utilization	1	0	1	0	0	0	0	0	1	0	0	0	0	0	0	0	0	1	0	1	0	0	0	0	1	0	1	0	1	0	0	0	0	0
Xylose-responsive transcription regulator, ROK family	Xylose utilization	0	0	0	0	0	0	0	0	1	0	0	0	0	0	0	1	0	0	1	0	0	0	0	0	0	0	1	0	1	0	0	0	1	0
Xylose-responsive transcription regulator, ROK family	Xylose utilization	0	0	0	1	0	0	0	0	0	0	0	0	0	0	0	0	0	0	0	1	0	0	0	0	1	0	0	0	0	0	0	0	0	0
Xylulose kinase (EC 2.7.1.17)	Xylose utilization	0	0	0	1	0	0	0	0	0	0	0	0	0	0	0	0	0	0	0	0	0	0	1	0	0	0	0	0	0	0	0	0	0	0
Xylulose kinase (EC 2.7.1.17)	Xylose utilization	1	1	0	1	0	1	0	1	2	1	1	0	1	1	1	1	0	1	1	1	0	1	1	1	1	1	1	1	1	1	0	0	1	1
Xylulose kinase (EC 2.7.1.17)	Xylose utilization	0	0	0	0	2	0	0	0	0	0	0	0	0	0	0	0	0	0	0	0	0	0	0	0	0	0	0	0	0	0	0	0	0	0
Xylulose kinase (EC 2.7.1.17)	Xylose utilization	0	1	0	1	0	0	0	1	0	1	0	1	0	0	1	1	0	0	0	0	0	0	1	1	0	1	0	1	0	0	0	0	0	1
Xylulose kinase (EC 2.7.1.17)	Xylose utilization	0	0	1	0	1	0	1	0	0	1	0	0	0	0	0	0	0	1	0	0	0	0	0	1	1	0	0	0	0	0	0	0	0	0
Xylulose kinase (EC 2.7.1.17)	Xylose utilization	0	0	0	0	0	0	1	0	0	1	0	0	0	0	0	0	0	0	0	0	0	0	0	0	0	0	0	0	0	0	0	0	0	0

## Sheet: Fig. 4B respiration
Table S6 Name of the specific genes
Gene name	Function description	Humibacter_albus_DSM_18994	Cryobacterium_sp_M91	Microbacterium_luticocti_DSM_19459	Cryobacterium_sp_Y50	Rubrobacter_xylanophilus_DSM9941	Cryobacterium_sp_Y11	Agrococcus_lahaulensis_DSM_17612	Cryobacterium_levicorallinum_CGMCC_111211	Microbacterium_gubbeenense_DSM_15944	Cryobacterium_sp_Y82	Gulosibacter_molinativorax_DSM_13485	Rubrobacter_radiotolerans_RSPS-4	Cryobacterium_luteum_CGMCC_111210	Cryobacterium_psychrotolerans_CGMCC_15382	Cryobacterium_sp_N21	Cryobacterium_sp_Y57	Pseudoclavibacter_soli_DSM_23366	Agromyces_italicus_DSM_16388	Cryobacterium_sp_M23	Cryobacterium_mesophilum_CGMCC_110440	Cryobacterium_sp_M25	Cryobacterium_sp_MLB-32	Cryobacterium_sp_Y62	Cryobacterium_sp_N19	Agromyces_subbeticus_DSM_16689	Cryobacterium_sp_Y29	Cryobacterium_arcticum_PAMC_27867	Cryobacterium_flavum_CGMCC_111215	Cryobacterium_sp_N22	Cryobacterium_roopkundense_RuG17	Leucobacter_chironomi_DSM_19883	Cryobacterium_sp_M96	Microbacterium_indicum_DSM_19969	Cryobacterium_sp_M15
Anaerobic dehydrogenases, typically selenocysteine-containing	Anaerobic respiratory reductases	0	0	0	0	1	0	0	0	0	0	0	1	0	0	0	0	0	0	0	0	0	0	0	0	0	0	0	0	0	0	0	0	0	0
ATP synthase delta chain (EC 3.6.3.14)	F0F1-type ATP synthase	0	0	0	0	1	0	0	0	0	0	0	1	0	0	0	0	0	0	0	0	0	0	0	0	0	0	0	0	0	0	0	0	0	0
ATP synthase epsilon chain (EC 3.6.3.14)	F0F1-type ATP synthase	0	0	0	0	1	0	0	0	0	0	0	1	0	0	0	0	0	0	0	0	0	0	0	0	0	0	0	0	0	0	0	0	0	0
ATP synthase F0 sector subunit b (EC 3.6.3.14)	F0F1-type ATP synthase	0	0	0	0	1	0	0	0	0	0	0	1	0	0	0	0	0	0	0	0	0	0	0	0	0	0	0	0	0	0	0	0	0	0
ATP synthase F0 sector subunit c (EC 3.6.3.14)	F0F1-type ATP synthase	0	0	0	0	1	0	0	0	0	0	0	1	0	0	0	0	0	0	0	0	0	0	0	0	0	0	0	0	0	0	0	0	0	0
ATP synthase gamma chain (EC 3.6.3.14)	F0F1-type ATP synthase	0	0	0	0	1	0	0	0	0	0	0	1	0	0	0	0	0	0	0	0	0	0	0	0	0	0	0	0	0	0	0	0	0	0
Carbon monoxide dehydrogenase large chain (EC 1.2.99.2)	Carbon monoxide oxidation	0	0	0	0	1	0	0	0	0	0	0	2	0	0	0	0	0	0	0	0	0	0	0	0	0	0	0	0	0	0	0	0	0	0
Carbon monoxide dehydrogenase medium chain (EC 1.2.99.2)	Carbon monoxide oxidation	0	0	0	0	1	0	0	0	0	0	0	1	0	0	0	0	0	0	0	0	0	0	0	0	0	0	0	0	0	0	0	0	0	0
Carbon monoxide oxidation accessory protein CoxG	Carbon monoxide oxidation	0	0	0	0	2	0	0	0	0	0	0	2	0	0	0	0	0	0	0	0	0	0	0	0	0	0	0	0	0	0	0	0	0	0
Ccs1/ResB-related putative cytochrome C-type biogenesis protein	Biogenesis of c-type cytochromes	2	1	1	1	0	1	2	1	1	1	1	0	1	1	1	1	1	1	1	1	1	1	1	1	1	1	2	1	1	1	2	1	1	1
Coenzyme F420-dependent oxidoreductase	Anaerobic respiratory reductases	0	0	0	0	0	0	0	0	0	0	0	0	0	1	1	0	0	0	0	0	0	1	0	1	0	0	0	1	0	0	0	0	0	0
Coenzyme F420-dependent oxidoreductase	Anaerobic respiratory reductases	0	1	0	0	0	0	0	0	0	0	0	0	0	0	0	0	0	0	0	0	0	0	0	0	0	0	0	0	0	0	0	0	0	1
Coenzyme F420-reducing hydrogenase, beta subunit	Hydrogenases	0	0	0	0	1	0	0	0	0	0	0	1	0	0	0	0	0	0	0	0	0	0	0	0	0	0	0	0	0	0	0	0	0	0
Copper metallochaperone, bacterial analog of Cox17 protein	Biogenesis of cytochrome c oxidases	0	0	0	0	0	0	0	0	1	0	0	0	0	0	0	0	0	0	0	0	0	0	0	0	0	0	0	0	0	0	0	0	1	0
Copper metallochaperone, bacterial analog of Cox17 protein	Biogenesis of cytochrome c oxidases	0	0	0	0	0	0	0	0	1	0	0	0	1	1	1	0	0	1	1	0	1	1	0	1	0	0	0	1	0	1	1	1	0	0
Cytochrome c oxidase polypeptide I (EC 1.9.3.1)	Terminal cytochrome C oxidases	0	0	0	0	0	0	0	0	0	0	0	0	0	0	0	0	0	0	0	0	1	0	1	0	0	1	0	0	0	0	0	0	0	0
Cytochrome c oxidase polypeptide III (EC 1.9.3.1)	Terminal cytochrome C oxidases	1	1	1	1	0	1	1	1	1	1	1	0	1	1	1	1	1	1	1	1	1	1	1	1	1	1	1	1	1	1	1	1	1	1
Cytochrome c551/c552	Soluble cytochromes and functionally related electron carriers	0	0	0	0	0	0	0	0	1	0	0	0	1	0	0	1	0	0	0	0	0	0	0	0	0	0	0	0	0	1	0	0	0	1
Cytochrome c551/c552	Soluble cytochromes and functionally related electron carriers	0	0	0	0	0	0	0	0	0	0	0	0	1	0	0	0	0	0	0	0	0	0	0	0	0	0	0	0	0	1	0	0	0	1
Cytochrome c551/c552	Soluble cytochromes and functionally related electron carriers	0	0	0	0	0	0	0	0	1	0	0	0	0	0	0	0	0	0	0	0	0	0	0	0	1	0	0	0	0	0	0	0	0	0
Cytochrome c-type biogenesis protein CcsA/ResC	Biogenesis of c-type cytochromes	2	1	1	2	0	1	3	1	1	1	1	0	1	1	1	1	1	1	1	1	1	1	2	1	1	1	2	1	1	1	2	1	1	1
Cytochrome c-type biogenesis protein CcsA/ResC	Biogenesis of c-type cytochromes	0	0	0	1	0	0	0	0	0	0	0	0	0	0	0	1	0	0	0	0	0	0	1	0	0	0	0	0	0	0	0	0	0	0
Cytochrome d ubiquinol oxidase subunit I (EC 1.10.3.-)	Terminal cytochrome d ubiquinol oxidases	0	1	1	1	0	1	0	1	0	1	0	0	1	1	1	1	1	1	1	0	1	1	1	1	1	1	1	1	1	1	1	1	0	1
Cytochrome d ubiquinol oxidase subunit I (EC 1.10.3.-)	Terminal cytochrome d ubiquinol oxidases	0	1	0	3	0	1	0	1	0	2	0	0	1	0	2	1	0	0	0	0	0	0	1	1	0	2	0	2	0	0	0	0	0	0
Cytochrome d ubiquinol oxidase subunit I (EC 1.10.3.-)	Terminal cytochrome d ubiquinol oxidases	1	0	0	0	0	0	1	0	1	0	1	0	0	0	0	0	0	0	0	0	0	0	0	0	0	0	0	0	0	0	0	0	1	0
Cytochrome d ubiquinol oxidase subunit I (EC 1.10.3.-)	Terminal cytochrome d ubiquinol oxidases	0	1	0	0	1	1	0	1	0	0	0	0	0	0	0	0	0	0	0	0	0	0	0	0	0	0	0	0	0	0	0	0	0	0
Cytochrome d ubiquinol oxidase subunit I (EC 1.10.3.-)	Terminal cytochrome d ubiquinol oxidases	0	0	0	0	0	1	0	0	0	0	0	0	0	0	0	0	0	0	0	0	0	0	0	0	0	0	0	0	0	0	0	0	0	1
Cytochrome d ubiquinol oxidase subunit II (EC 1.10.3.-)	Terminal cytochrome d ubiquinol oxidases	0	1	1	1	0	1	0	1	0	1	0	0	1	1	1	1	1	1	1	0	1	1	1	1	1	1	1	1	1	1	1	1	0	1
Cytochrome d ubiquinol oxidase subunit II (EC 1.10.3.-)	Terminal cytochrome d ubiquinol oxidases	1	0	0	0	0	0	1	0	1	0	1	0	0	0	0	0	0	0	0	0	0	0	0	0	0	0	0	0	0	0	0	0	1	0
Cytochrome oxidase biogenesis protein Surf1, facilitates heme A insertion	Biogenesis of cytochrome c oxidases	0	0	0	0	0	0	0	0	0	0	0	0	0	0	0	0	0	0	0	0	0	0	0	0	0	0	0	0	0	0	2	0	0	0
Cytochrome oxidase biogenesis protein Surf1, facilitates heme A insertion	Biogenesis of cytochrome c oxidases	0	1	0	1	0	1	0	1	0	1	1	0	1	1	1	1	0	1	1	1	1	1	1	1	1	1	1	1	1	1	0	1	0	1
Cytochrome oxidase biogenesis protein Surf1, facilitates heme A insertion	Biogenesis of cytochrome c oxidases	0	1	0	1	0	1	0	1	0	1	0	0	1	1	1	1	0	1	1	1	1	1	1	1	1	1	1	1	1	1	0	1	0	1
Cytochrome oxidase biogenesis protein Surf1, facilitates heme A insertion	Biogenesis of cytochrome c oxidases	0	0	1	0	0	0	0	0	1	0	0	0	0	0	0	0	0	0	0	0	0	0	0	0	0	0	0	0	0	0	0	0	1	0
Cytochrome oxidase biogenesis protein Surf1, facilitates heme A insertion	Biogenesis of cytochrome c oxidases	0	0	1	0	0	0	0	0	1	0	0	0	0	0	0	0	0	0	0	0	0	0	0	0	0	0	0	0	0	0	0	0	1	0
D-amino acid dehydrogenase small subunit (EC 1.4.99.1)	Respiratory dehydrogenases 1	0	0	0	0	1	0	0	0	0	0	1	0	0	0	0	0	0	0	0	1	0	0	0	0	0	0	0	0	0	0	0	0	0	0
D-amino acid dehydrogenase small subunit (EC 1.4.99.1)	Respiratory dehydrogenases 1	0	0	0	0	0	0	0	0	0	1	0	0	0	1	0	0	0	0	0	0	0	1	0	0	0	0	0	0	0	0	0	0	0	0
D-Lactate dehydrogenase (EC 1.1.2.5)	Respiratory dehydrogenases 1	0	0	0	0	0	0	0	0	1	0	0	0	0	0	0	0	1	0	0	0	0	0	0	0	0	0	0	0	0	0	0	0	0	0
Ferredoxin	Soluble cytochromes and functionally related electron carriers	0	0	0	0	1	0	0	0	0	0	0	1	0	0	0	0	0	0	0	0	0	0	0	0	0	0	0	0	0	0	0	0	0	0
Ferredoxin	Soluble cytochromes and functionally related electron carriers	2	3	1	2	2	2	1	3	1	2	1	1	2	2	3	3	1	3	2	1	2	2	2	3	1	2	1	3	1	2	1	2	1	2
Ferredoxin	Soluble cytochromes and functionally related electron carriers	1	0	1	0	0	0	0	0	0	0	0	0	0	0	0	0	0	0	0	0	0	0	0	0	1	0	0	0	0	0	0	0	1	0
Ferredoxin	Soluble cytochromes and functionally related electron carriers	0	0	0	0	0	0	0	0	0	0	0	0	0	0	0	0	0	0	1	0	1	0	0	0	0	0	1	0	0	0	0	1	0	0
Ferredoxin	Soluble cytochromes and functionally related electron carriers	0	0	0	0	0	0	1	0	1	0	0	1	0	0	0	0	0	0	0	0	0	0	0	0	0	0	0	0	0	0	0	0	0	0
Ferredoxin	Soluble cytochromes and functionally related electron carriers	0	0	0	0	1	0	0	1	0	1	0	0	0	0	0	0	0	0	0	0	0	0	0	0	0	0	0	0	0	0	0	0	0	0
Ferredoxin	Soluble cytochromes and functionally related electron carriers	0	0	1	0	0	0	0	0	1	0	0	0	0	0	0	0	0	0	0	0	0	0	0	0	0	0	0	0	0	0	0	0	1	0
Ferredoxin	Soluble cytochromes and functionally related electron carriers	0	1	0	0	0	0	0	1	0	0	0	0	0	0	0	0	0	0	0	0	0	0	0	0	0	0	0	0	0	0	0	0	0	0
Ferredoxin	Soluble cytochromes and functionally related electron carriers	0	0	0	0	0	0	0	0	0	0	0	0	0	1	0	0	0	0	0	0	0	1	0	0	0	0	0	0	0	0	0	0	0	0
Ferredoxin reductase	Anaerobic respiratory reductases	2	2	1	1	0	3	0	1	0	2	0	0	1	0	1	1	0	1	2	1	2	0	1	1	0	1	1	1	0	0	0	1	0	1
Ferredoxin reductase	Anaerobic respiratory reductases	0	0	0	1	0	0	0	0	0	0	0	0	0	0	0	0	0	0	0	0	0	0	1	0	0	0	0	0	0	0	0	0	0	0
Ferredoxin reductase	Anaerobic respiratory reductases	1	0	0	0	0	0	0	0	0	0	0	0	0	0	0	0	0	0	0	0	0	0	0	0	0	0	0	0	0	0	1	0	0	0
Ferredoxin reductase	Anaerobic respiratory reductases	1	0	1	0	0	0	0	0	0	0	0	0	0	0	0	0	0	0	0	0	0	0	0	0	0	0	0	0	0	0	0	0	0	0
Ferredoxin reductase	Anaerobic respiratory reductases	0	0	0	0	1	0	0	0	0	0	0	1	0	0	0	0	0	0	0	0	0	0	0	0	0	0	0	0	0	0	0	0	0	0
Ferredoxin reductase	Anaerobic respiratory reductases	0	0	0	1	0	0	0	1	0	0	0	0	1	1	1	0	0	0	0	0	0	1	1	1	0	0	0	1	0	1	0	0	0	0
Ferredoxin reductase	Anaerobic respiratory reductases	0	0	0	0	0	0	0	0	0	0	0	0	0	0	0	0	0	0	0	0	0	0	0	0	0	0	1	0	1	1	0	0	0	0
Ferredoxin reductase	Anaerobic respiratory reductases	0	0	0	0	0	0	0	0	0	0	0	0	1	0	1	0	0	0	0	0	0	0	0	0	0	0	0	1	0	0	0	0	0	0
Fe-S-cluster-containing hydrogenase components 1	Anaerobic respiratory reductases	0	0	0	0	1	0	0	0	0	0	0	1	0	0	0	0	0	0	0	0	0	0	0	0	0	0	0	0	0	0	0	0	0	0
Flavodoxin reductases (ferredoxin-NADPH reductases) family 1	Anaerobic respiratory reductases	0	0	1	0	0	0	0	0	0	0	0	0	0	0	0	0	0	0	0	0	0	0	0	0	0	0	0	0	0	0	0	0	1	0
Flavodoxin reductases (ferredoxin-NADPH reductases) family 1	Anaerobic respiratory reductases	0	0	0	0	0	0	0	0	0	1	0	0	0	0	0	1	0	0	0	0	0	0	0	0	1	1	1	0	1	0	1	0	0	1
Flavodoxin reductases (ferredoxin-NADPH reductases) family 1	Anaerobic respiratory reductases	0	1	0	0	0	0	0	1	0	0	0	0	0	0	0	0	0	0	0	0	0	0	0	0	0	0	0	0	0	0	0	0	0	1
Formate dehydrogenase chain D (EC 1.2.1.2)	Formate hydrogenase	1	1	1	1	1	1	0	1	1	1	1	1	1	1	1	1	0	0	1	0	1	1	1	1	0	1	1	1	1	1	0	1	0	1
Formate dehydrogenase O beta subunit (EC 1.2.1.2)	Formate hydrogenase	0	0	0	0	1	0	0	0	0	0	0	1	0	0	0	0	0	0	0	0	0	0	0	0	0	0	0	0	0	0	0	0	0	0
Formate hydrogenlyase subunit 3	Formate hydrogenase	0	0	0	0	0	0	0	0	0	0	0	2	0	0	0	0	0	0	0	0	0	0	0	0	0	0	0	0	0	0	0	0	0	0
Formate hydrogenlyase subunit 3	Formate hydrogenase	0	1	0	1	0	1	0	1	0	1	0	0	1	1	1	1	0	0	1	0	1	1	1	1	0	1	0	1	0	1	0	1	0	1
Formate hydrogenlyase subunit 3	Formate hydrogenase	0	1	0	1	0	0	0	0	0	0	0	0	0	0	0	0	0	0	0	0	0	0	1	0	0	0	0	0	0	0	0	0	0	0
Formate hydrogenlyase subunit 4	Formate hydrogenase	0	0	0	0	0	1	0	0	0	0	0	0	0	0	0	0	0	0	0	0	0	0	0	0	0	1	0	0	0	0	0	0	0	0
Formate hydrogenlyase subunit 4	Formate hydrogenase	0	1	0	1	0	1	0	1	0	1	0	0	1	1	1	1	0	0	1	0	1	1	1	1	0	1	0	1	0	1	0	1	0	1
Formate hydrogenlyase subunit 4	Formate hydrogenase	0	1	0	1	0	0	0	0	0	0	0	0	0	0	0	0	0	0	0	0	0	0	1	0	0	0	0	0	0	0	0	0	0	0
Formate hydrogenlyase subunit 5	Formate hydrogenase	0	1	0	1	0	1	0	1	0	1	0	0	1	1	1	1	0	0	1	0	1	1	1	1	0	1	0	1	0	1	0	1	0	1
Formate hydrogenlyase subunit 5	Formate hydrogenase	0	0	0	1	0	1	0	0	1	2	0	0	0	0	0	1	0	0	0	0	0	0	1	1	0	0	0	1	0	1	0	0	0	0
Formate hydrogenlyase subunit 5	Formate hydrogenase	0	1	0	1	0	0	0	0	0	0	0	0	0	0	0	0	0	0	0	0	0	0	1	0	0	0	0	0	0	0	0	0	0	0
Formate hydrogenlyase subunit 7	Formate hydrogenase	0	1	0	1	0	1	0	1	0	1	0	0	1	1	1	1	0	0	1	0	1	1	1	1	0	1	0	1	0	1	0	1	0	1
Fumarate reductase flavoprotein subunit (EC 1.3.99.1)	Succinate dehydrogenase	0	0	0	2	1	0	0	0	0	1	0	0	0	0	0	1	0	0	0	0	0	0	0	1	0	0	1	0	0	0	0	0	0	0
Glucose-methanol-choline (GMC) oxidoreductase:NAD binding site	Respiratory dehydrogenases 1	0	1	0	1	0	1	0	1	0	1	0	0	1	1	1	1	0	0	1	0	1	1	1	1	0	1	1	1	1	1	0	1	0	1
Glucose-methanol-choline (GMC) oxidoreductase:NAD binding site	Respiratory dehydrogenases 1	0	0	0	1	0	0	0	0	0	0	0	1	0	0	0	1	0	0	0	0	0	0	1	0	0	1	0	0	0	0	0	0	1	1
Glucose-methanol-choline (GMC) oxidoreductase:NAD binding site	Respiratory dehydrogenases 1	0	1	0	0	0	0	0	1	0	0	0	0	0	0	0	0	0	0	0	0	0	0	0	0	0	0	1	0	0	1	0	0	0	0
Glucose-methanol-choline (GMC) oxidoreductase:NAD binding site	Respiratory dehydrogenases 1	0	0	0	0	0	0	0	0	0	0	0	0	0	0	0	1	0	0	0	0	0	0	0	0	0	0	0	0	0	0	0	0	0	1
Glucose-methanol-choline (GMC) oxidoreductase:NAD binding site	Respiratory dehydrogenases 1	0	1	0	0	0	1	0	0	0	0	0	0	0	0	0	0	0	0	0	0	0	0	0	0	0	0	0	0	0	0	0	0	0	0
Glycerol dehydrogenase (EC 1.1.1.6)	Respiratory dehydrogenases 1	0	1	0	0	0	0	0	1	0	1	0	0	0	0	0	1	0	0	1	0	1	0	0	0	0	0	0	0	0	0	0	1	0	1
Glycerol-3-phosphate dehydrogenase (EC 1.1.5.3)	Respiratory dehydrogenases 1	1	1	0	1	0	1	1	1	0	1	1	0	1	1	1	1	1	1	1	1	1	1	1	1	1	1	1	1	1	1	0	1	0	1
Heme O synthase, protoheme IX farnesyltransferase (EC 2.5.1.-) COX10-CtaB	Biogenesis of cytochrome c oxidases	1	1	1	1	0	1	1	1	1	1	1	0	1	1	1	1	1	1	1	1	1	1	1	1	1	1	1	1	1	1	1	1	1	1
Heme O synthase, protoheme IX farnesyltransferase (EC 2.5.1.-) COX10-CtaB	Biogenesis of cytochrome c oxidases	0	0	0	0	0	0	0	0	0	0	0	0	0	0	0	0	0	0	1	0	1	0	0	0	0	0	0	0	0	0	0	1	0	0
hydrogenase, group 4, HycG subunit, putative	Formate hydrogenase	0	1	0	1	0	0	0	0	0	0	0	0	0	0	0	0	0	0	0	0	0	0	1	0	0	0	0	0	0	0	0	0	0	0
hydrogenase, group 4, HycG subunit, putative	Formate hydrogenase	0	1	0	1	0	0	0	0	0	0	0	0	0	0	0	0	0	0	0	0	0	0	1	0	0	0	0	0	0	0	0	0	0	0
Hydrogenase-4 component E (EC 1.-.-.-)	Formate hydrogenase	0	1	0	1	0	1	0	1	0	1	0	0	1	1	1	1	0	0	1	0	1	1	1	1	0	1	0	1	0	1	0	1	0	1
Hydrogenase-4 component F (EC 1.-.-.-)	Formate hydrogenase	0	1	0	1	0	0	0	0	0	0	0	0	0	0	0	0	0	0	0	0	0	0	1	0	0	0	0	0	0	0	0	0	0	0
L-lactate dehydrogenase (EC 1.1.2.3)	Respiratory dehydrogenases 1	0	0	0	1	1	1	0	1	0	1	0	1	0	0	1	1	0	0	0	0	0	0	1	1	0	1	0	1	0	0	0	0	0	1
L-lactate dehydrogenase (EC 1.1.2.3)	Respiratory dehydrogenases 1	1	1	1	1	0	1	1	1	1	1	1	0	1	1	1	1	1	1	1	1	1	1	1	1	1	1	1	1	1	1	1	1	1	1
L-lactate dehydrogenase (EC 1.1.2.3)	Respiratory dehydrogenases 1	0	0	0	0	1	0	0	0	0	0	0	1	0	0	0	0	0	0	0	1	0	0	0	0	0	0	0	0	0	0	0	0	0	0
L-lactate dehydrogenase (EC 1.1.2.3)	Respiratory dehydrogenases 1	1	1	1	1	0	1	1	1	1	1	0	0	1	1	1	1	0	1	1	0	1	1	1	1	1	1	1	1	1	1	0	1	1	1
L-lactate dehydrogenase (EC 1.1.2.3)	Respiratory dehydrogenases 1	0	0	0	1	0	0	0	0	0	0	0	0	0	0	0	0	0	0	0	0	0	0	0	1	0	0	0	0	0	0	0	0	0	0
NAD(P)H-quinone oxidoreductase chain J (EC 1.6.5.2)	Respiratory Complex I	1	1	0	0	0	1	0	0	0	0	0	0	0	0	0	0	0	0	0	0	0	0	0	0	0	0	0	0	0	0	0	0	0	1
NAD-dependent formate dehydrogenase (EC 1.2.1.2)	Formate hydrogenase	0	1	0	1	0	0	0	1	0	0	0	0	0	1	1	1	0	0	0	0	0	1	1	1	0	0	0	1	0	0	0	0	0	1
NADH dehydrogenase (EC 1.6.99.3)	Respiratory dehydrogenases 1	0	0	0	1	0	0	0	0	0	0	0	0	0	0	0	0	0	0	0	0	0	0	1	0	0	0	0	0	0	0	0	0	0	0
NADH dehydrogenase (EC 1.6.99.3)	Respiratory dehydrogenases 1	0	0	1	0	0	0	0	0	0	0	0	0	0	0	0	0	1	0	0	0	0	0	0	0	0	0	0	0	0	0	0	0	0	0
NADH dehydrogenase (EC 1.6.99.3)	Respiratory dehydrogenases 1	0	0	0	0	1	0	0	0	0	0	0	1	0	0	0	0	0	0	0	0	0	0	0	0	0	0	0	0	0	0	0	0	0	0
NADH dehydrogenase (EC 1.6.99.3)	Respiratory dehydrogenases 1	0	0	0	0	2	0	0	0	0	0	0	2	0	0	0	0	0	0	0	0	0	0	0	0	0	0	0	0	0	0	0	0	0	0
NADH dehydrogenase (EC 1.6.99.3)	Respiratory dehydrogenases 1	1	1	1	1	0	1	1	1	1	1	1	0	1	1	1	1	1	1	1	1	1	1	1	1	1	1	1	1	1	1	1	1	1	1
NADH dehydrogenase (EC 1.6.99.3)	Respiratory dehydrogenases 1	0	0	0	0	0	0	0	0	0	0	0	0	0	0	0	0	0	0	0	0	0	0	0	0	0	0	1	0	1	0	0	0	0	0
NADH ubiquinone oxidoreductase chain A (EC 1.6.5.3)	Respiratory Complex I	0	0	0	0	1	0	0	0	0	0	0	1	0	0	0	0	0	0	0	0	0	0	0	0	0	0	0	0	0	0	0	0	0	0
NADH-ubiquinone oxidoreductase chain B (EC 1.6.5.3)	Respiratory Complex I	0	0	0	0	1	0	0	0	0	0	0	1	0	0	0	0	0	0	0	0	0	0	0	0	0	0	0	0	0	0	0	0	0	0
NADH-ubiquinone oxidoreductase chain C (EC 1.6.5.3)	Respiratory Complex I	0	0	0	0	1	0	0	0	0	0	0	1	0	0	0	0	0	0	0	0	0	0	0	0	0	0	0	0	0	0	0	0	0	0
NADH-ubiquinone oxidoreductase chain D (EC 1.6.5.3)	Respiratory Complex I	0	0	0	0	1	0	0	0	0	0	0	1	0	0	0	0	0	0	0	0	0	0	0	0	0	0	0	0	0	0	0	0	0	0
NADH-ubiquinone oxidoreductase chain H (EC 1.6.5.3)	Respiratory Complex I	0	0	0	0	1	0	0	0	0	0	0	1	0	0	0	0	0	0	0	0	0	0	0	0	0	0	0	0	0	0	0	0	0	0
NADH-ubiquinone oxidoreductase chain H (EC 1.6.5.3)	Respiratory Complex I	0	1	0	0	0	1	0	0	0	0	0	0	0	0	0	0	0	0	0	0	0	0	0	0	0	0	0	0	0	0	0	0	0	1
NADH-ubiquinone oxidoreductase chain I (EC 1.6.5.3)	Respiratory Complex I	0	0	0	0	1	0	0	0	0	0	0	1	0	0	0	0	0	0	0	0	0	0	0	0	0	0	0	0	0	0	0	0	0	0
NADH-ubiquinone oxidoreductase chain J (EC 1.6.5.3)	Respiratory Complex I	0	0	0	0	1	0	0	0	0	0	0	1	0	0	0	0	0	0	0	0	0	0	0	0	0	0	0	0	0	0	0	0	0	0
NADH-ubiquinone oxidoreductase chain K (EC 1.6.5.3)	Respiratory Complex I	0	0	0	0	1	0	0	0	0	0	0	1	0	0	0	0	0	0	0	0	0	0	0	0	0	0	0	0	0	0	0	0	0	0
NADH-ubiquinone oxidoreductase chain K (EC 1.6.5.3)	Respiratory Complex I	1	1	0	0	0	1	0	0	0	0	0	0	0	0	0	0	0	0	0	0	0	0	0	0	0	0	0	0	0	0	0	0	0	1
NADH-ubiquinone oxidoreductase chain L (EC 1.6.5.3)	Respiratory Complex I	0	0	0	0	0	0	0	0	0	0	0	2	0	0	0	0	0	0	0	0	0	0	0	0	0	0	0	0	0	0	0	0	0	0
NADH-ubiquinone oxidoreductase chain L (EC 1.6.5.3)	Respiratory Complex I	0	0	0	0	1	0	0	0	0	0	0	1	0	0	0	0	0	0	0	0	0	0	0	0	0	0	0	0	0	0	0	0	0	0
NADH-ubiquinone oxidoreductase chain L (EC 1.6.5.3)	Respiratory Complex I	0	1	0	0	0	0	0	0	0	0	0	0	0	0	0	0	0	0	0	0	0	0	0	0	0	0	0	0	0	0	0	0	0	1
NADH-ubiquinone oxidoreductase chain M (EC 1.6.5.3)	Respiratory Complex I	0	0	0	0	1	0	0	0	0	0	0	1	0	0	0	0	0	0	0	0	0	0	0	0	0	0	0	0	0	0	0	0	0	0
NADH-ubiquinone oxidoreductase chain M (EC 1.6.5.3)	Respiratory Complex I	1	1	0	0	0	1	0	0	0	0	0	0	0	0	0	0	0	0	0	0	0	0	0	0	0	0	0	0	0	0	0	0	0	1
NADH-ubiquinone oxidoreductase chain N (EC 1.6.5.3)	Respiratory Complex I	0	0	0	0	1	0	0	0	0	0	0	1	0	0	0	0	0	0	0	0	0	0	0	0	0	0	0	0	0	0	0	0	0	0
NADH-ubiquinone oxidoreductase chain N (EC 1.6.5.3)	Respiratory Complex I	1	1	0	0	0	1	0	0	0	1	0	0	0	0	0	0	0	0	0	0	0	0	0	0	0	0	0	0	0	0	0	0	0	1
Oxaloacetate decarboxylase alpha chain (EC 4.1.1.3)	Na+ translocating decarboxylases and related biotin-dependent enzymes	0	0	0	1	0	0	0	0	0	0	0	0	0	0	0	0	0	0	0	0	0	0	1	0	0	0	0	0	0	0	0	0	0	0
Proline dehydrogenase (EC 1.5.99.8) (Proline oxidase)	Respiratory dehydrogenases 1	0	0	0	0	1	0	0	0	0	0	0	1	0	0	0	0	0	0	0	0	0	0	0	0	0	0	0	0	0	0	0	0	0	0
Proline dehydrogenase (EC 1.5.99.8) (Proline oxidase)	Respiratory dehydrogenases 1	1	1	1	1	0	1	2	1	1	1	1	0	1	1	1	1	0	1	1	1	1	1	1	1	1	1	2	1	1	1	1	1	1	1
putative Fe-S, FMN containing oxidoreductase	Respiratory dehydrogenases 1	0	0	0	0	0	0	0	0	0	0	0	0	0	1	0	0	0	0	0	0	0	1	0	0	0	0	1	0	0	0	0	0	0	0
Putative formate dehydrogenase oxidoreductase protein	Formate hydrogenase	0	0	0	1	0	0	0	0	0	0	0	0	0	0	0	0	0	0	0	0	0	0	1	0	0	0	0	0	0	0	0	0	0	0
Putative formate dehydrogenase oxidoreductase protein	Formate hydrogenase	0	0	0	0	0	0	0	0	0	0	0	2	0	0	0	0	0	0	0	0	0	0	0	0	0	0	0	0	0	0	0	0	0	0
Putative formate dehydrogenase oxidoreductase protein	Formate hydrogenase	1	2	1	2	0	4	0	3	1	4	1	0	2	2	2	5	0	0	2	0	2	2	2	3	0	3	2	2	2	1	0	2	0	4
Putative formate dehydrogenase oxidoreductase protein	Formate hydrogenase	0	0	0	0	0	0	0	0	0	0	0	0	0	0	1	0	0	0	0	0	0	0	0	1	0	0	0	0	0	0	0	0	0	0
Putative oxidoreductase SMc00968	Quinone oxidoreductase family	0	0	0	0	0	0	1	0	1	0	0	0	0	0	0	0	0	0	0	0	0	0	0	0	0	0	0	0	0	0	0	0	1	0
Putative oxidoreductase SMc00968	Quinone oxidoreductase family	1	1	1	1	0	1	1	1	1	1	1	0	1	1	1	1	0	1	1	1	1	1	1	1	1	1	1	1	1	1	1	1	1	1
Quinone oxidoreductase (EC 1.6.5.5)	Quinone oxidoreductase family	1	0	1	0	0	0	0	0	0	0	0	0	0	0	0	0	0	0	0	0	0	0	0	0	0	0	0	0	0	0	0	0	0	0
Quinone oxidoreductase (EC 1.6.5.5)	Quinone oxidoreductase family	0	0	0	0	1	0	0	0	0	0	0	1	0	0	0	0	0	0	0	0	0	0	0	0	0	0	0	0	0	0	0	0	0	0
Quinone oxidoreductase (EC 1.6.5.5)	Quinone oxidoreductase family	0	0	0	0	1	0	0	0	0	0	0	1	0	0	0	0	0	0	0	0	0	0	0	0	0	0	0	0	0	0	0	0	0	0
Quinone oxidoreductase (EC 1.6.5.5)	Quinone oxidoreductase family	0	1	0	1	0	1	0	1	0	1	0	0	1	1	1	1	0	0	1	1	1	1	1	1	0	1	1	1	1	1	0	1	0	1
Quinone oxidoreductase (EC 1.6.5.5)	Quinone oxidoreductase family	0	1	0	1	0	1	0	2	0	1	0	0	0	1	2	1	0	0	0	0	0	1	1	2	0	2	0	2	0	0	0	0	0	1
Quinone oxidoreductase (EC 1.6.5.5)	Quinone oxidoreductase family	1	1	1	1	0	1	1	1	1	1	1	0	1	1	1	1	1	1	1	1	1	1	1	1	1	1	1	1	1	1	1	1	1	1
Quinone oxidoreductase (EC 1.6.5.5)	Quinone oxidoreductase family	0	0	0	0	0	0	1	0	0	0	0	0	0	0	0	1	0	0	0	0	0	0	0	0	0	0	0	0	0	0	0	0	0	1
Quinone oxidoreductase (EC 1.6.5.5)	Quinone oxidoreductase family	0	0	0	0	0	0	0	0	0	0	0	0	0	0	1	0	0	0	0	0	0	0	0	1	0	0	0	1	0	0	0	0	0	0
Quinone oxidoreductase (EC 1.6.5.5)	Quinone oxidoreductase family	0	0	0	0	1	0	0	0	0	0	0	1	0	0	0	0	0	0	0	0	0	0	0	0	0	0	0	0	0	0	1	0	0	0
Quinone oxidoreductase (EC 1.6.5.5)	Quinone oxidoreductase family	0	0	0	0	0	0	0	0	0	0	0	0	1	0	0	0	0	0	0	0	0	0	0	0	0	0	1	0	0	0	0	0	0	0
soluble [2Fe-2S] ferredoxin	Soluble cytochromes and functionally related electron carriers	0	0	0	0	2	0	0	0	0	0	0	1	0	0	0	0	0	0	0	0	0	0	0	0	0	0	0	0	0	0	0	0	0	0
Succinate dehydrogenase cytochrome b-556 subunit	Succinate dehydrogenase	1	1	1	1	0	1	1	1	1	1	1	0	1	1	1	1	1	1	1	1	1	1	1	1	1	1	1	1	1	1	1	1	1	1
Succinate dehydrogenase flavoprotein subunit (EC 1.3.99.1)	Succinate dehydrogenase	0	0	0	0	0	0	0	0	1	0	0	0	0	0	0	0	0	1	1	0	1	0	0	0	1	0	0	0	0	1	1	0	0	0
Succinate dehydrogenase flavoprotein subunit (EC 1.3.99.1)	Succinate dehydrogenase	1	1	1	1	0	1	1	1	1	1	1	0	1	1	1	1	1	1	1	1	1	1	1	1	1	1	1	1	1	1	1	1	1	1
Succinate dehydrogenase hydrophobic membrane anchor protein	Succinate dehydrogenase	1	1	1	1	0	1	1	1	1	1	1	0	1	1	1	1	1	1	1	1	1	1	1	1	1	1	1	1	1	1	1	1	1	1
Thiol:disulfide oxidoreductase related to ResA	Biogenesis of c-type cytochromes	0	0	0	0	0	0	2	0	0	0	0	0	0	0	0	0	0	0	0	0	0	0	0	0	0	0	0	0	0	0	0	0	0	0
Transport ATP-binding protein CydC	Terminal cytochrome d ubiquinol oxidases	0	1	1	1	0	1	0	1	0	1	0	0	1	1	1	1	0	1	1	0	1	1	1	1	1	1	1	1	1	1	1	1	0	1
Transport ATP-binding protein CydD	Terminal cytochrome d ubiquinol oxidases	0	0	0	0	0	0	0	0	0	0	0	0	0	0	0	0	1	0	0	0	0	0	0	0	0	0	0	0	0	0	1	0	0	0
Transport ATP-binding protein CydD	Terminal cytochrome d ubiquinol oxidases	0	1	1	1	0	1	0	1	0	1	0	0	1	1	1	1	0	0	1	0	1	1	1	1	0	1	1	1	1	1	0	1	0	1
Transport ATP-binding protein CydD	Terminal cytochrome d ubiquinol oxidases	0	0	0	0	0	0	1	0	1	0	0	0	0	0	0	0	0	0	0	0	0	0	0	0	0	0	0	0	0	0	0	0	1	0
Transport ATP-binding protein CydD	Terminal cytochrome d ubiquinol oxidases	0	0	0	0	0	0	0	0	0	0	0	0	0	0	0	0	0	1	0	0	0	0	0	0	1	0	0	0	0	0	1	0	0	0
ubiquinol cytochrome C oxidoreductase, cytochrome C1 subunit	Ubiquinone Menaquinone-cytochrome c reductase complexes	1	1	1	1	0	1	1	1	1	1	1	0	1	1	1	1	1	1	1	1	1	1	1	1	1	1	1	1	1	1	1	1	1	1
ubiquinol cytochrome C oxidoreductase, cytochrome C1 subunit	Ubiquinone Menaquinone-cytochrome c reductase complexes	0	0	0	0	0	0	0	0	0	0	0	0	0	1	0	0	0	0	0	0	0	1	0	0	0	0	0	0	0	0	0	0	0	0
Ubiquinol-cytochrome C reductase iron-sulfur subunit (EC 1.10.2.2)	Ubiquinone Menaquinone-cytochrome c reductase complexes	1	1	1	1	0	1	1	1	1	1	1	0	1	1	1	1	1	1	1	1	1	1	1	1	1	1	1	1	1	1	1	1	1	1
Ubiquinol--cytochrome c reductase, cytochrome B subunit (EC 1.10.2.2)	Ubiquinone Menaquinone-cytochrome c reductase complexes	2	1	1	1	0	1	1	1	1	1	1	0	1	1	1	1	1	1	1	1	1	1	1	1	2	1	1	1	1	1	1	1	1	1
Ubiquinol--cytochrome c reductase, cytochrome B subunit (EC 1.10.2.2)	Ubiquinone Menaquinone-cytochrome c reductase complexes	0	0	0	0	0	0	0	0	0	0	0	0	0	1	0	0	0	0	0	0	0	1	0	0	0	0	0	0	0	0	0	0	0	0
Vanillate O-demethylase oxidoreductase (EC 1.14.13.-)	Anaerobic respiratory reductases	0	1	0	1	0	1	0	1	0	1	0	0	1	1	1	1	0	0	1	0	1	1	1	1	0	1	1	1	0	1	0	1	0	1
Vanillate O-demethylase oxidoreductase (EC 1.14.13.-)	Anaerobic respiratory reductases	0	0	0	0	0	0	0	0	0	0	0	0	1	1	1	0	0	0	0	0	0	1	0	1	0	0	0	1	0	1	0	0	0	0
Vanillate O-demethylase oxidoreductase (EC 1.14.13.-)	Anaerobic respiratory reductases	0	0	0	0	0	0	0	0	0	1	0	0	1	1	0	0	0	0	0	0	0	1	0	1	0	0	0	0	0	0	0	0	0	0
V-type ATP synthase subunit D (EC 3.6.3.14)	V-Type ATP synthase	0	0	0	0	0	0	0	0	0	0	0	1	0	0	0	0	0	0	0	0	0	0	0	0	0	0	0	0	0	0	0	1	0	0

## Sheet: Fig. 4C motility and chemotaxis
Table S6 Name of the specific genes
Gene name	Function description	Humibacter_albus_DSM_18994	Cryobacterium_sp_M91	Microbacterium_luticocti_DSM_19459	Cryobacterium_sp_Y50	Rubrobacter_xylanophilus_DSM9941	Cryobacterium_sp_Y11	Agrococcus_lahaulensis_DSM_17612	Cryobacterium_levicorallinum_CGMCC_111211	Microbacterium_gubbeenense_DSM_15944	Cryobacterium_sp_Y82	Gulosibacter_molinativorax_DSM_13485	Rubrobacter_radiotolerans_RSPS-4	Cryobacterium_luteum_CGMCC_111210	Cryobacterium_psychrotolerans_CGMCC_15382	Cryobacterium_sp_N21	Cryobacterium_sp_Y57	Pseudoclavibacter_soli_DSM_23366	Agromyces_italicus_DSM_16388	Cryobacterium_sp_M23	Cryobacterium_mesophilum_CGMCC_110440	Cryobacterium_sp_M25	Cryobacterium_sp_MLB-32	Cryobacterium_sp_Y62	Cryobacterium_sp_N19	Agromyces_subbeticus_DSM_16689	Cryobacterium_sp_Y29	Cryobacterium_arcticum_PAMC_27867	Cryobacterium_flavum_CGMCC_111215	Cryobacterium_sp_N22	Cryobacterium_roopkundense_RuG17	Leucobacter_chironomi_DSM_19883	Cryobacterium_sp_M96	Microbacterium_indicum_DSM_19969	Cryobacterium_sp_M15
Chemotaxis protein methyltransferase CheR (EC 2.1.1.80)	Bacterial Chemotaxis	0	0	0	0	1	0	0	0	0	0	0	1	0	0	0	0	0	0	0	0	0	0	0	0	0	0	0	0	0	0	0	0	0	0
Chemotaxis response regulator protein-glutamate methylesterase CheB (EC 3.1.1.61)	Bacterial Chemotaxis	0	0	0	0	0	0	0	0	0	0	0	0	0	1	0	0	0	0	0	0	0	1	0	0	0	0	0	0	0	0	0	0	0	0
Flagellar assembly protein FliH	Flagellum	0	1	0	1	0	1	0	1	0	1	0	0	1	1	1	1	0	0	1	0	1	1	1	1	0	1	1	1	1	1	0	1	0	1
Flagellar basal-body rod modification protein FlgD	Flagellum	0	1	0	1	0	1	0	1	0	1	0	0	1	1	1	1	0	0	1	0	1	1	1	1	0	1	1	1	1	1	0	1	0	1
Flagellar basal-body rod protein FlgB	Flagellum in Campylobacter	0	1	0	1	0	1	0	1	0	1	0	0	1	1	1	1	0	0	1	0	1	1	1	1	0	1	1	1	1	1	0	1	0	1
Flagellar basal-body rod protein FlgC	Flagellum in Campylobacter	0	1	0	1	0	1	0	1	0	1	0	0	1	1	1	1	0	0	1	0	1	1	1	1	0	1	1	1	1	1	0	1	0	1
Flagellar basal-body rod protein FlgC	Flagellum in Campylobacter	0	0	0	0	0	0	0	0	0	0	0	0	1	0	0	0	0	0	0	0	0	0	0	1	0	0	0	0	0	0	0	0	0	0
Flagellar biosynthesis protein FlhA	Flagellum	0	1	0	1	0	1	0	1	0	1	0	0	1	1	1	1	0	0	1	0	1	1	1	1	0	1	1	1	1	1	0	1	0	1
Flagellar biosynthesis protein FlhB	Flagellum	0	1	0	1	0	1	0	1	0	1	0	0	1	1	1	1	0	0	1	0	1	1	1	1	0	1	1	1	1	0	0	1	0	1
Flagellar biosynthesis protein FlhF	Flagellum	0	1	0	1	0	1	0	1	0	1	0	0	1	0	1	1	0	0	0	0	0	0	1	1	0	1	0	1	0	0	0	0	0	1
Flagellar biosynthesis protein FliP	Flagellum	0	1	0	1	0	1	0	1	0	1	0	0	1	1	1	1	0	0	1	0	1	1	1	1	0	1	1	1	1	1	0	1	0	1
Flagellar biosynthesis protein FliQ	Flagellum	0	1	0	1	0	1	0	1	0	1	0	0	1	1	1	1	0	0	1	0	1	1	1	1	0	1	1	1	1	1	0	1	0	1
Flagellar biosynthesis protein FliR	Flagellum	0	1	0	1	0	1	0	1	0	1	0	0	1	1	1	1	0	0	1	0	1	1	1	1	0	1	1	1	1	1	0	1	0	1
Flagellar biosynthesis protein FliS	Flagellum	0	1	0	1	0	1	0	1	0	1	0	0	1	1	1	1	0	0	1	0	1	1	1	1	0	1	1	1	1	1	0	1	0	1
Flagellar hook protein FlgE	Flagellum	0	1	0	1	0	1	0	1	0	1	0	0	1	1	1	1	0	0	1	0	1	1	1	1	0	1	1	1	1	1	0	1	0	1
Flagellar hook-associated protein FlgK	Flagellum	0	1	0	1	0	1	0	1	0	1	0	0	1	1	1	1	0	0	1	0	1	1	1	1	0	1	1	1	1	1	0	1	0	1
Flagellar hook-associated protein FlgL	Flagellum	0	1	0	1	0	1	0	1	0	1	0	0	1	1	1	1	0	0	1	0	1	1	1	1	0	1	1	1	1	1	0	1	0	1
Flagellar hook-associated protein FliD	Flagellum	0	1	0	1	0	1	0	1	0	1	0	0	1	1	1	1	0	0	1	0	1	1	1	1	0	1	1	1	1	1	0	1	0	1
Flagellar hook-basal body complex protein FliE	Flagellum in Campylobacter	0	1	0	1	0	1	0	1	0	1	0	0	1	1	1	1	0	0	1	0	1	1	1	1	0	1	1	1	1	1	0	1	0	1
Flagellar hook-length control protein FliK	Flagellum	0	0	0	0	0	0	0	0	0	1	0	0	0	0	0	1	0	0	0	0	0	0	0	0	0	0	0	0	0	0	0	0	0	0
Flagellar hook-length control protein FliK	Flagellum	0	0	0	0	0	0	0	0	0	0	0	0	0	1	0	0	0	0	1	0	0	1	0	0	0	0	1	0	1	2	0	0	0	0
Flagellar hook-length control protein FliK	Flagellum	0	0	0	0	0	1	0	0	0	0	0	0	0	0	0	0	0	0	1	0	1	0	0	0	0	0	0	0	0	0	0	1	0	0
Flagellar hook-length control protein FliK	Flagellum	0	0	0	0	0	0	0	0	0	0	0	0	0	0	0	0	0	0	0	0	0	0	0	0	0	0	2	0	0	0	0	0	0	0
Flagellar motor rotation protein MotA	Flagellum	0	1	0	1	0	1	0	1	0	1	0	0	1	1	1	1	0	0	1	0	1	1	1	1	0	1	1	1	1	1	0	1	0	1
Flagellar motor rotation protein MotB	Flagellum	0	1	0	1	0	1	0	1	0	1	0	0	1	1	1	1	0	0	1	0	1	1	1	1	0	1	1	1	1	1	0	1	0	1
Flagellar motor switch protein FliG	Bacterial Chemotaxis	0	1	0	1	0	1	0	1	0	1	0	0	1	1	1	1	0	0	1	0	1	1	1	1	0	1	1	1	1	1	0	1	0	1
Flagellar motor switch protein FliM	Bacterial Chemotaxis	0	1	0	1	0	1	0	1	0	1	0	0	1	1	1	1	0	0	1	0	1	1	1	1	0	1	1	1	1	1	0	1	0	1
Flagellar motor switch protein FliM	Bacterial Chemotaxis	1	0	0	0	0	0	0	0	0	0	0	0	0	0	0	0	0	0	1	0	0	0	0	0	0	0	0	0	0	0	0	0	0	0
Flagellar motor switch protein FliN	Bacterial Chemotaxis	0	1	0	1	0	1	0	1	0	1	0	0	1	1	1	1	0	0	1	0	1	1	1	1	0	1	1	1	1	1	0	1	0	1
Flagellar M-ring protein FliF	Flagellum	0	1	0	1	0	1	0	1	0	1	0	0	1	1	1	1	0	0	1	0	1	1	1	1	0	1	1	1	1	1	0	1	0	1
Flagellar protein FlbD	Flagellum	0	1	0	1	0	1	0	1	0	1	0	0	1	1	1	1	0	0	1	0	1	1	1	1	0	1	1	1	1	1	0	1	0	1
Flagellin protein FlaA	Flagellum in Campylobacter	0	2	0	1	0	1	0	2	0	2	0	0	1	1	3	1	0	0	1	0	1	1	1	1	0	1	1	2	1	1	0	1	0	1
Flagellin protein FlaA	Flagellum in Campylobacter	0	1	0	1	0	1	0	1	0	1	0	0	1	0	1	0	0	0	0	0	0	0	1	1	0	1	0	1	0	0	0	0	0	0
Flagellin protein FlaA	Flagellum in Campylobacter	0	0	0	1	0	0	0	0	0	1	0	0	0	0	0	0	0	0	0	0	0	0	1	0	0	0	0	0	0	0	0	0	0	0
Flagellum-specific ATP synthase FliI	Flagellum	0	1	0	1	0	1	0	1	0	1	0	0	1	1	1	1	0	0	1	0	1	1	1	1	0	1	1	1	1	1	0	1	0	1
Maltose/maltodextrin ABC transporter, substrate binding periplasmic protein MalE	Bacterial Chemotaxis	1	0	0	0	0	0	0	0	1	0	0	0	0	0	0	1	0	0	1	0	0	0	0	0	1	0	1	0	1	0	0	0	1	1
Maltose/maltodextrin ABC transporter, substrate binding periplasmic protein MalE	Bacterial Chemotaxis	0	0	0	0	4	0	0	0	0	0	0	2	0	0	0	0	0	0	0	0	0	0	0	0	0	0	0	0	0	0	0	0	0	0
Maltose/maltodextrin ABC transporter, substrate binding periplasmic protein MalE	Bacterial Chemotaxis	1	0	0	0	0	0	0	0	1	0	0	0	0	0	0	0	0	0	0	0	0	0	0	0	1	0	0	0	0	0	0	0	1	0
Maltose/maltodextrin ABC transporter, substrate binding periplasmic protein MalE	Bacterial Chemotaxis	0	0	0	0	0	0	0	0	0	0	0	0	0	0	0	0	0	0	1	0	0	0	0	0	0	0	1	0	1	0	0	1	0	0
Maltose/maltodextrin ABC transporter, substrate binding periplasmic protein MalE	Bacterial Chemotaxis	0	0	0	0	0	0	0	0	0	0	0	0	0	1	0	0	0	0	0	0	0	1	0	0	0	0	0	0	0	0	0	0	0	0
Ribose ABC transporter, periplasmic ribose-binding protein RbsB (TC 3.A.1.2.1)	Bacterial Chemotaxis	0	1	0	1	0	0	0	1	0	1	0	0	0	0	1	1	0	0	0	0	0	0	1	1	0	1	0	1	0	0	0	0	0	1
Ribose ABC transporter, periplasmic ribose-binding protein RbsB (TC 3.A.1.2.1)	Bacterial Chemotaxis	0	0	0	0	0	0	0	0	0	0	0	0	0	0	0	0	0	1	0	0	0	0	0	0	1	0	0	0	0	0	1	0	0	0
Signal transduction histidine kinase CheA (EC 2.7.3.-)	Bacterial Chemotaxis	0	0	0	0	0	0	0	0	0	0	0	0	0	1	0	0	0	0	0	0	0	1	0	0	0	0	0	0	0	0	0	0	0	0
